# Supplementary material for: Synthesis of New Highly Functionalized 1H-Indole-2-carbonitriles via Cross-Coupling Reactions
Source: MDPI journal article supplement (doi:10.3390/molecules26175287), 2021-08-31

## **SUPPORTING INFORMATION**

### **Table of Contents**

|                                                                                                  |                   |
|--------------------------------------------------------------------------------------------------|-------------------|
| 1. $^1\text{H}$ NMR and J-mod spectra of compounds <b>3</b>                                      | <i>page 2-6</i>   |
| 2. $^1\text{H}$ NMR and $^{13}\text{C}$ NMR spectra of compound <b>4</b>                         | <i>page 7</i>     |
| 3. $^1\text{H}$ NMR and $^{13}\text{C}$ NMR spectra of compounds <b>5</b>                        | <i>page 8-13</i>  |
| 4. $^1\text{H}$ NMR and $^{13}\text{C}$ NMR spectra of compounds <b>6</b>                        | <i>page 14-18</i> |
| 5. $^1\text{H}$ NMR and $^{13}\text{C}$ NMR spectra or J-mod experiment of compounds <b>7</b>    | <i>page 19-23</i> |
| 6. $^1\text{H}$ NMR and $^{13}\text{C}$ NMR spectra or J-mod experiment of compounds <b>8</b>    | <i>page 24-36</i> |
| 7. $^1\text{H}$ NMR and $^{13}\text{C}$ NMR spectra or J-mod experiment of of compounds <b>9</b> | <i>page 37-56</i> |
| 8. $^1\text{H}$ NMR and $^{13}\text{C}$ NMR spectra of compounds <b>10</b>                       | <i>page 57-63</i> |
| 9. $^1\text{H}$ NMR and $^{13}\text{C}$ NMR spectra of compounds <b>11</b>                       | <i>page 64-65</i> |
| 10. $^1\text{H}$ NMR and $^{13}\text{C}$ NMR spectra of compound <b>8b'</b>                      | <i>page 66</i>    |

# **1*H*-Indole-2-carbonitrile (3a)**

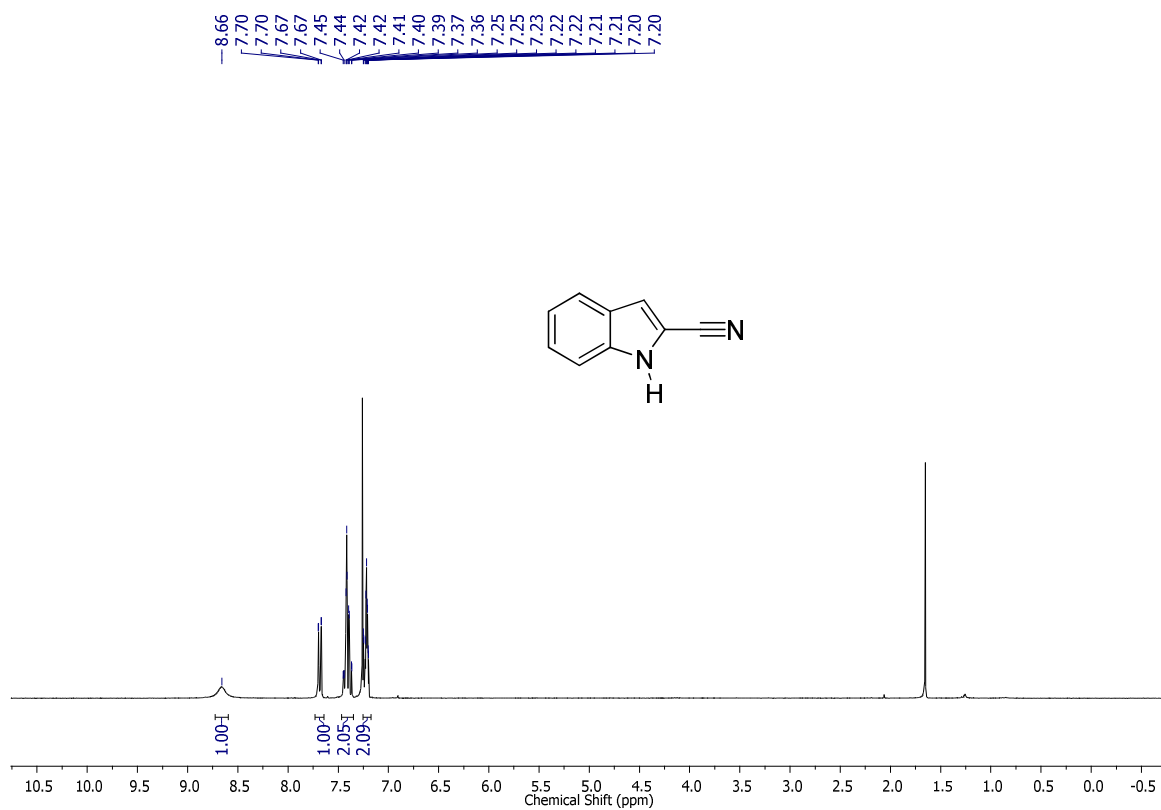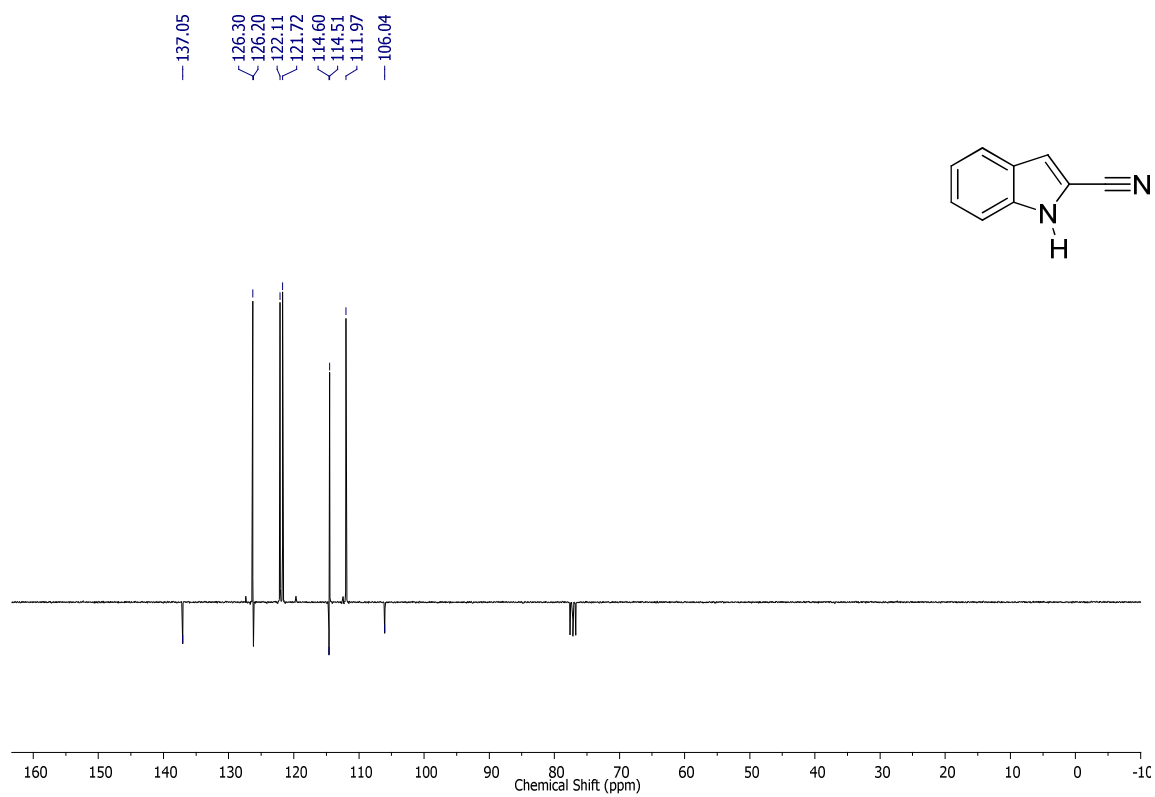

# **5-Methoxy-1*H*-indole-2-carbonitrile (3b)**

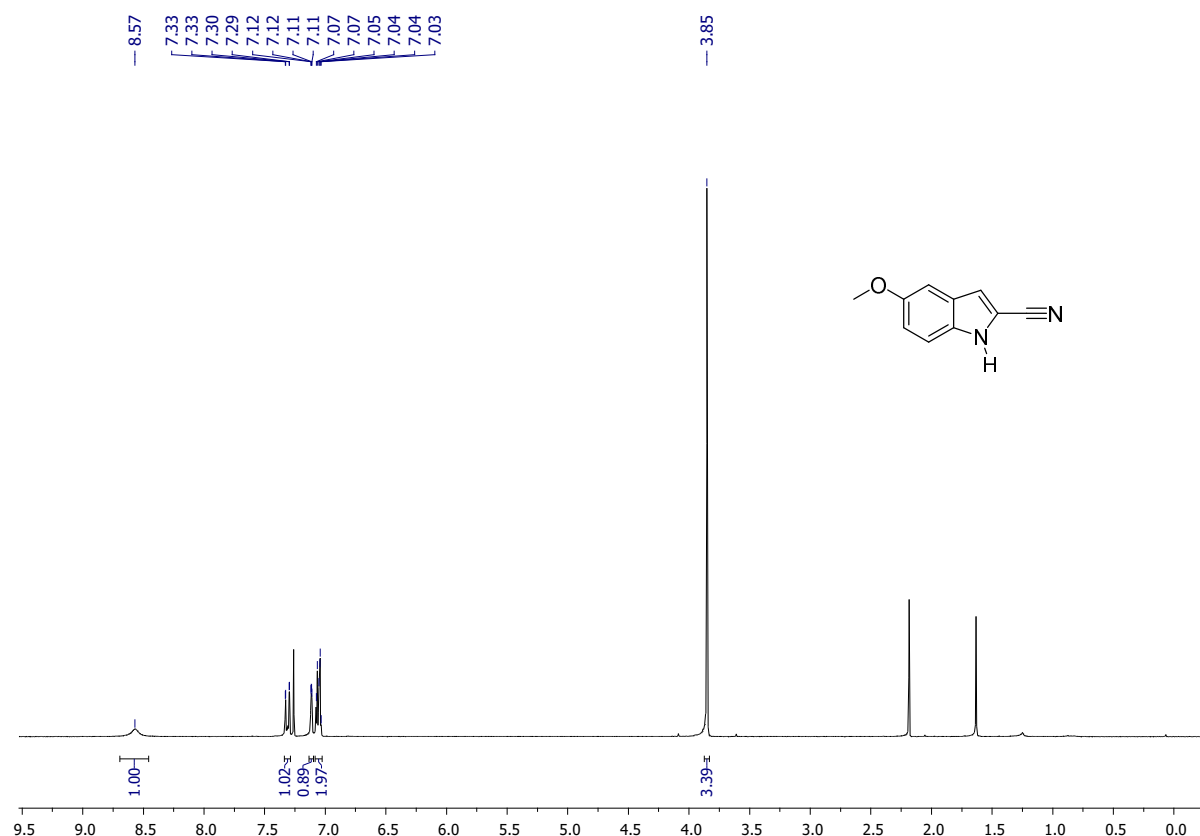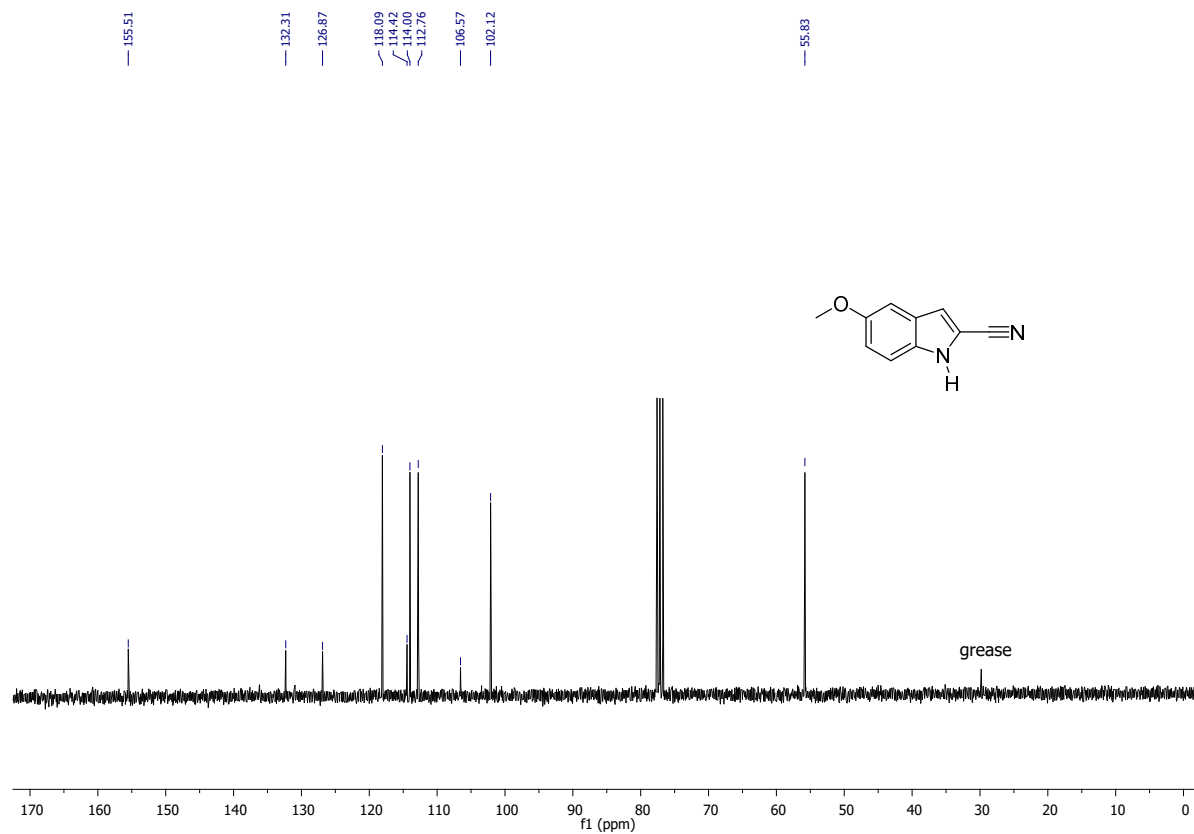

# 6-Methoxy-1*H*-indole-2-carbonitrile (3c)

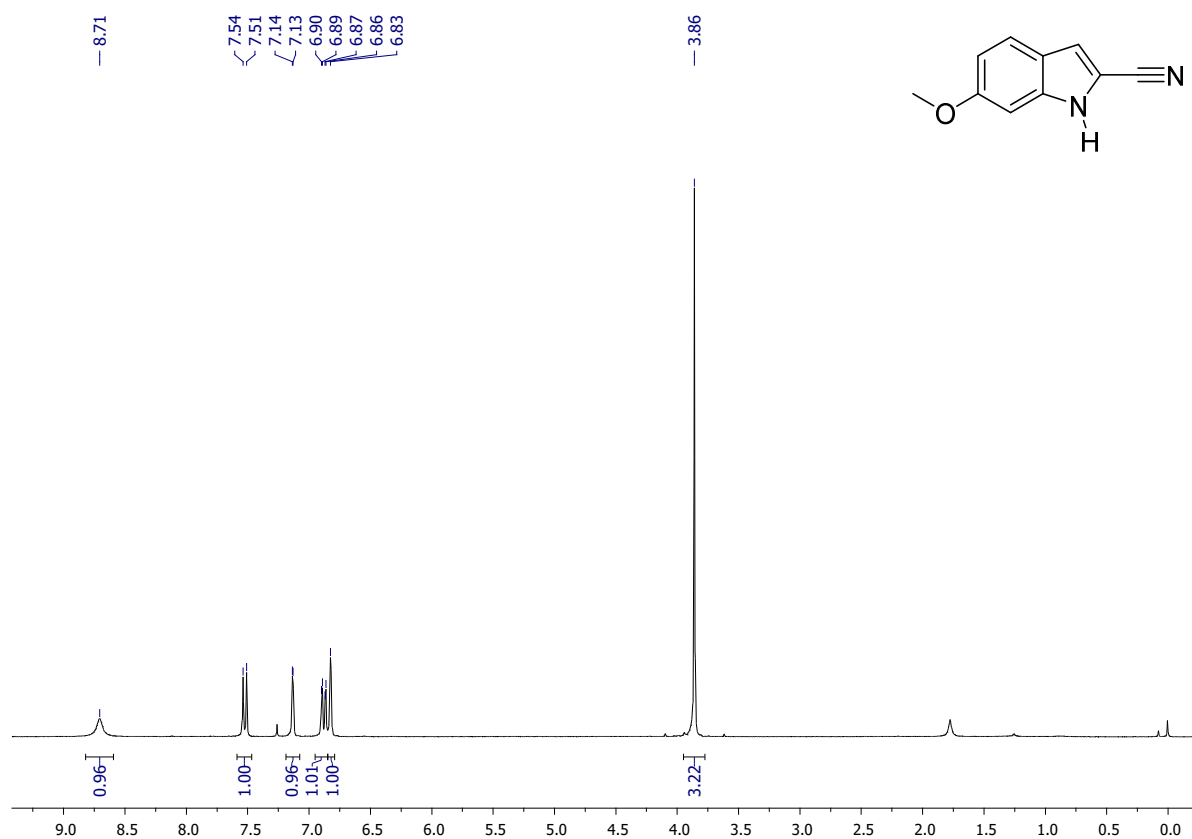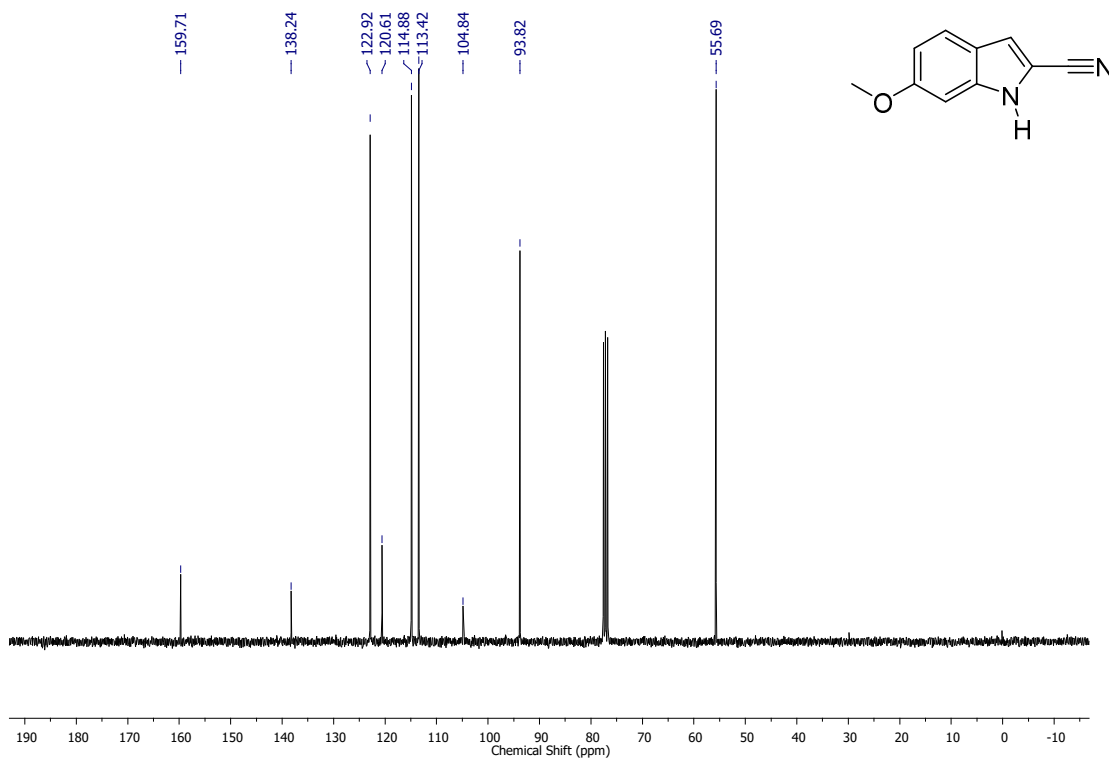

### 5-Fluoro-1*H*-indole-2-carbonitrile (3d)

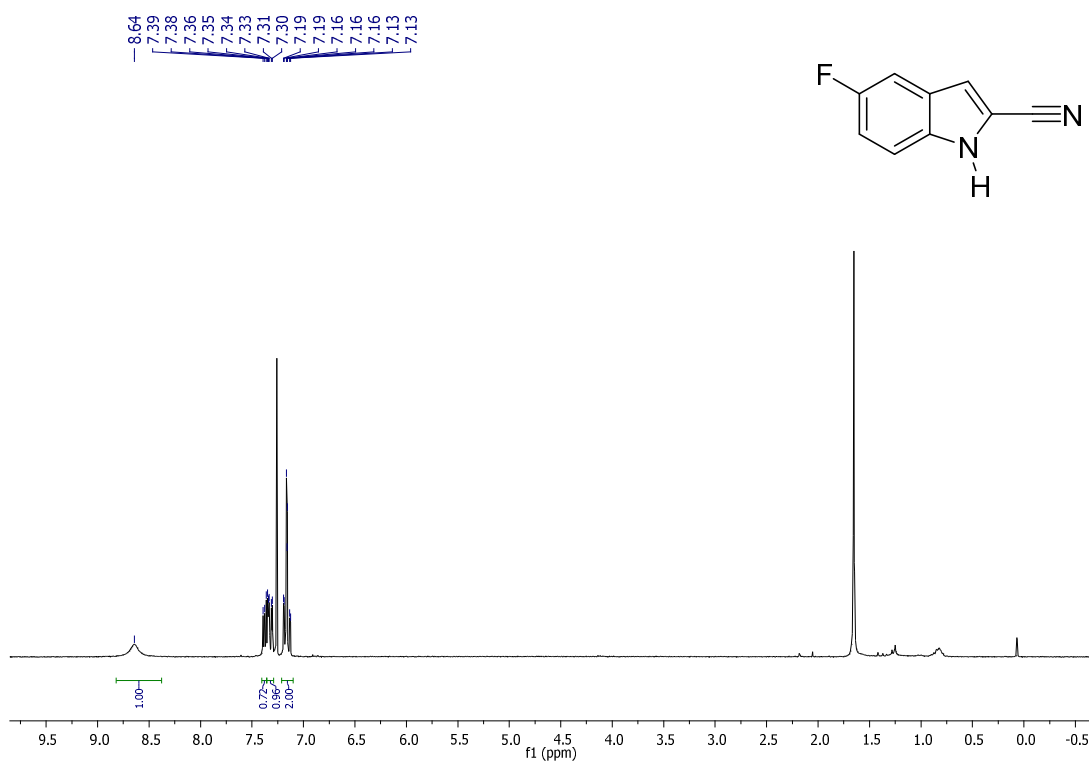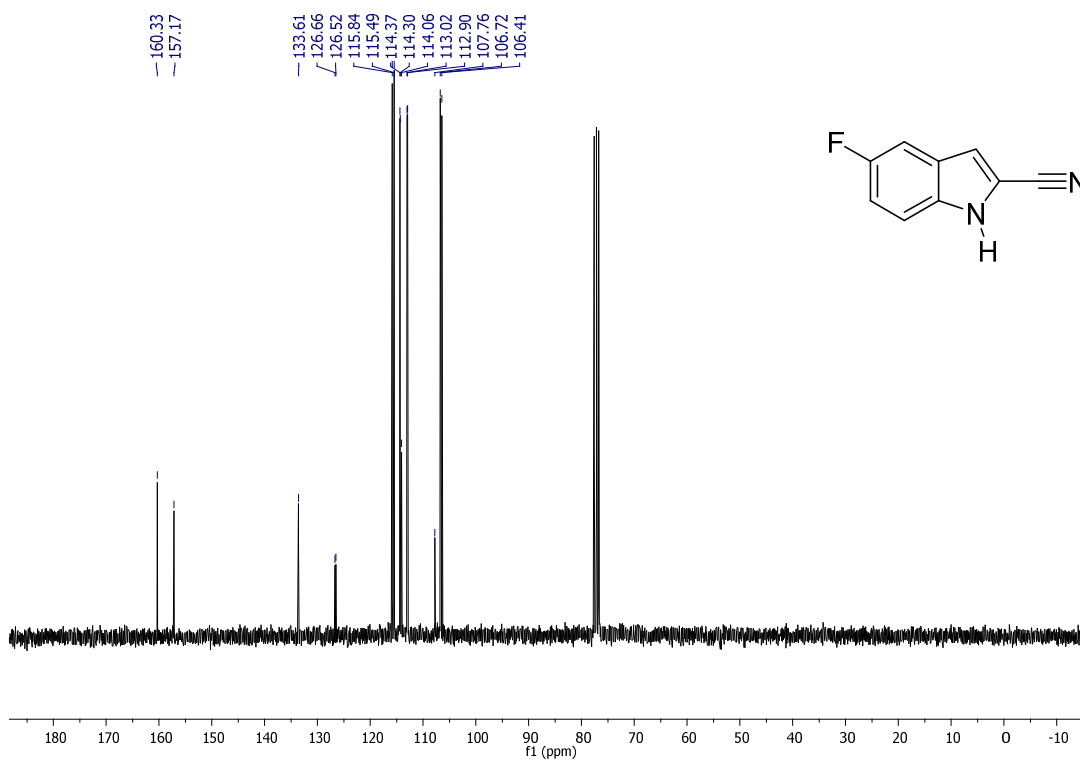

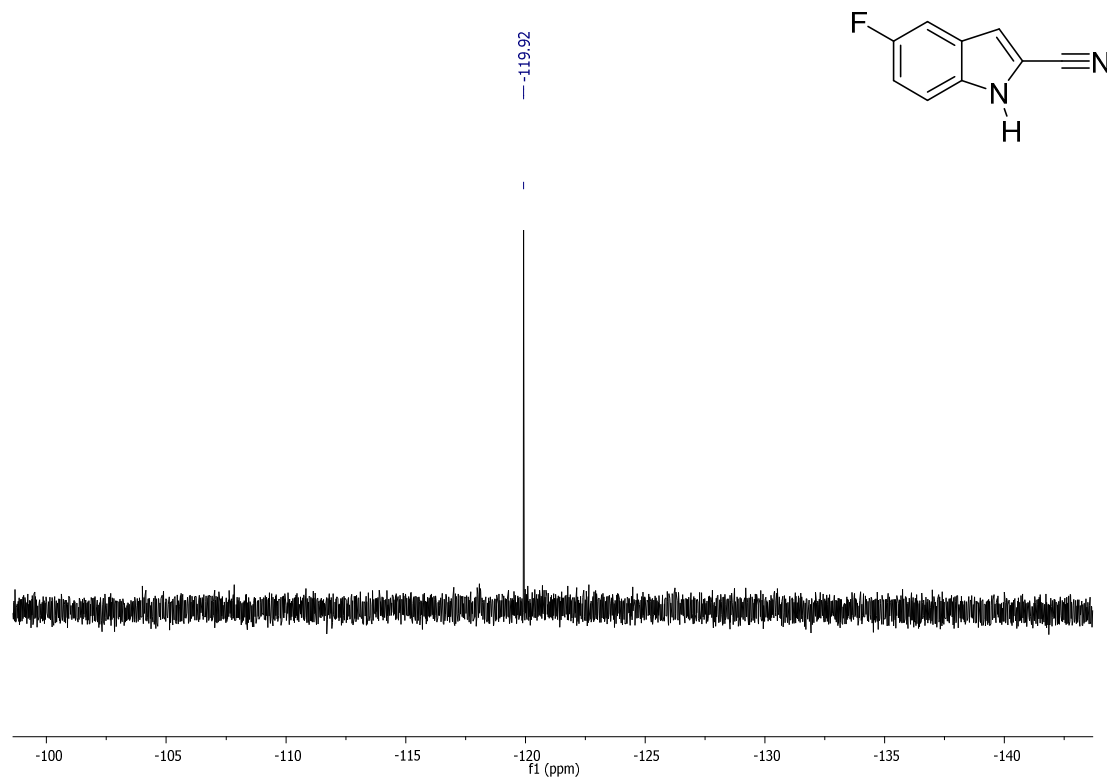

# 1-(Prop-2-yn-1-yl)-1*H*-indole-2-carbonitrile (4a)

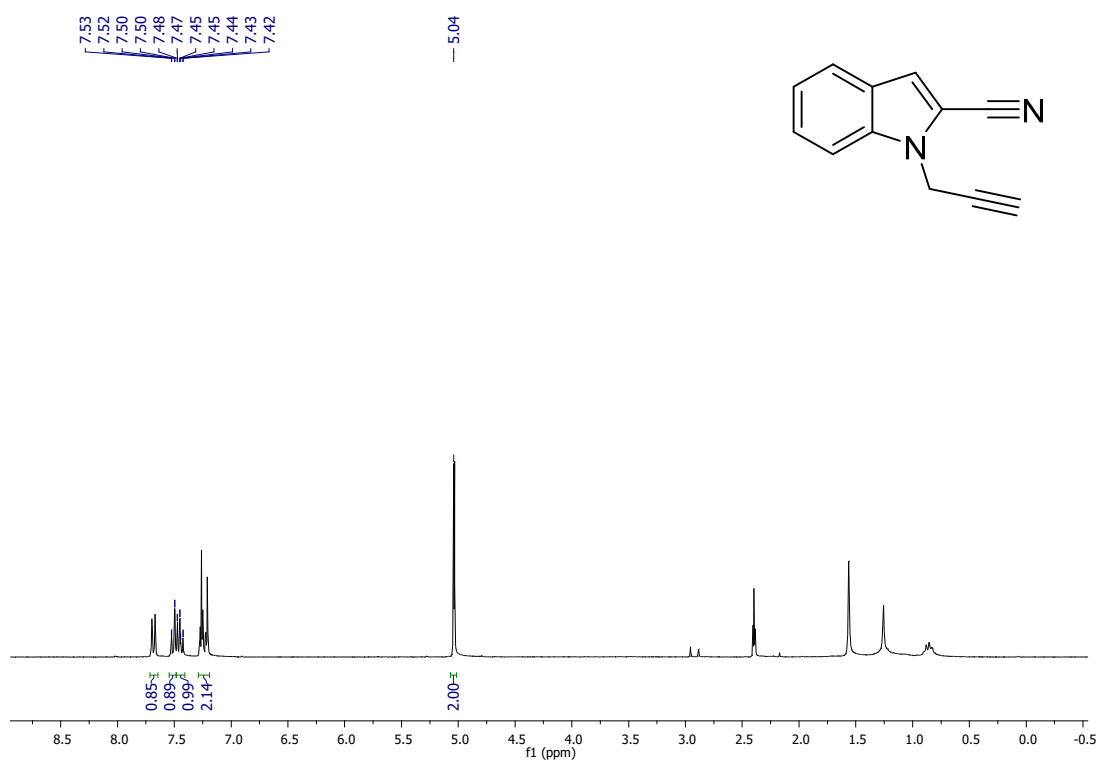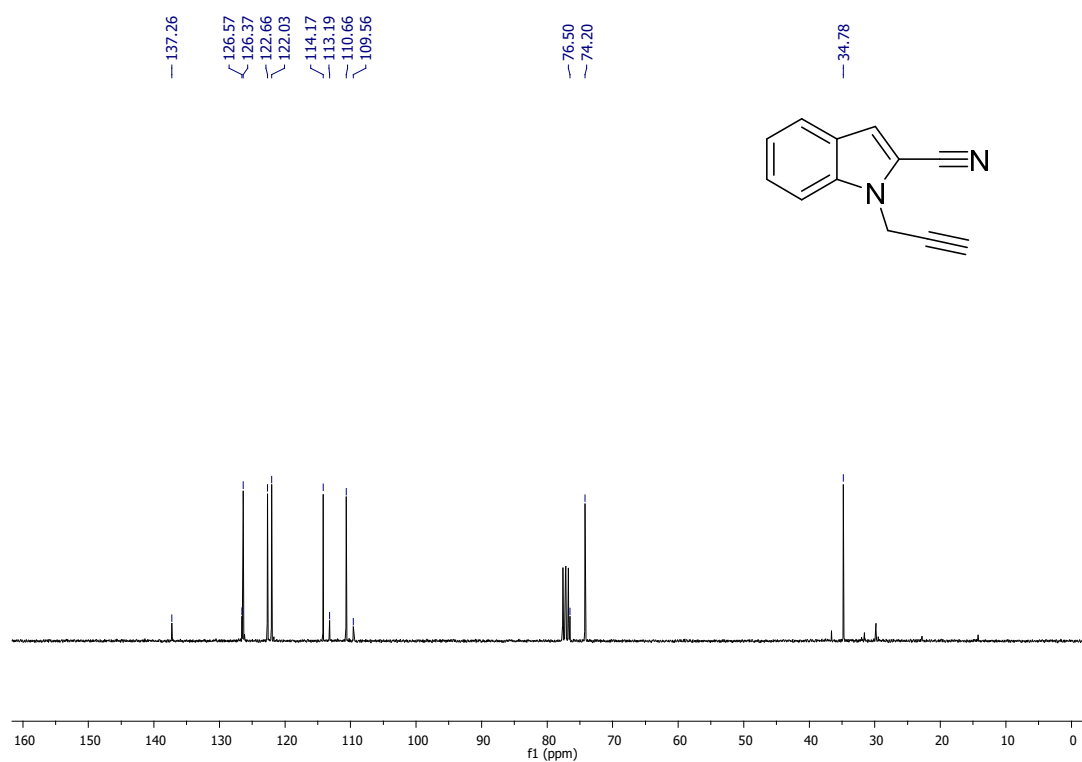

**1-(3-(*p*-Tolyl)prop-2-yn-1-yl)-1*H*-indole-2-carbonitrile (5a)**

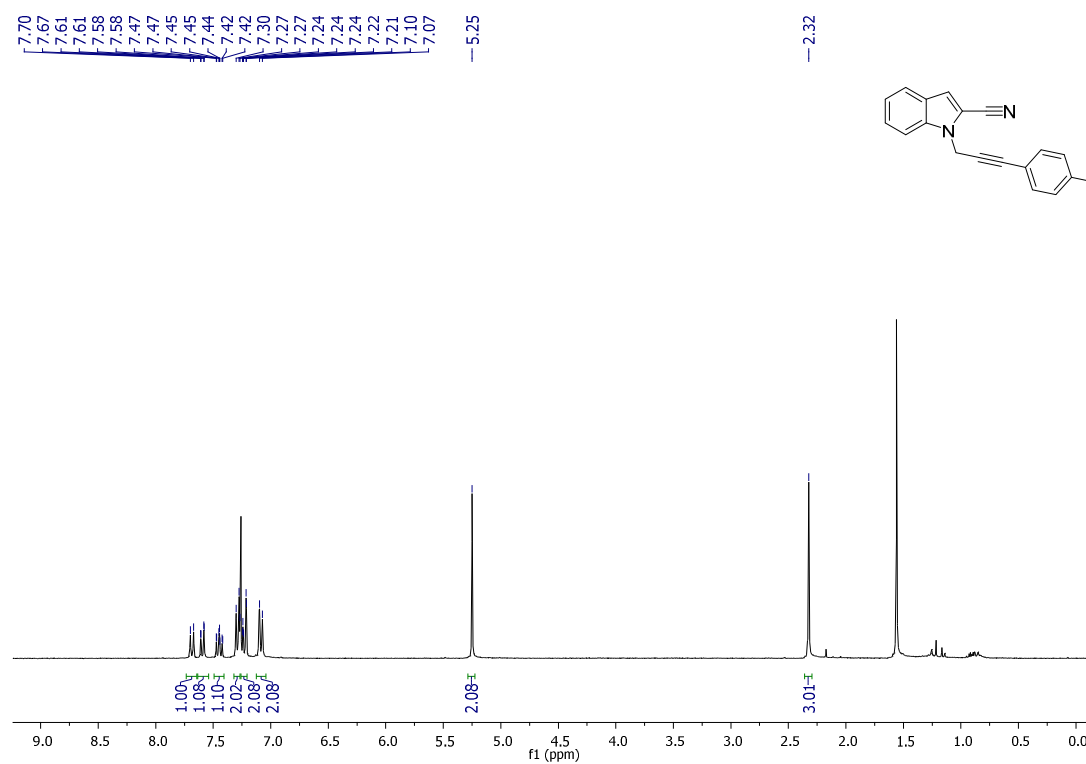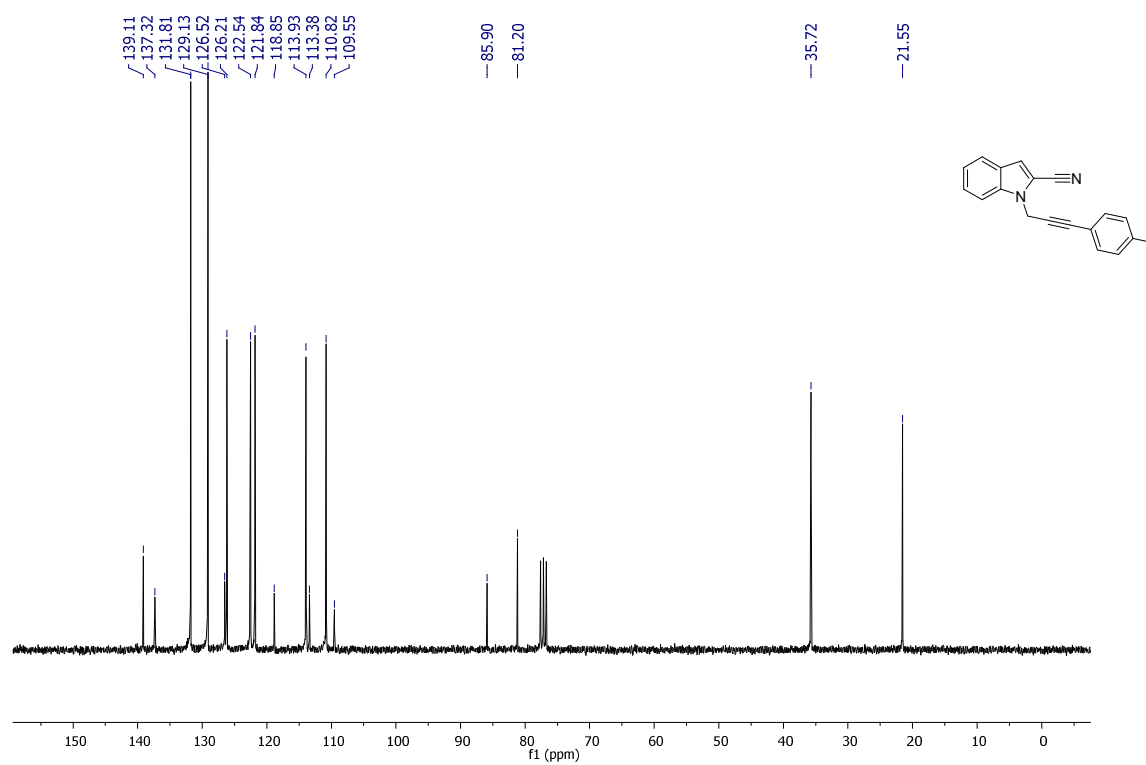



# 1-(3-(4-Chlorophenyl)prop-2-yn-1-yl)-1*H*-indole-2-carbonitrile (5b)

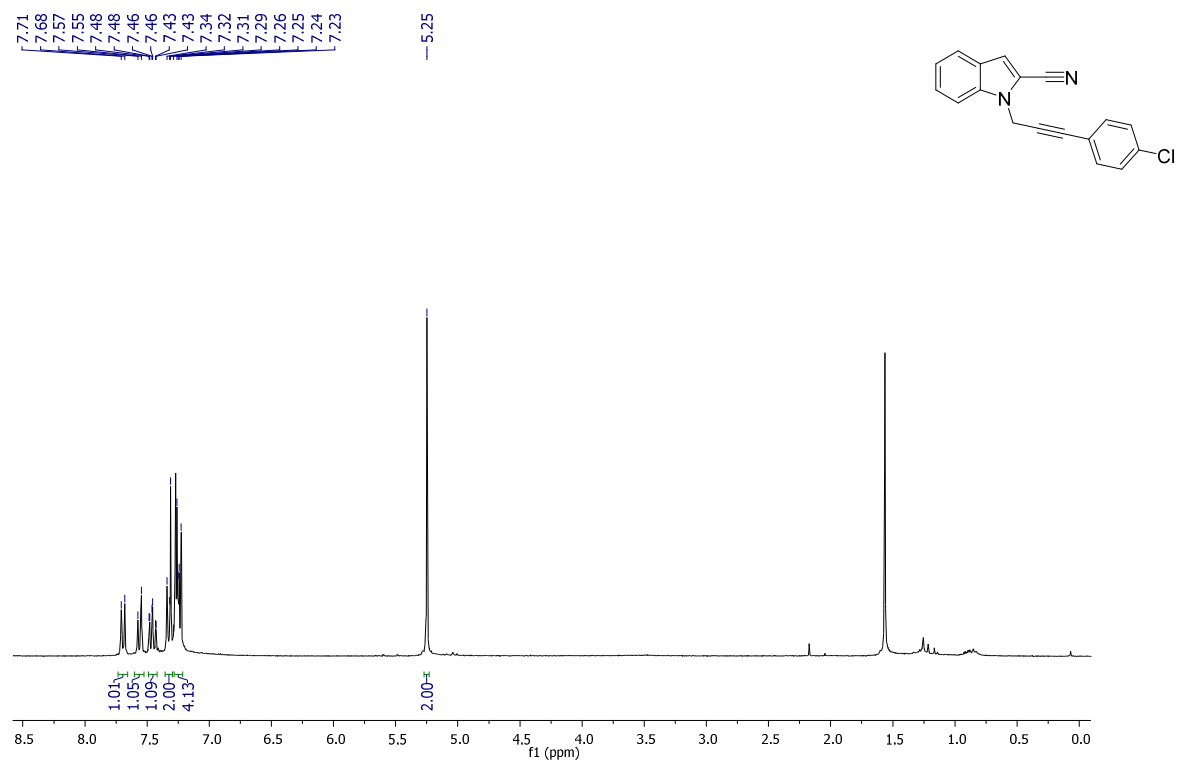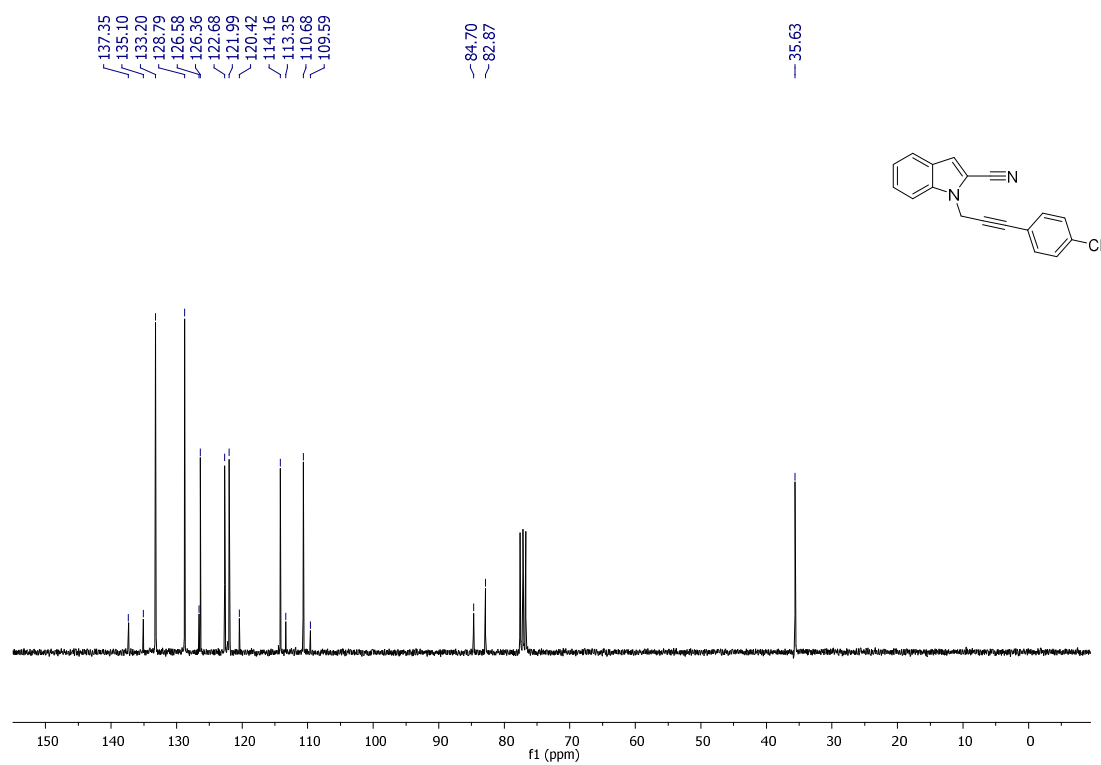

**1-(3-(4-(Trifluoromethyl)phenyl)prop-2-yn-1-yl)-1*H*-indole-2-carbonitrile (5c)**

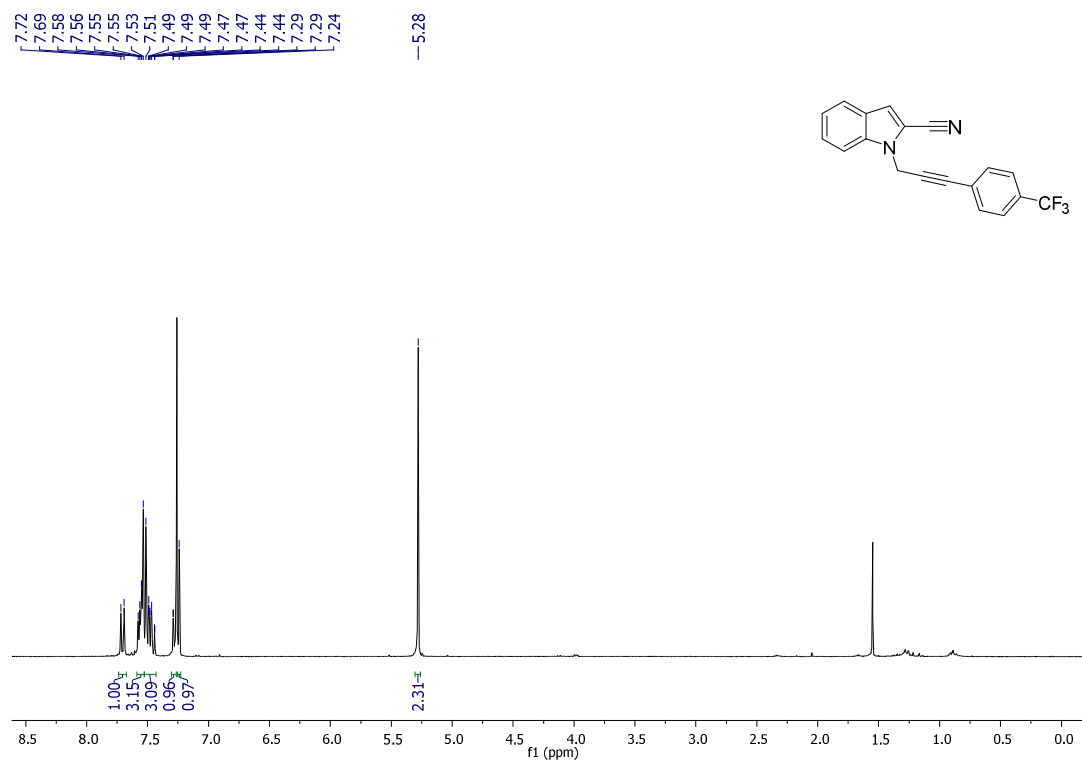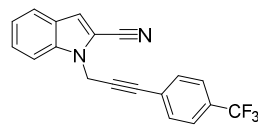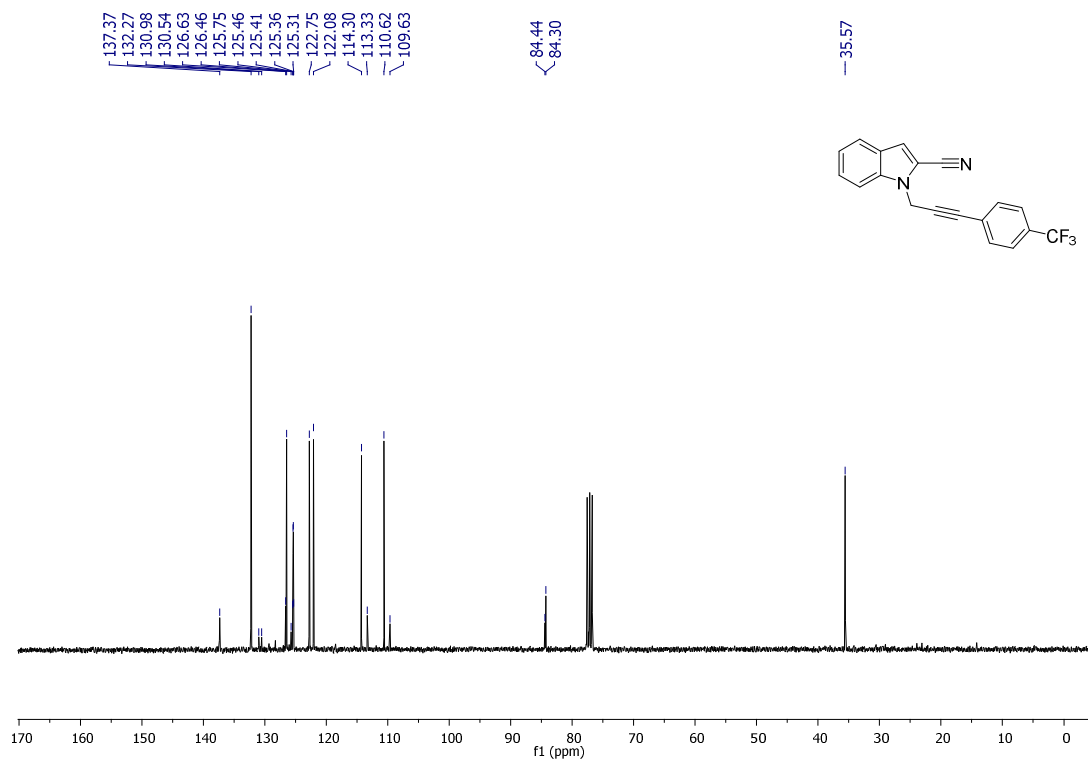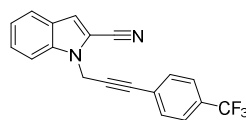

**1-(3-(2-Cyanophenyl)prop-2-yn-1-yl)-1*H*-indole-2-carbonitrile (5d)**

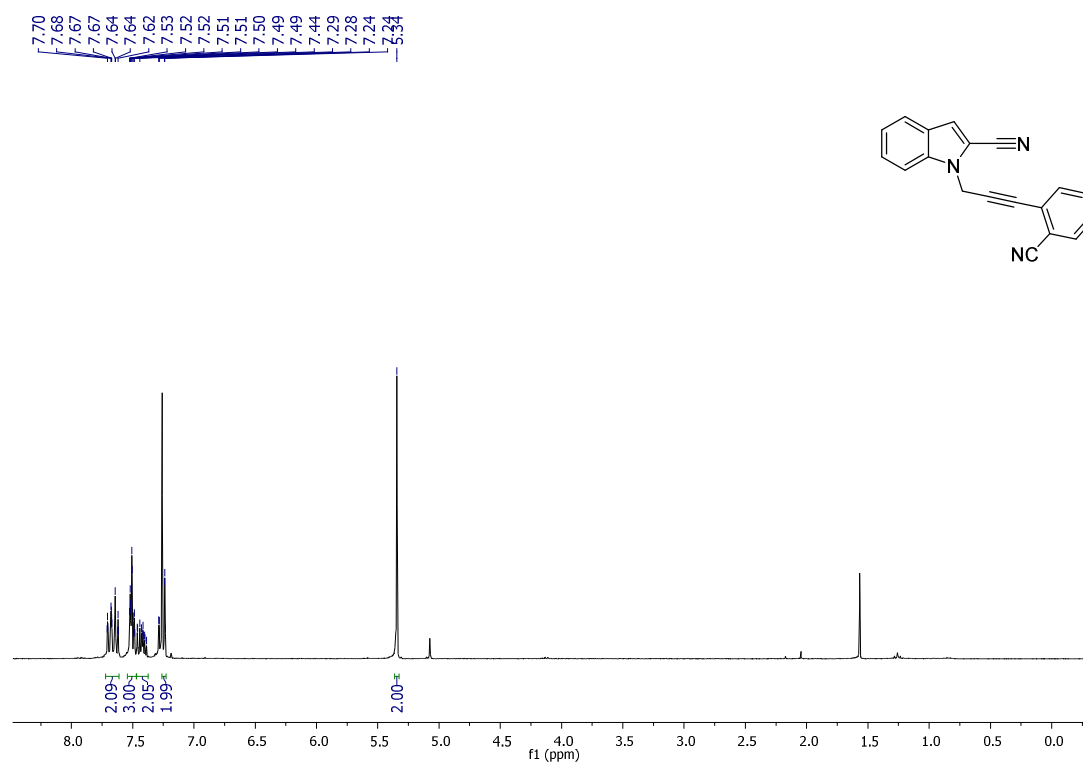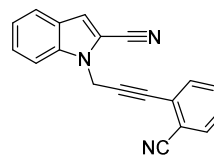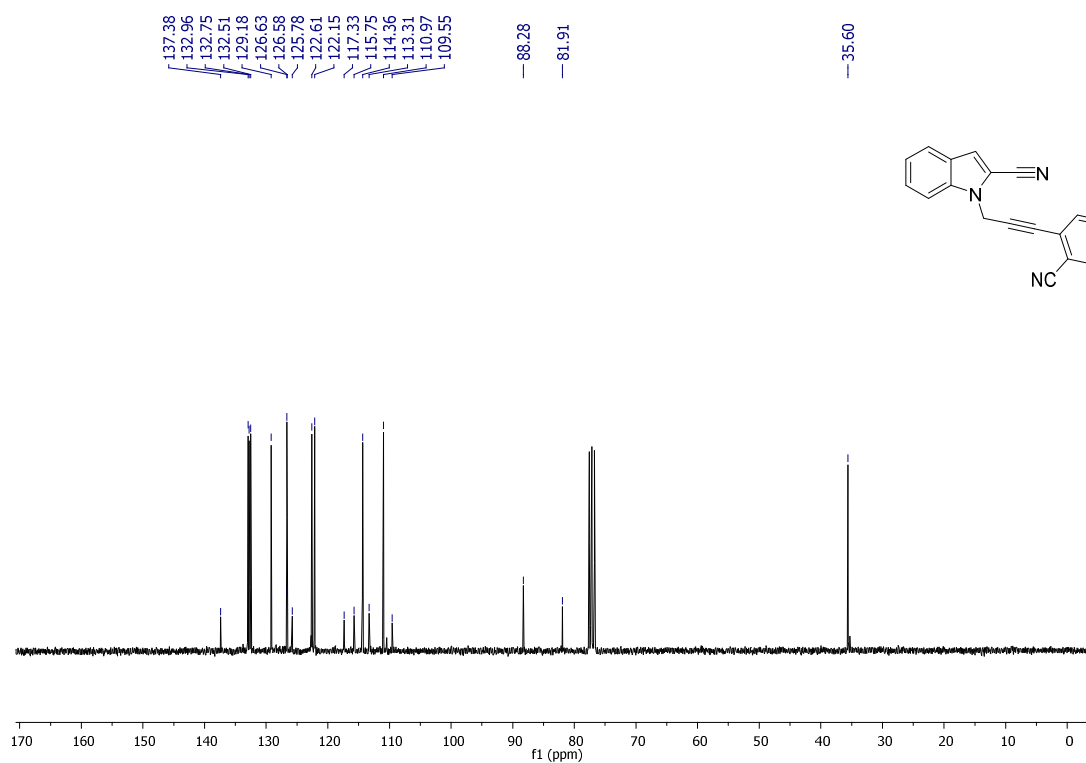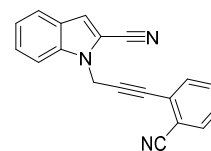

**1-(3-(2-Methoxyphenyl)prop-2-yn-1-yl)-1*H*-indole-2-carbonitrile (5e)**

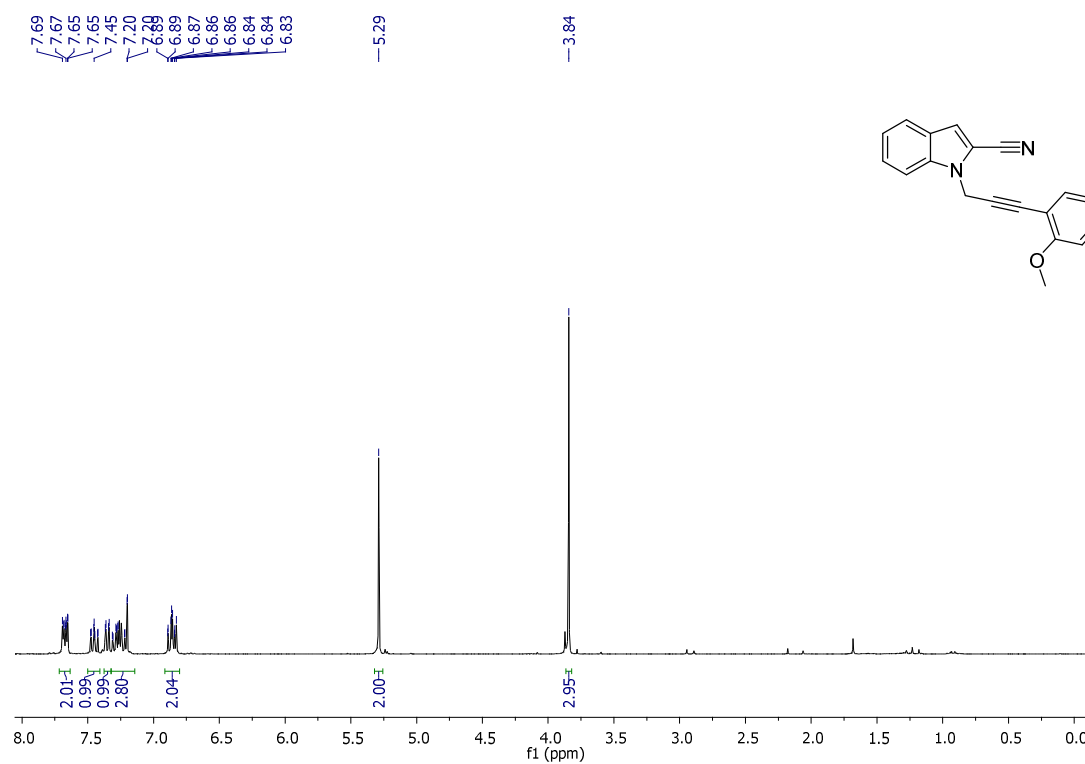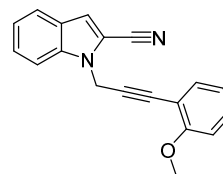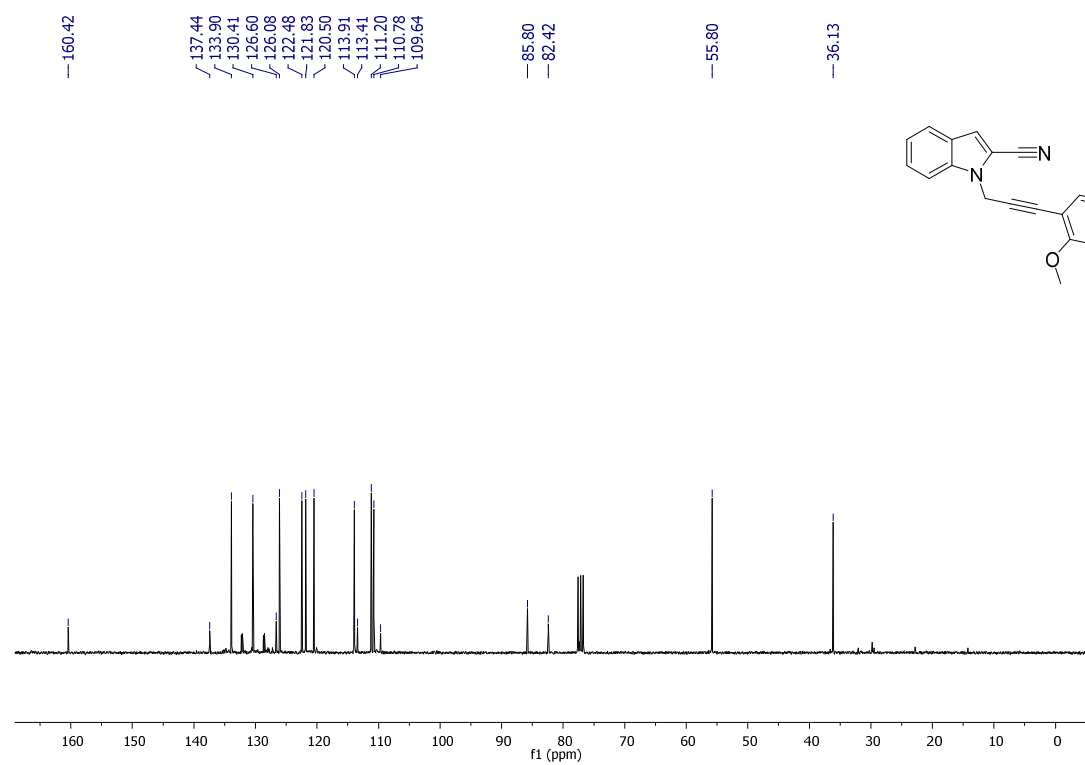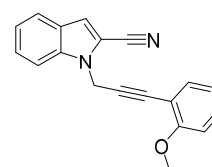

**1-(3-(3,4-Dichlorophenyl)prop-2-yn-1-yl)-1*H*-indole-2-carbonitrile (5f)**

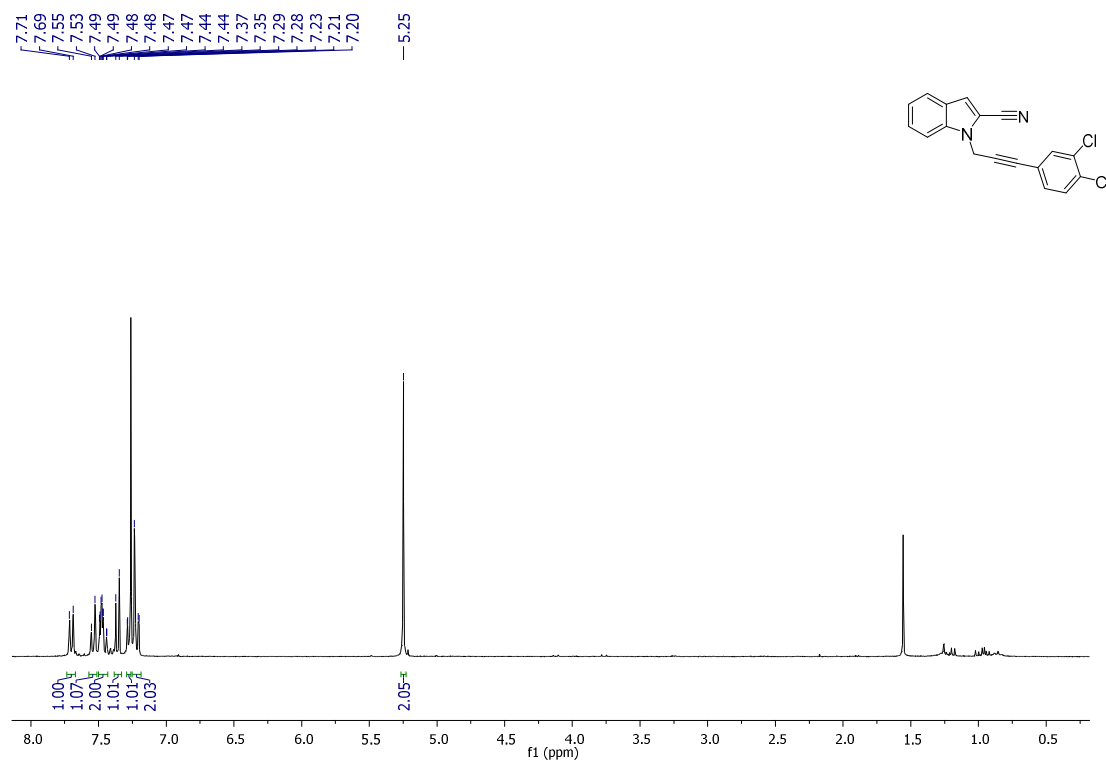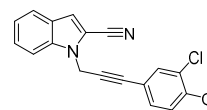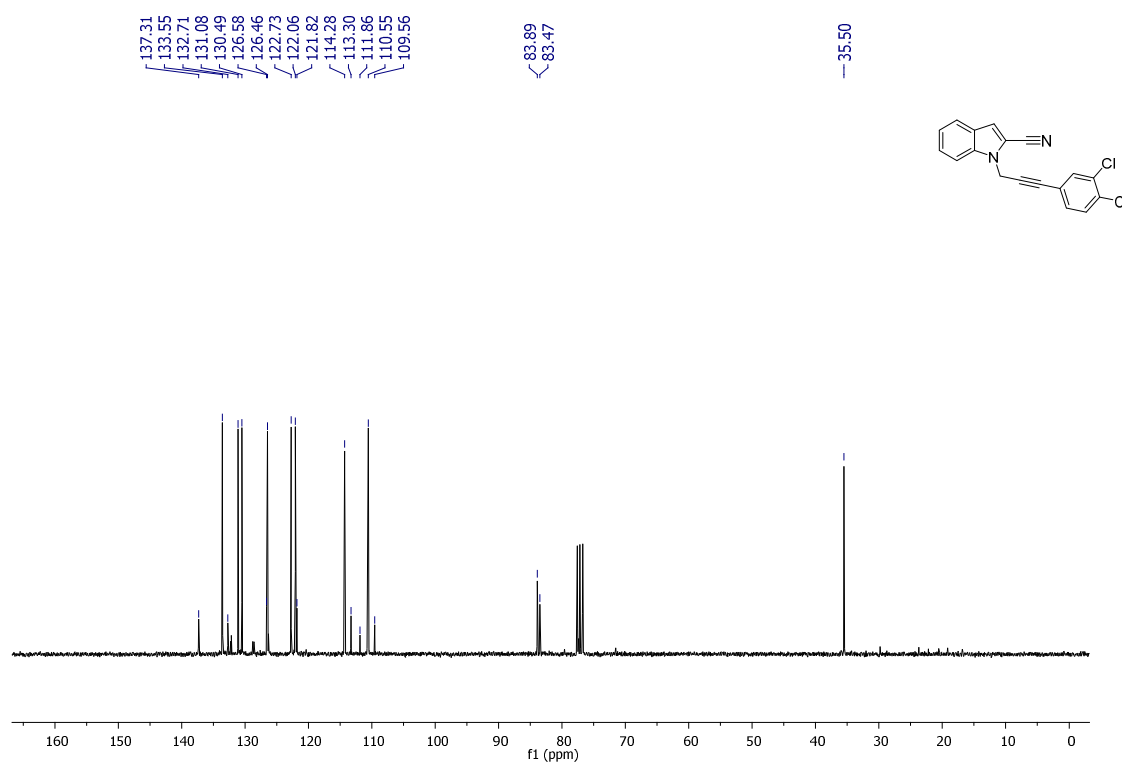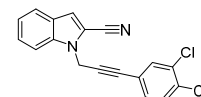

### 3-Iodo-1*H*-indole-2-carbonitrile (6a)

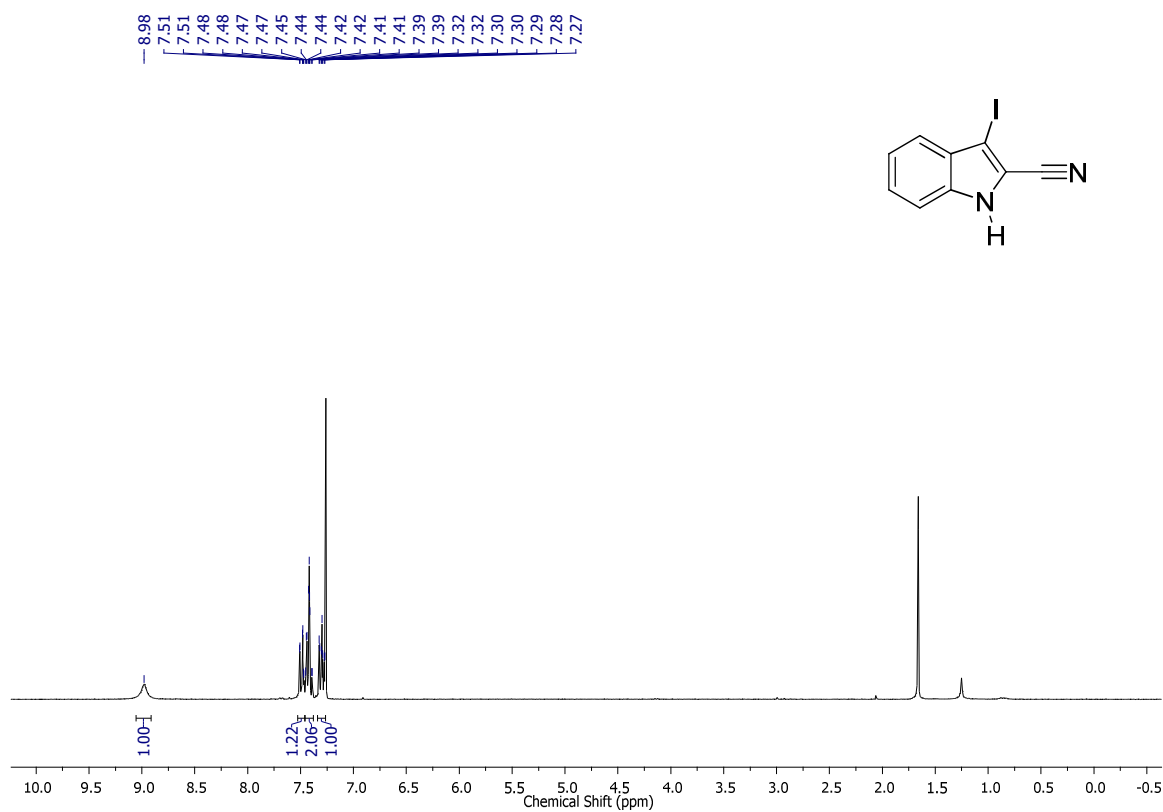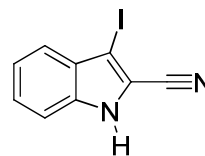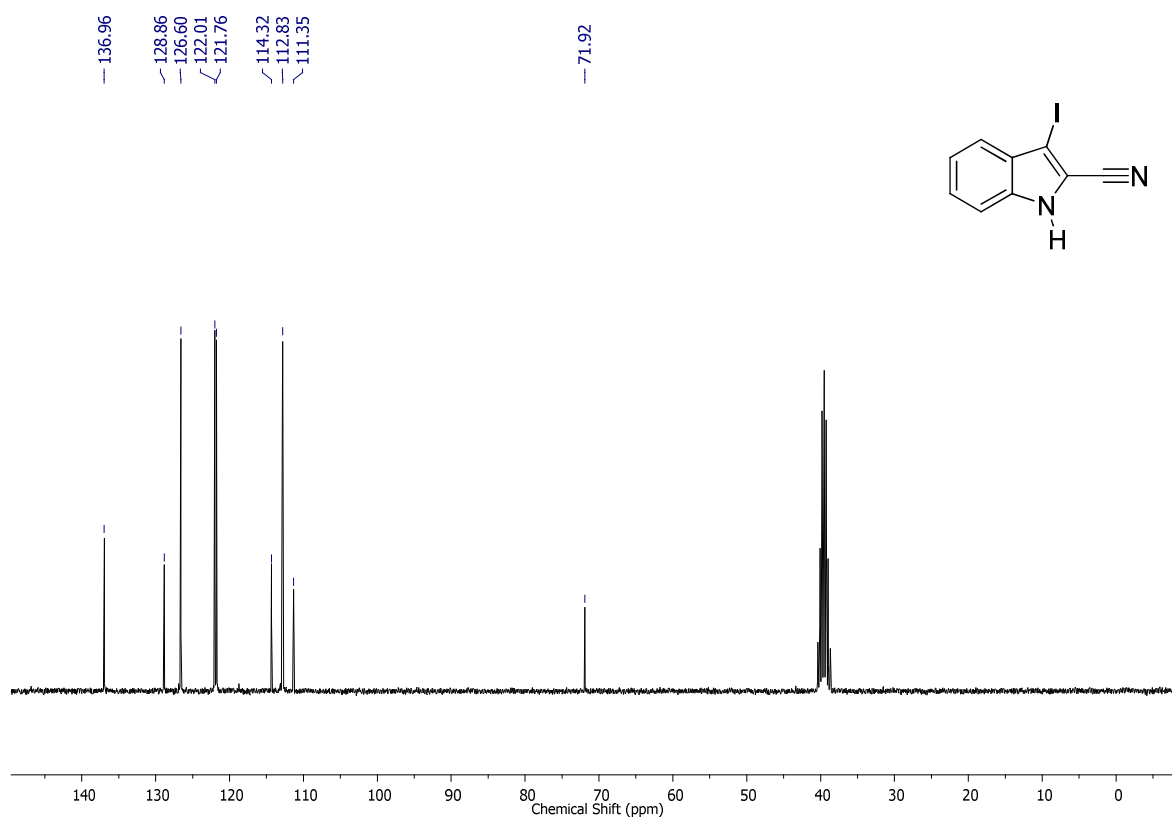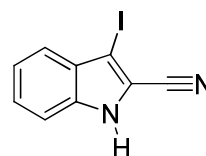

### 3-Iodo-5-methoxy-1*H*-indole-2-carbonitrile (6b)

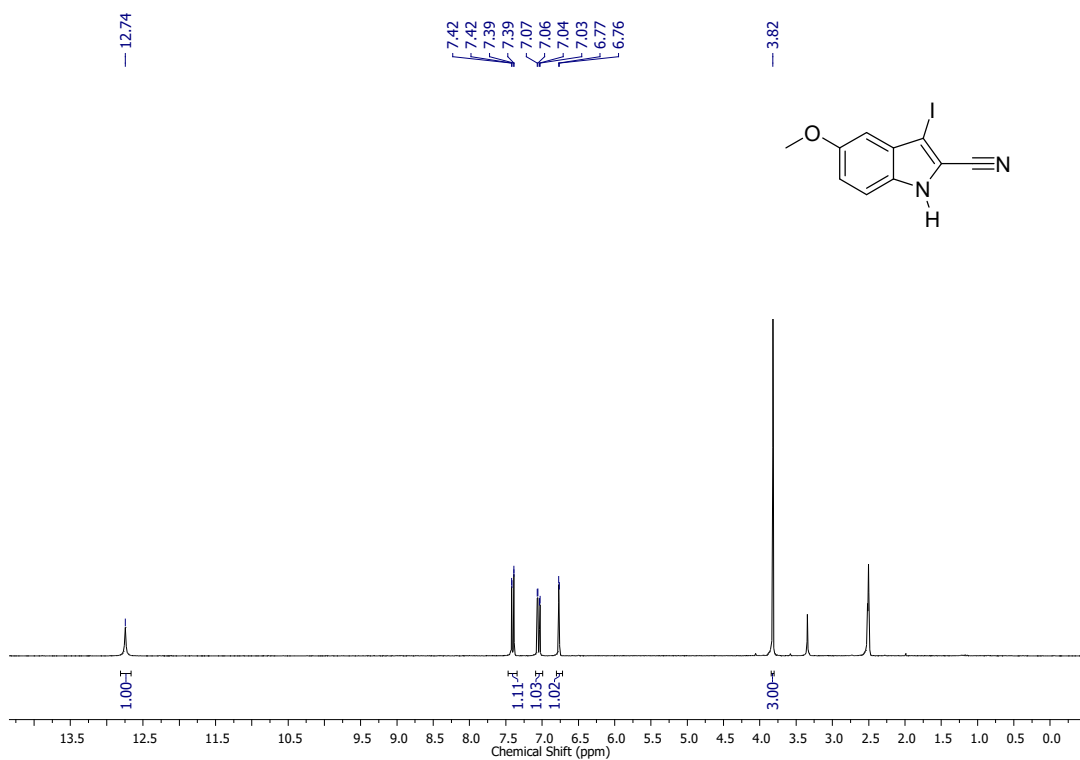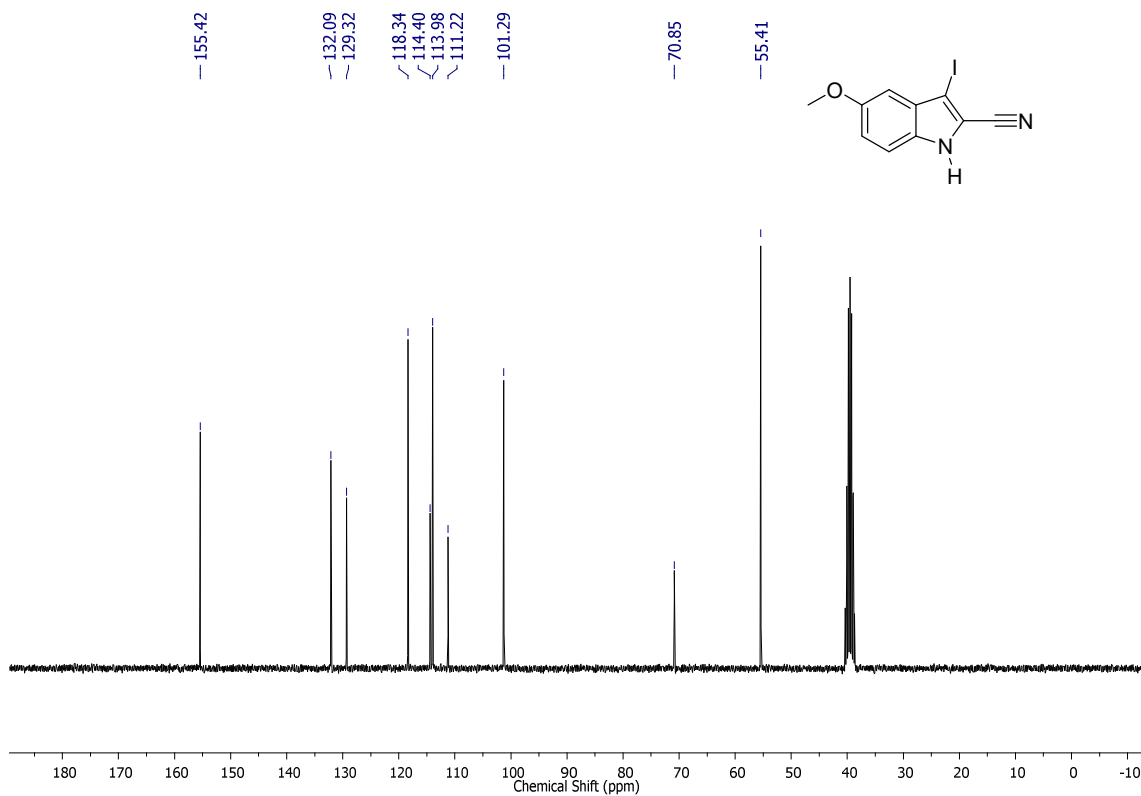

### 3-Iodo-6-methoxy-1*H*-indole-2-carbonitrile (6c)

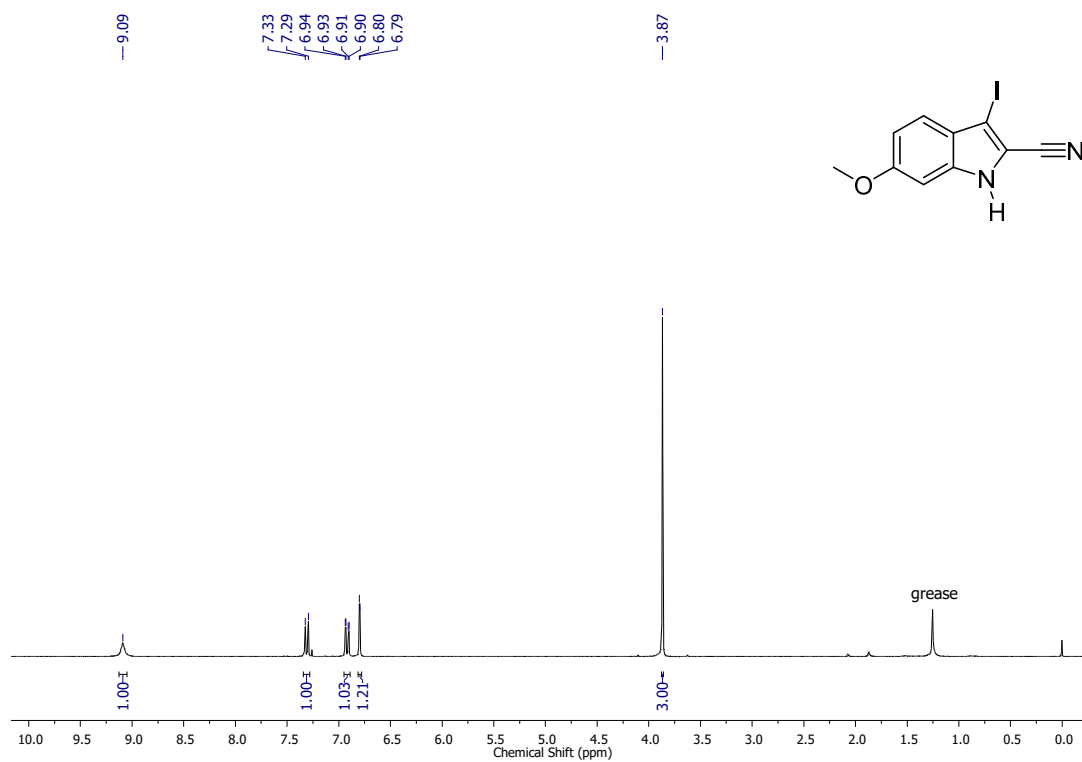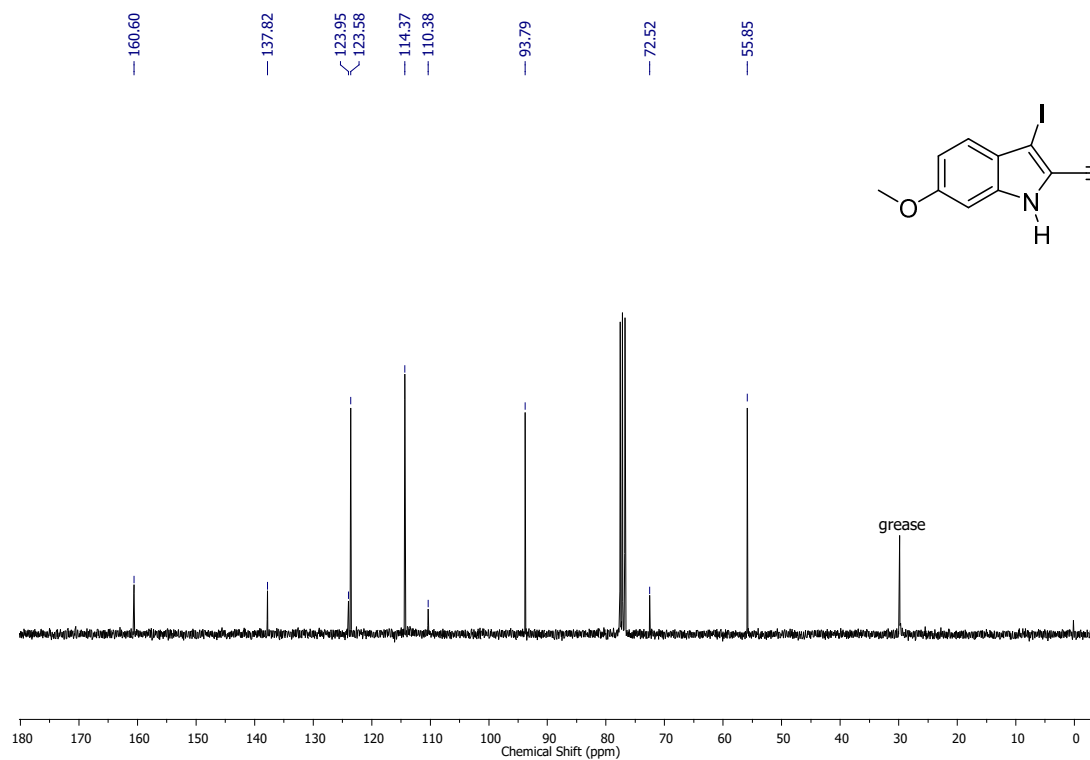



# 5-Fluoro-3-iodo-1*H*-indole-2-carbonitrile (6d)

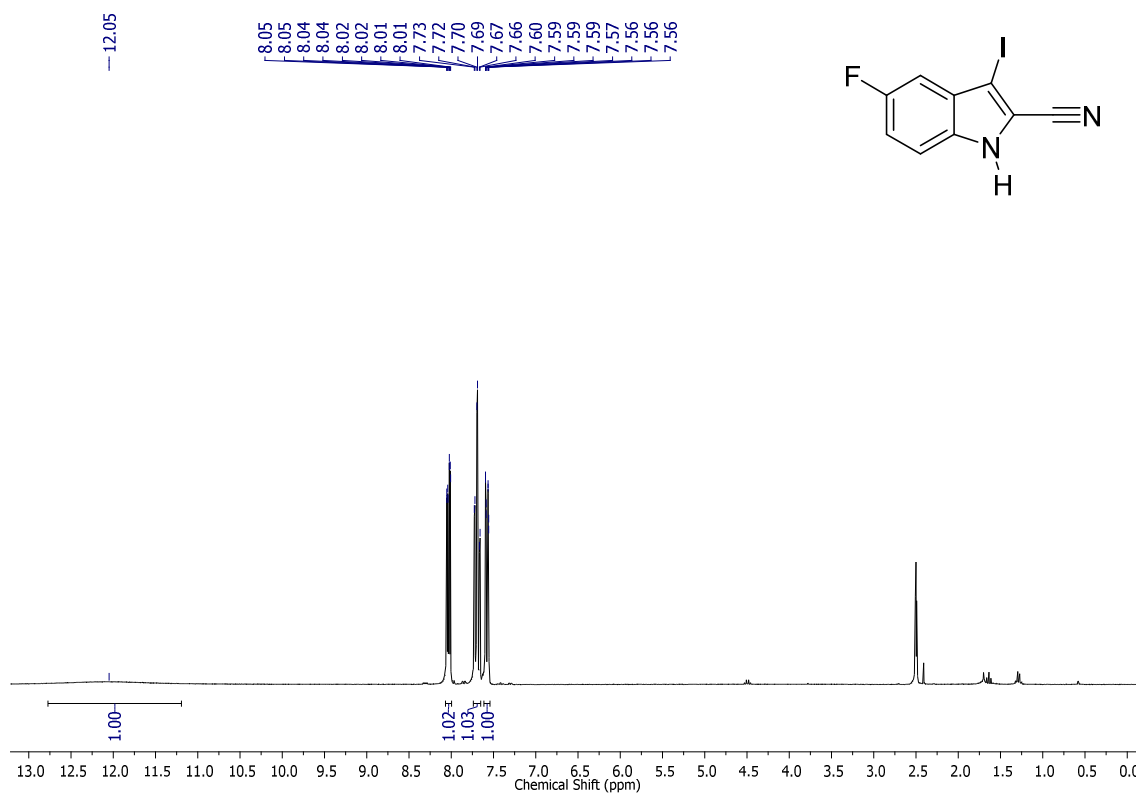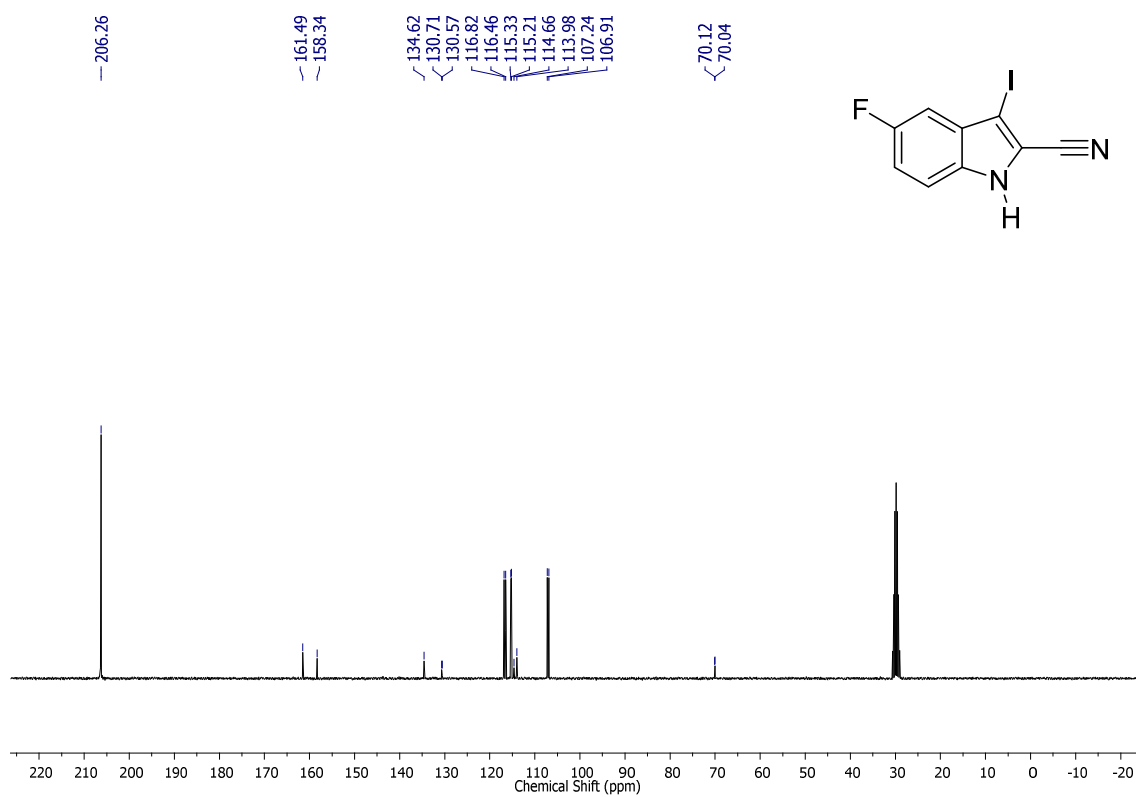

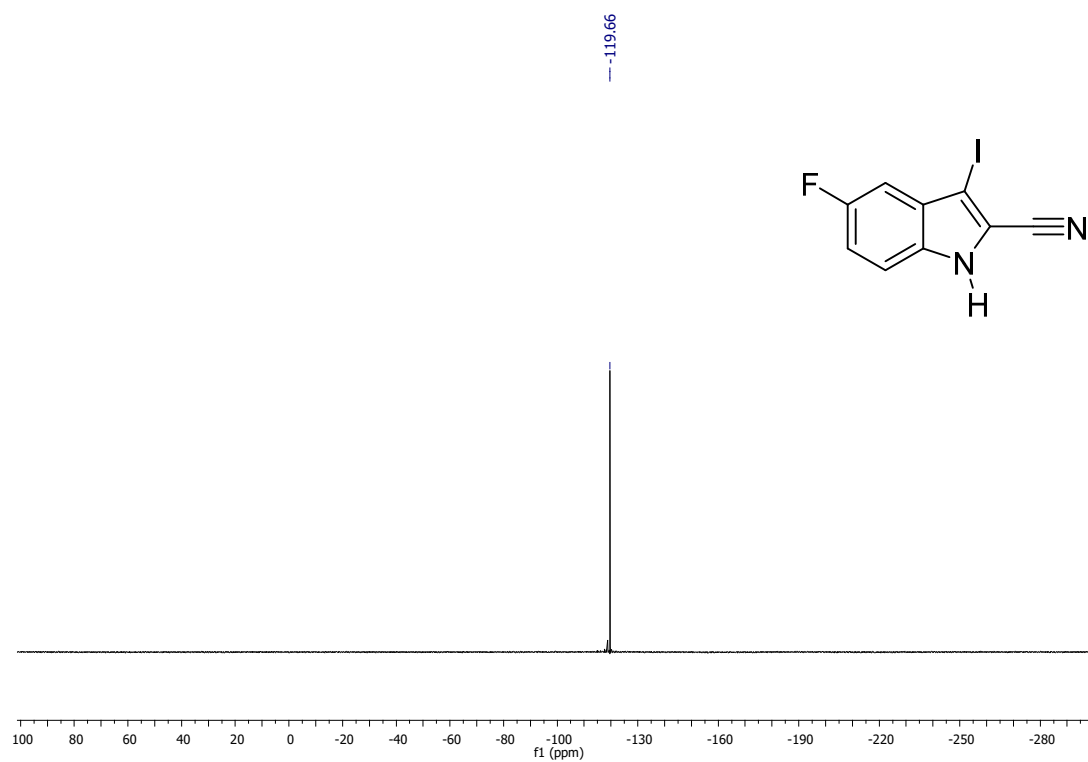

# 1-Benzyl-3-Iodo-1*H*-Indole-2-carboxamide (7a)

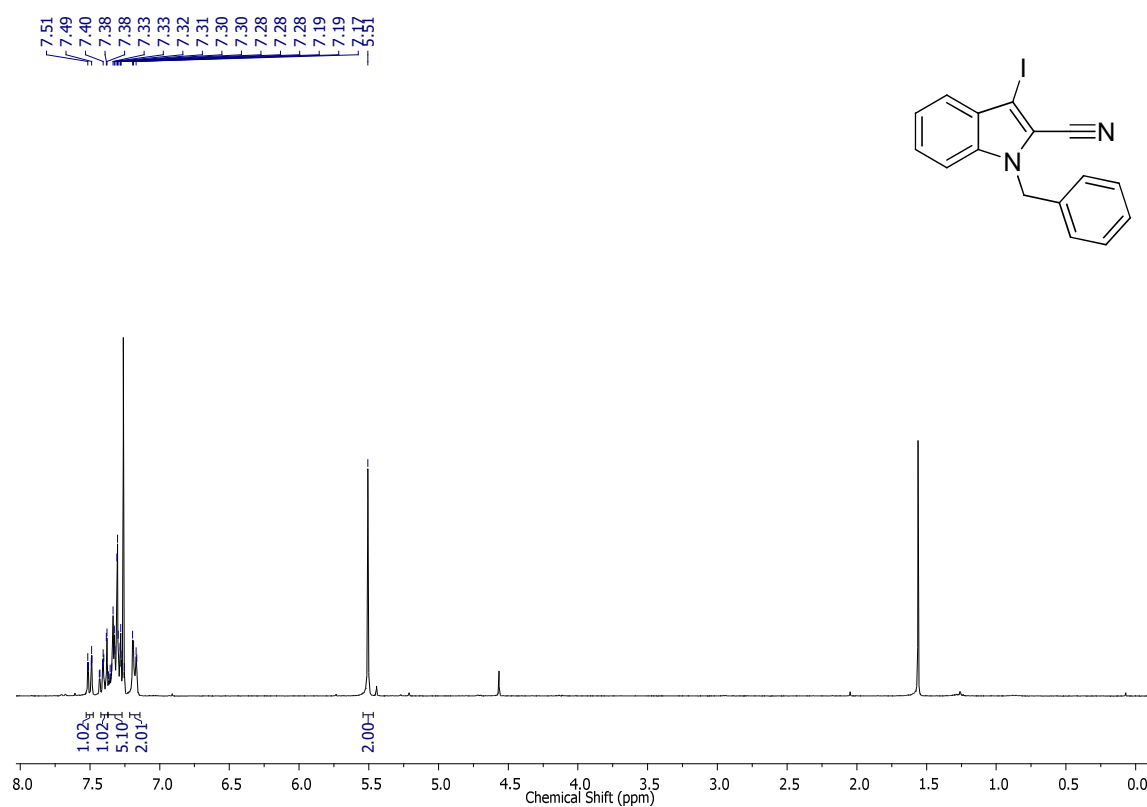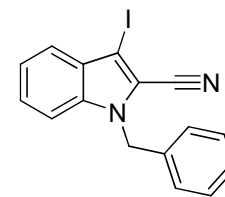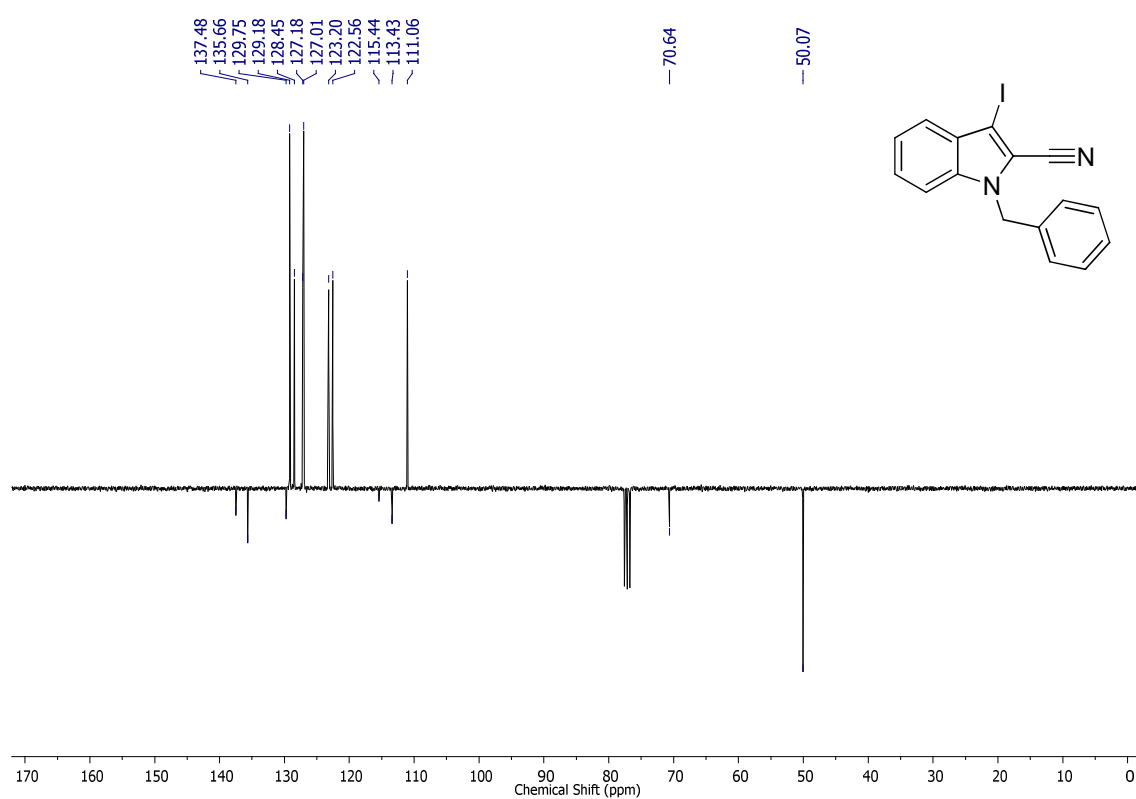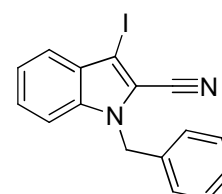

# 1-Benzyl-3-iodo-5-methoxy-1*H*-indole-2-carbonitrile (7b)

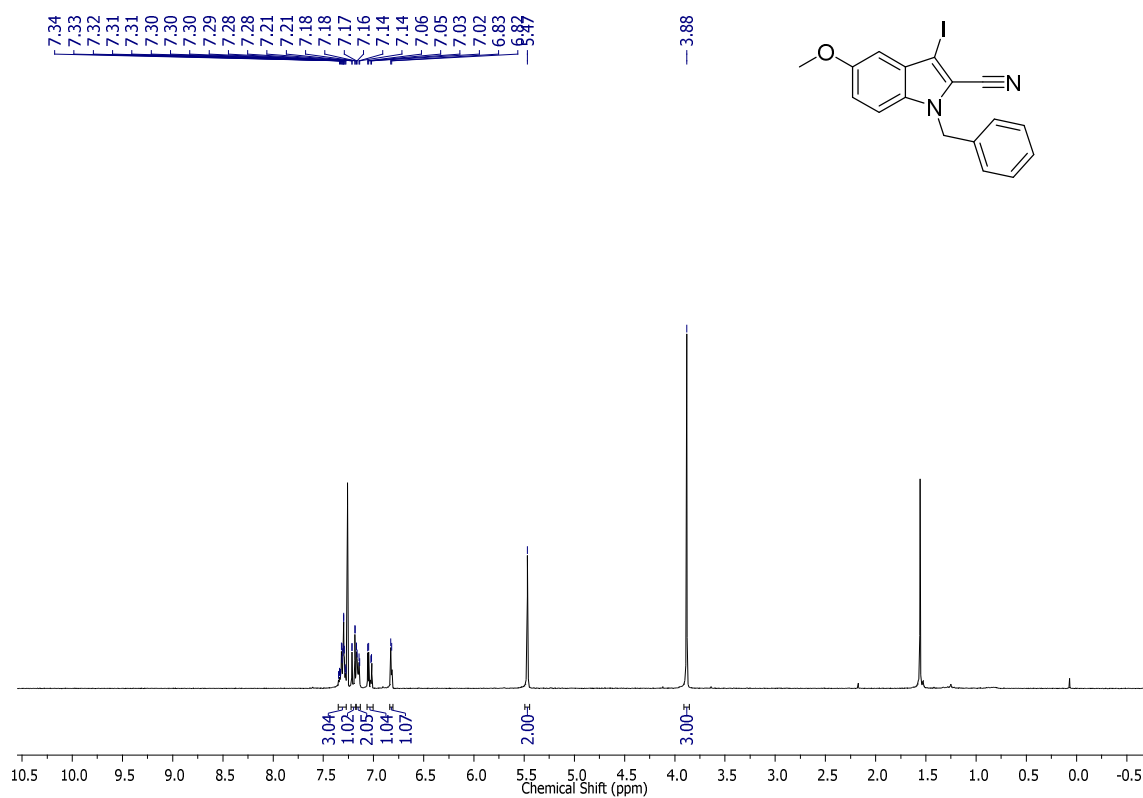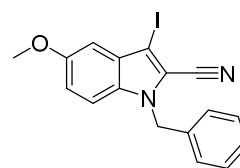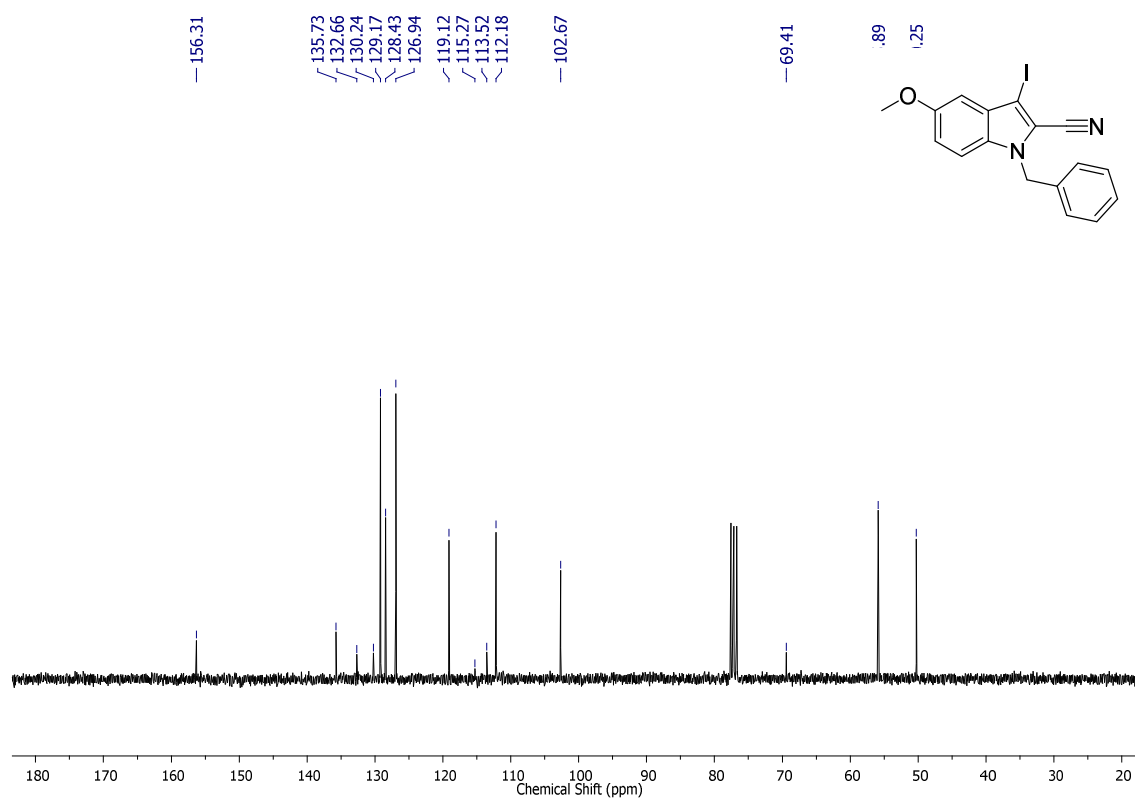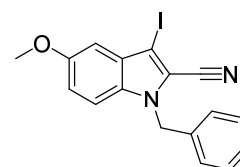

# 1-Benzyl-3-iodo-6-methoxy-1*H*-indole-2-carbonitrile (7c)

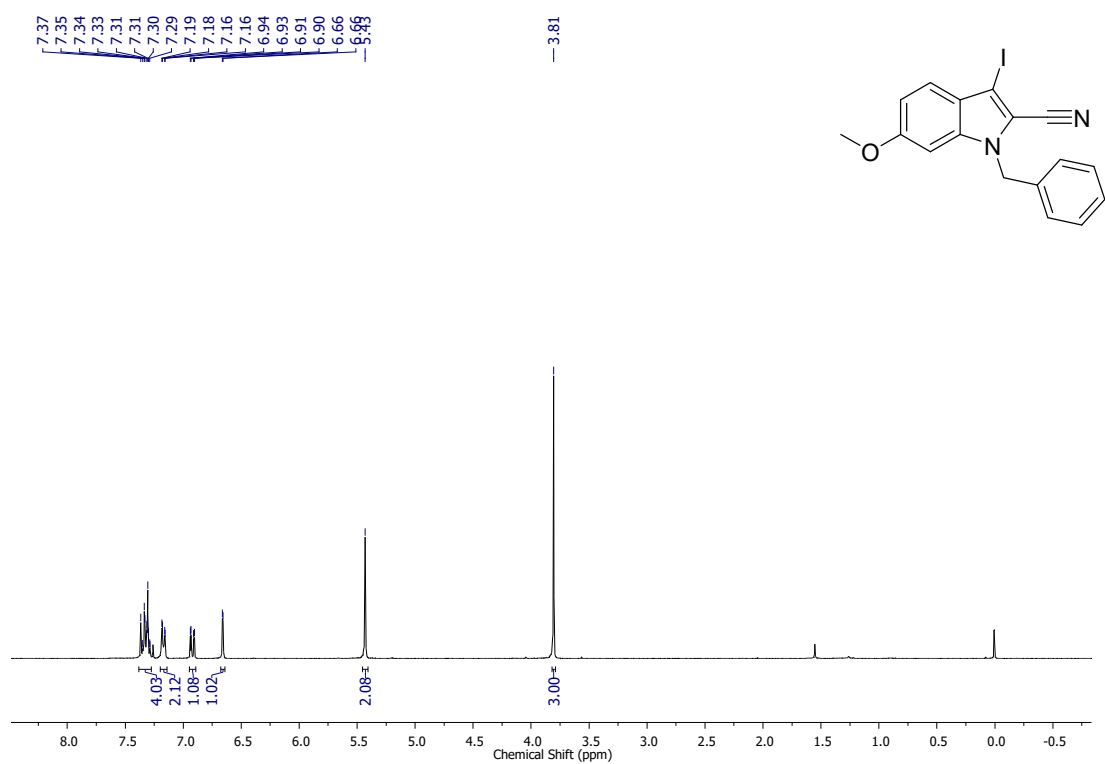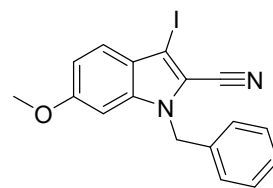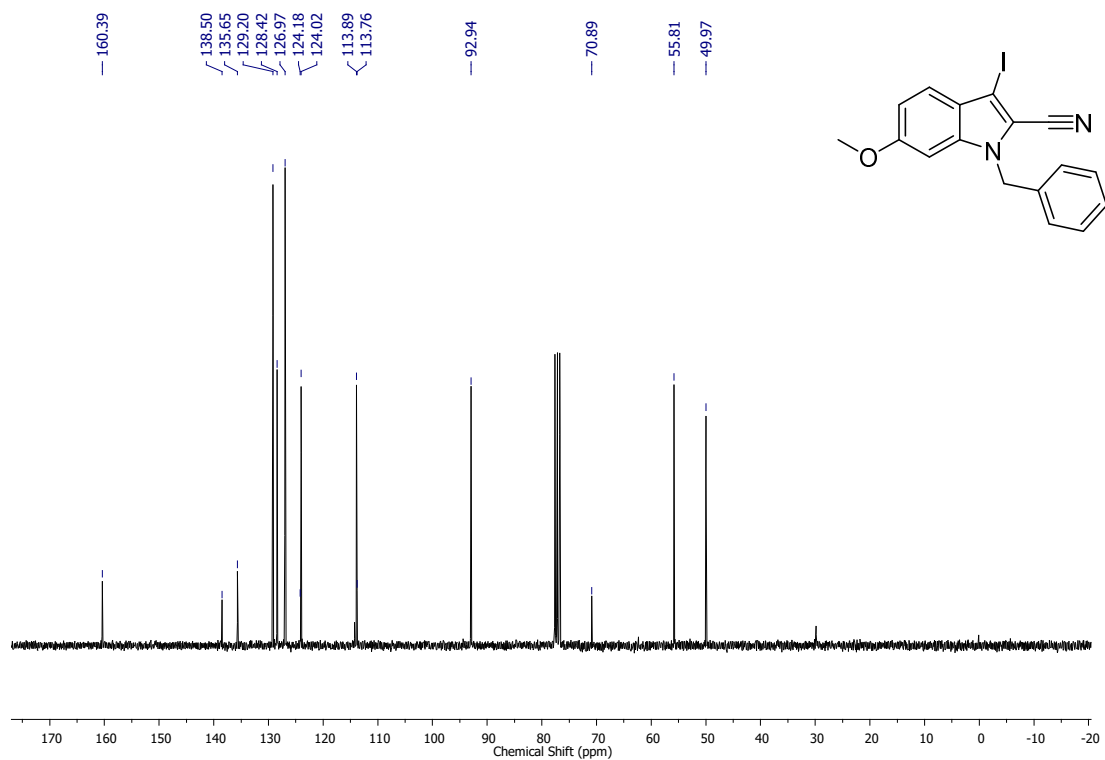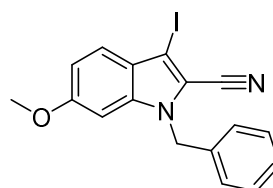

# 1-Benzyl-5-fluoro-3-iodo-1*H*-indole-2-carbonitrile (7d)

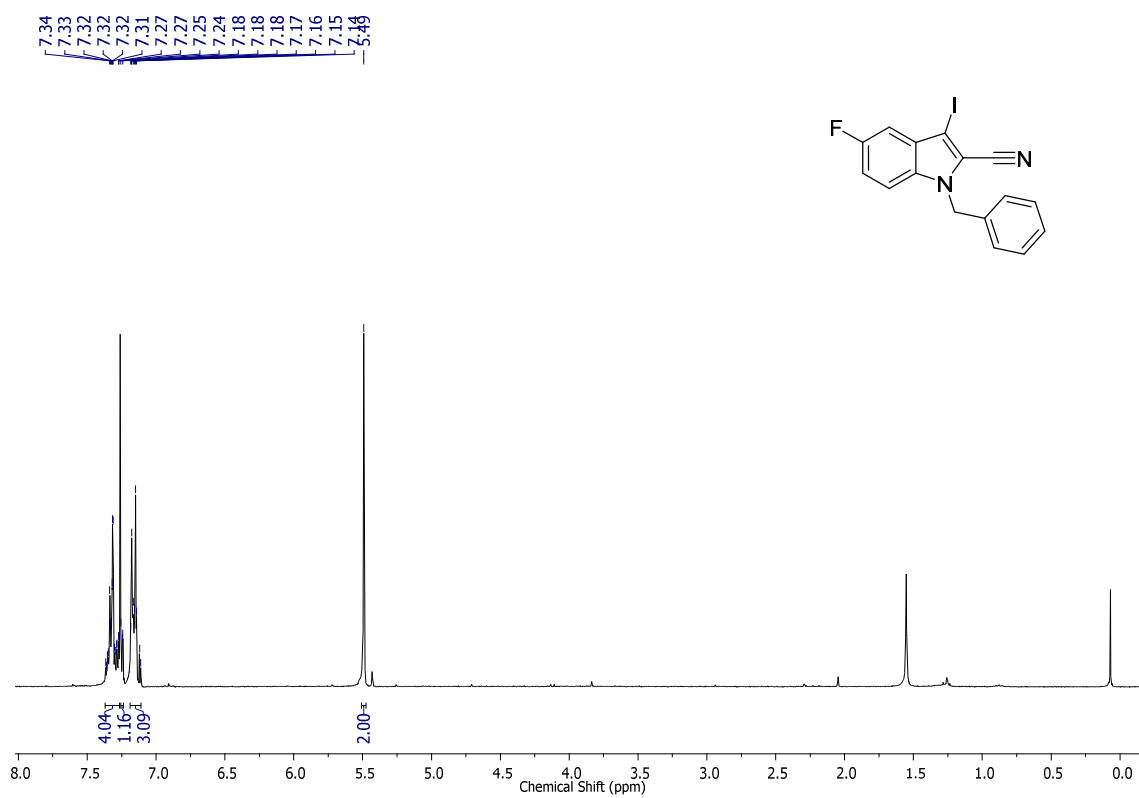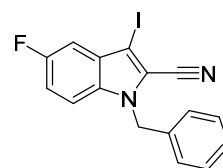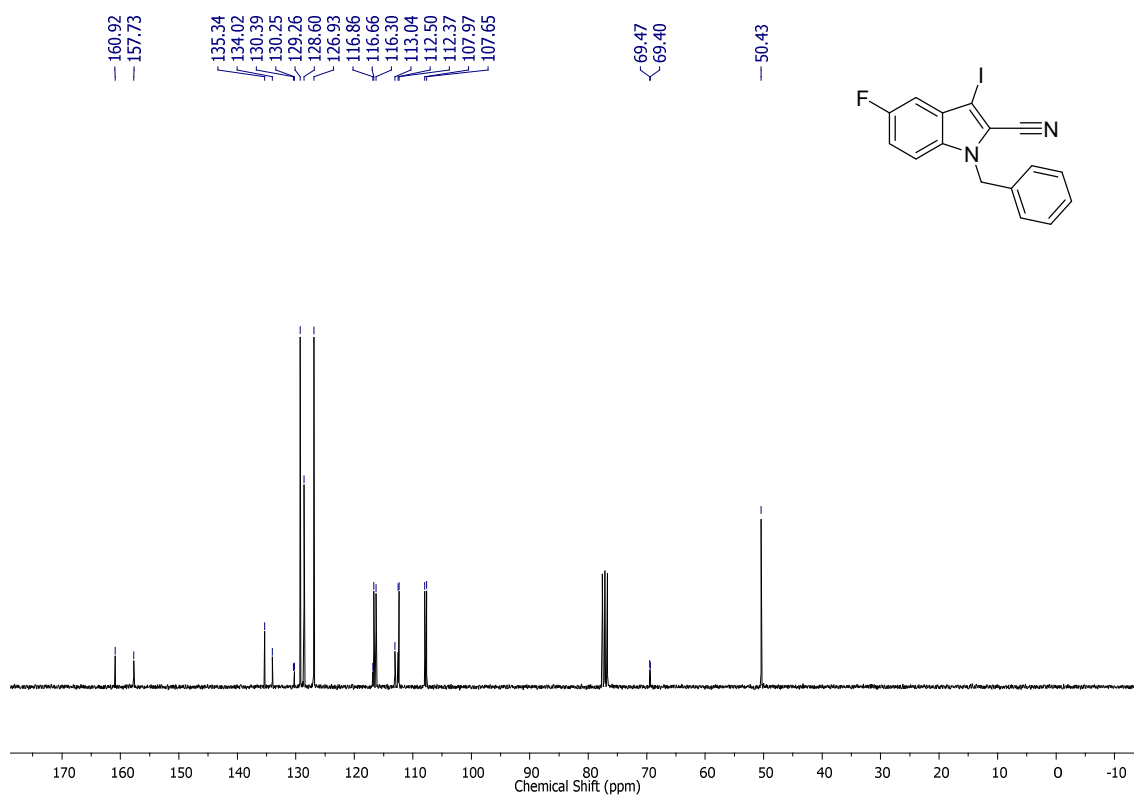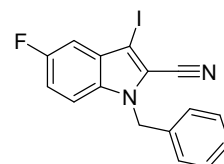

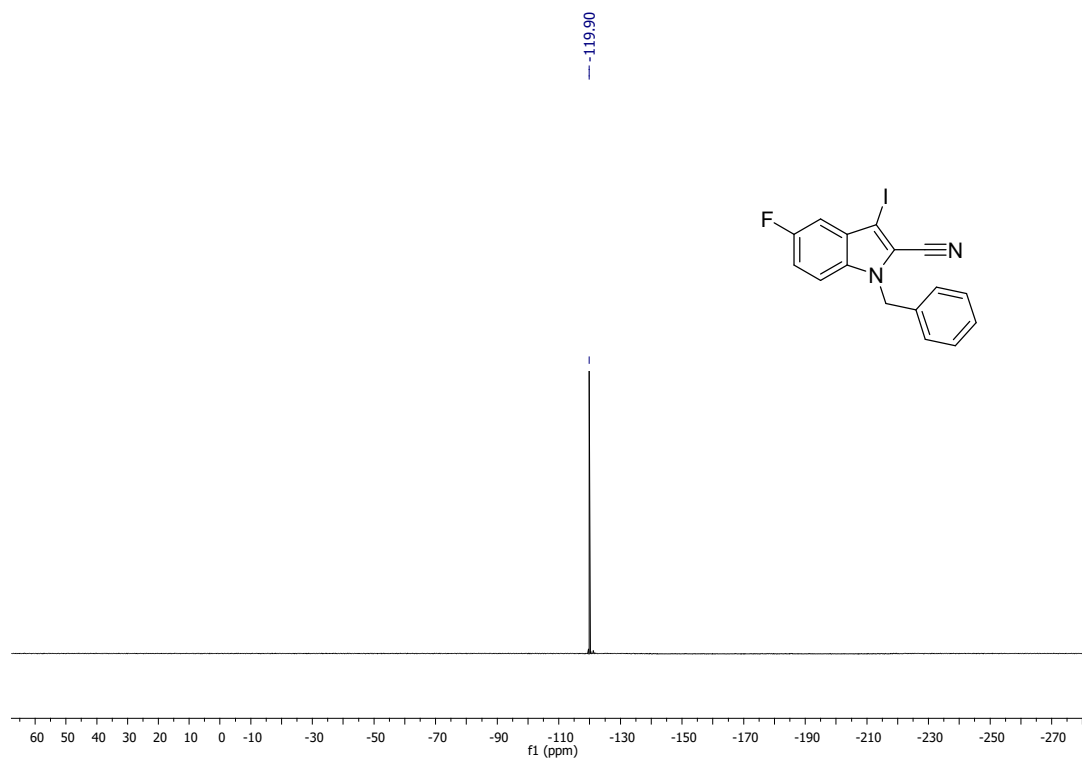

# 1-Benzyl-3-(phenylethynyl)-1*H*-indole-2-carbonitrile (8a)

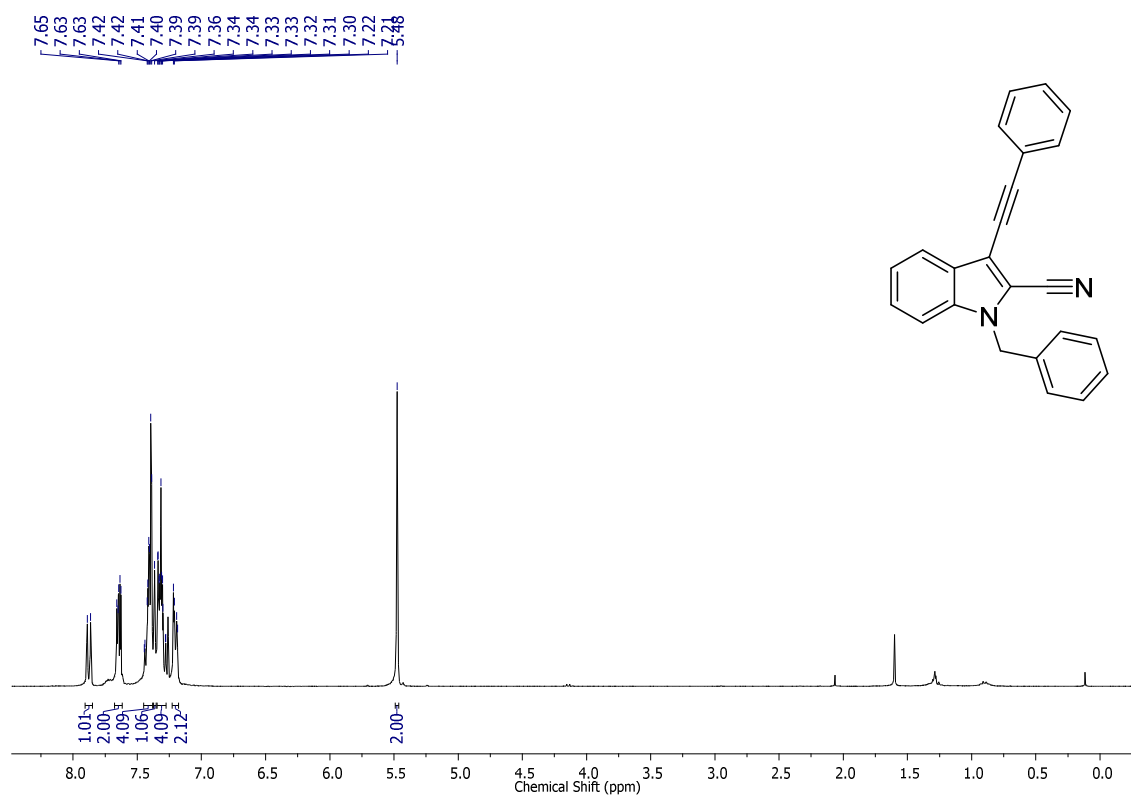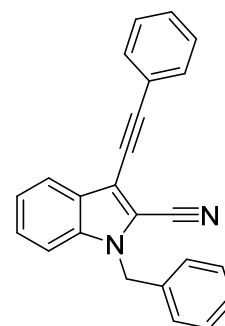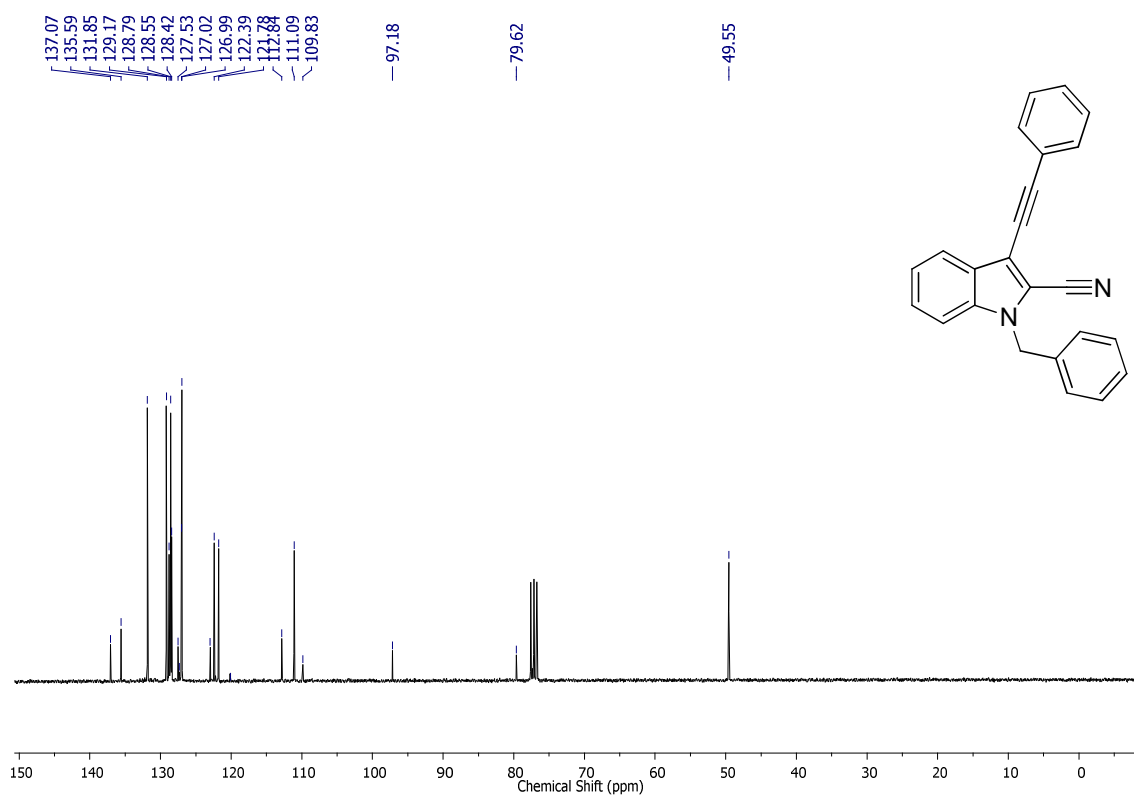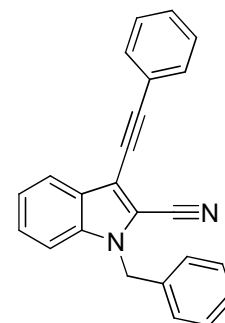



# 1-Benzyl-3-(*p*-tolylethynyl)-1*H*-indole-2-carbonitrile (8b)

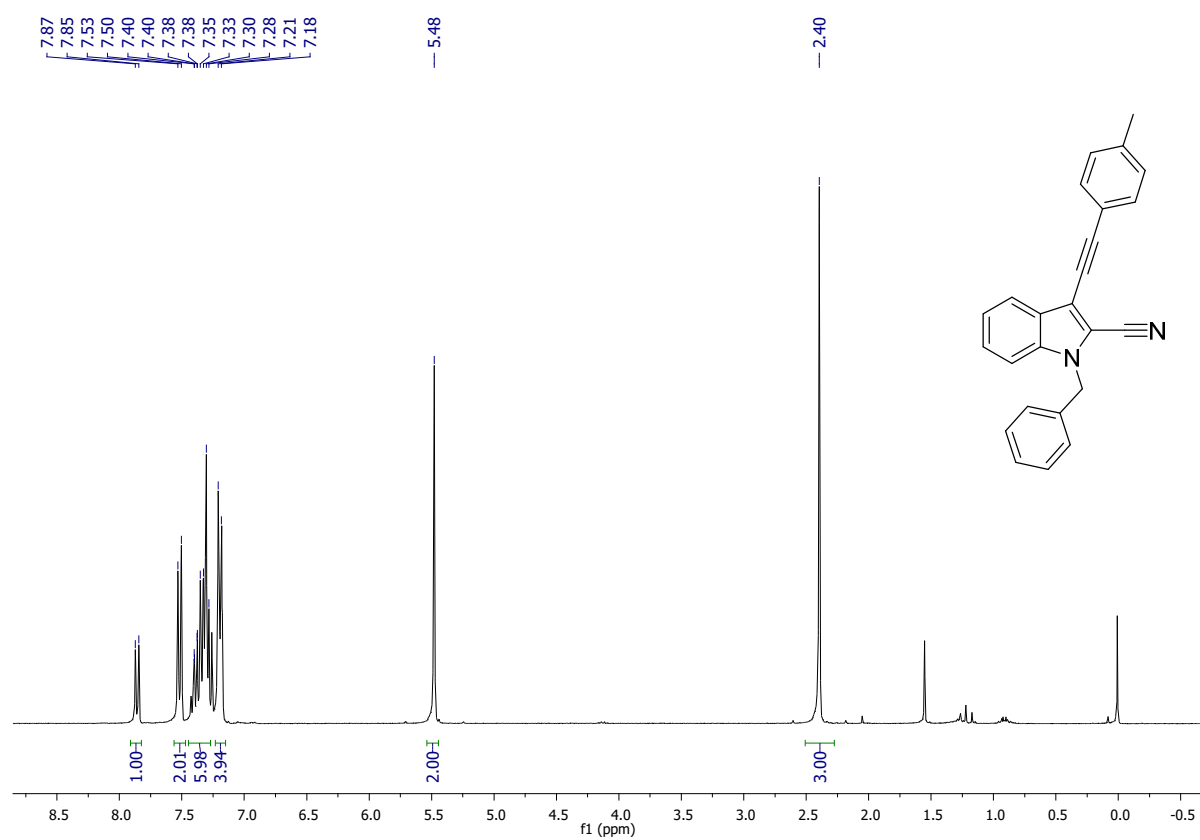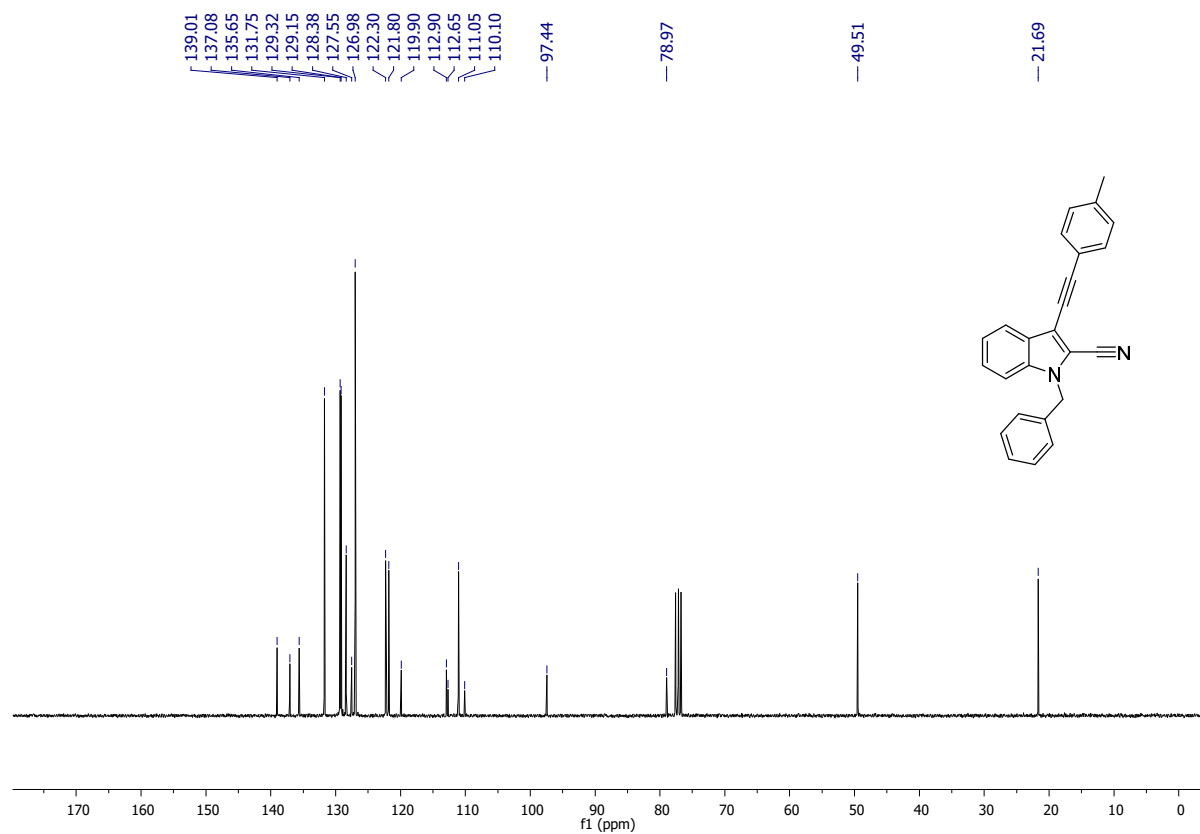

**1-Benzyl-3-((4-fluorophenyl)ethynyl)-1*H*-indole-2-carbonitrile (8c)**

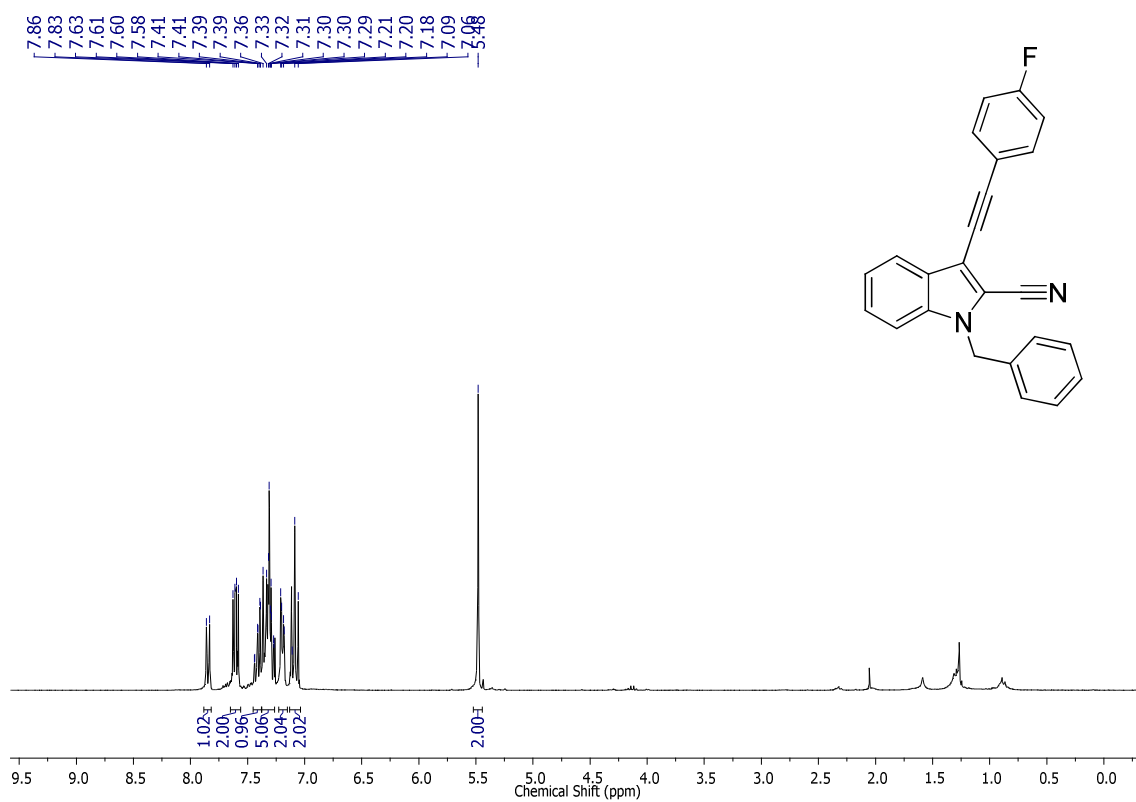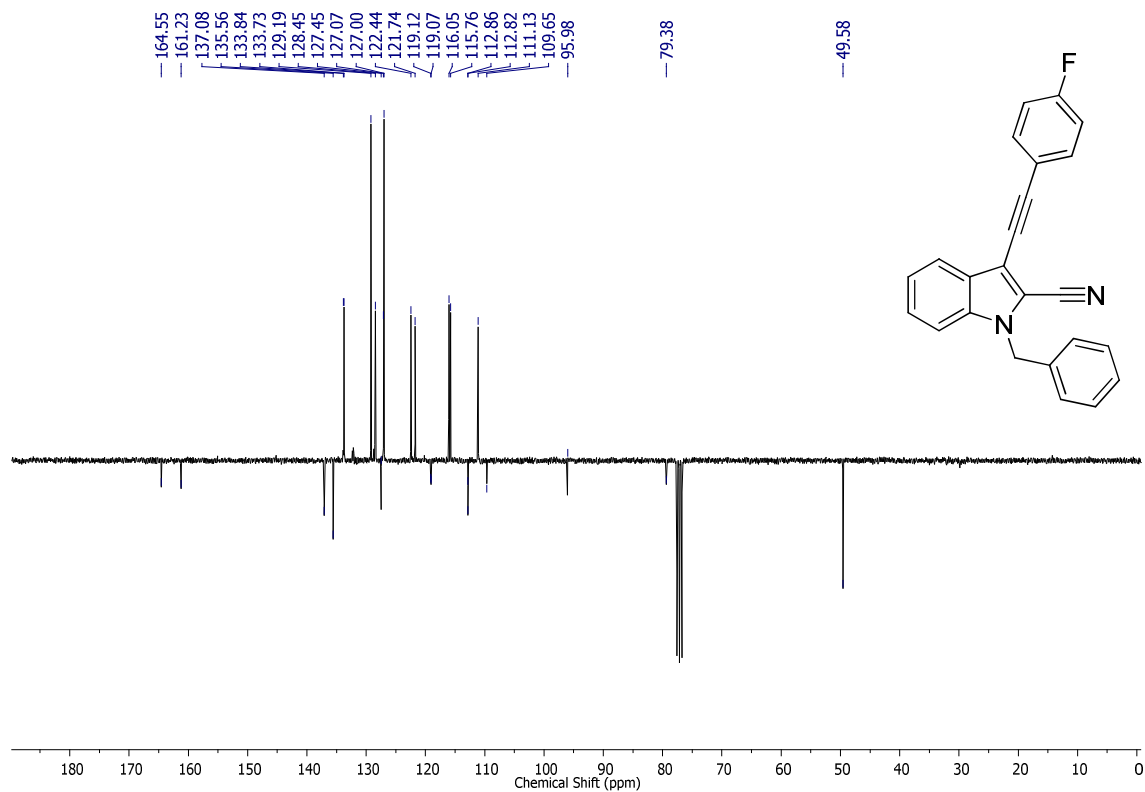

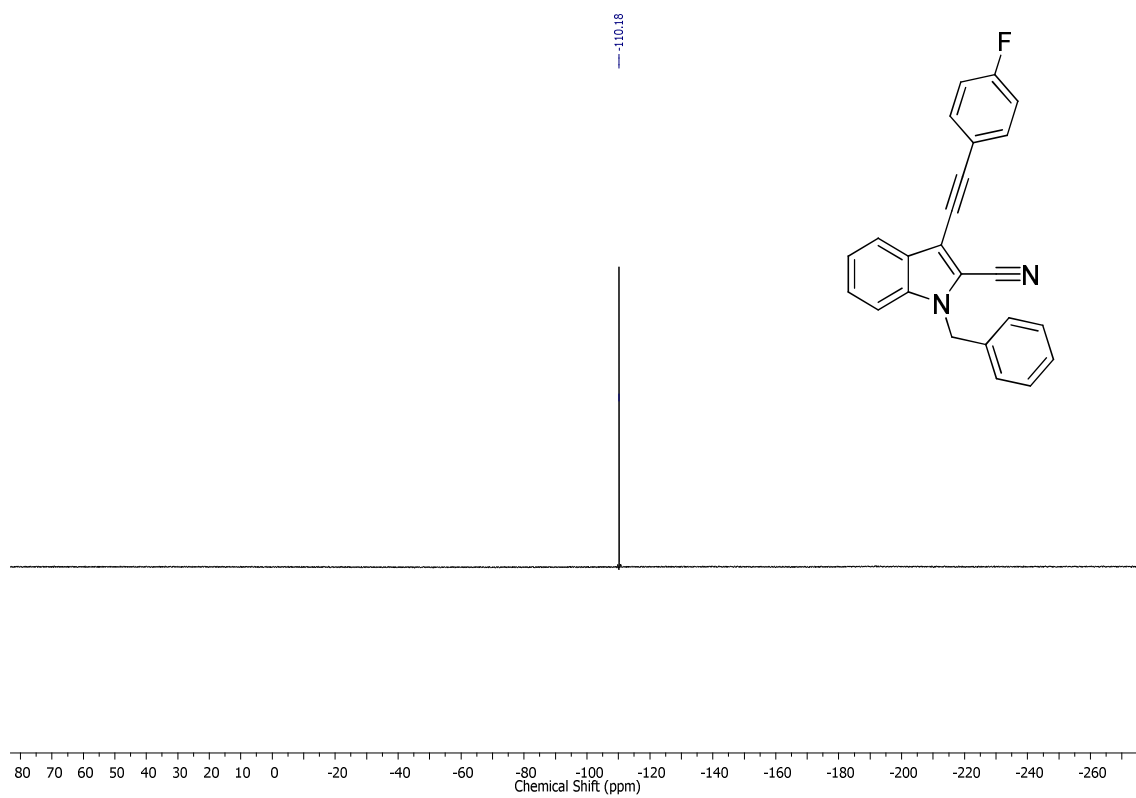

# 1-Benzyl-3-((4-methoxyphenyl)ethynyl)-1*H*-indole-2-carbonitrile (8d)

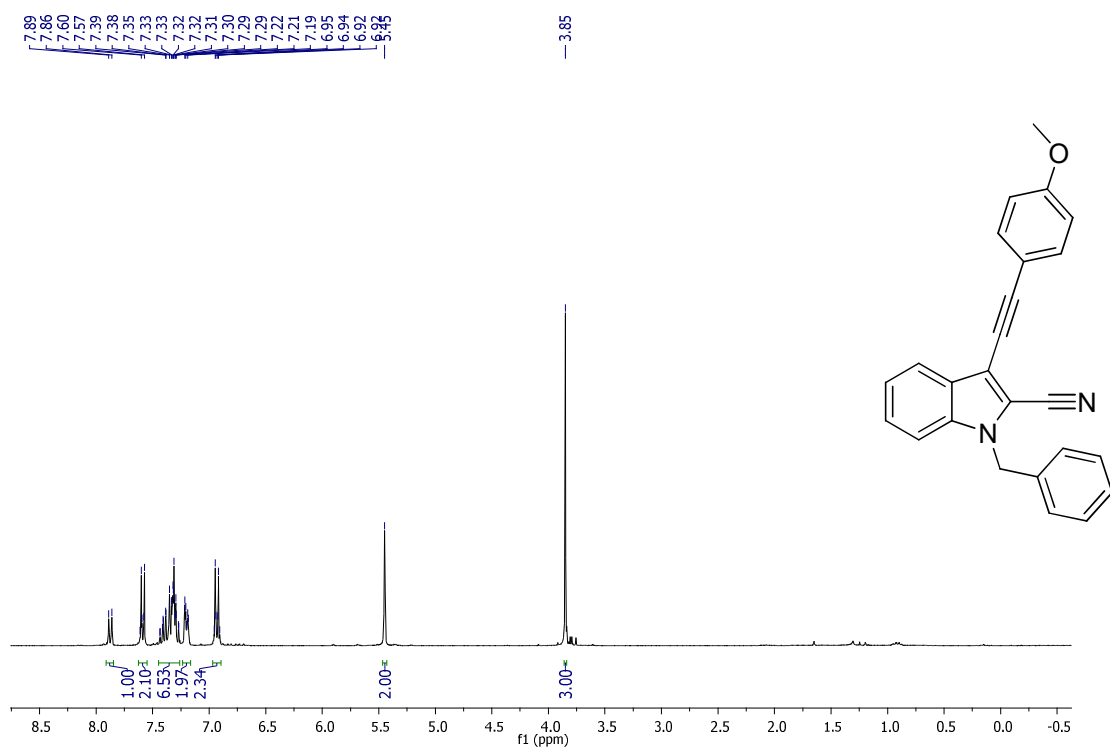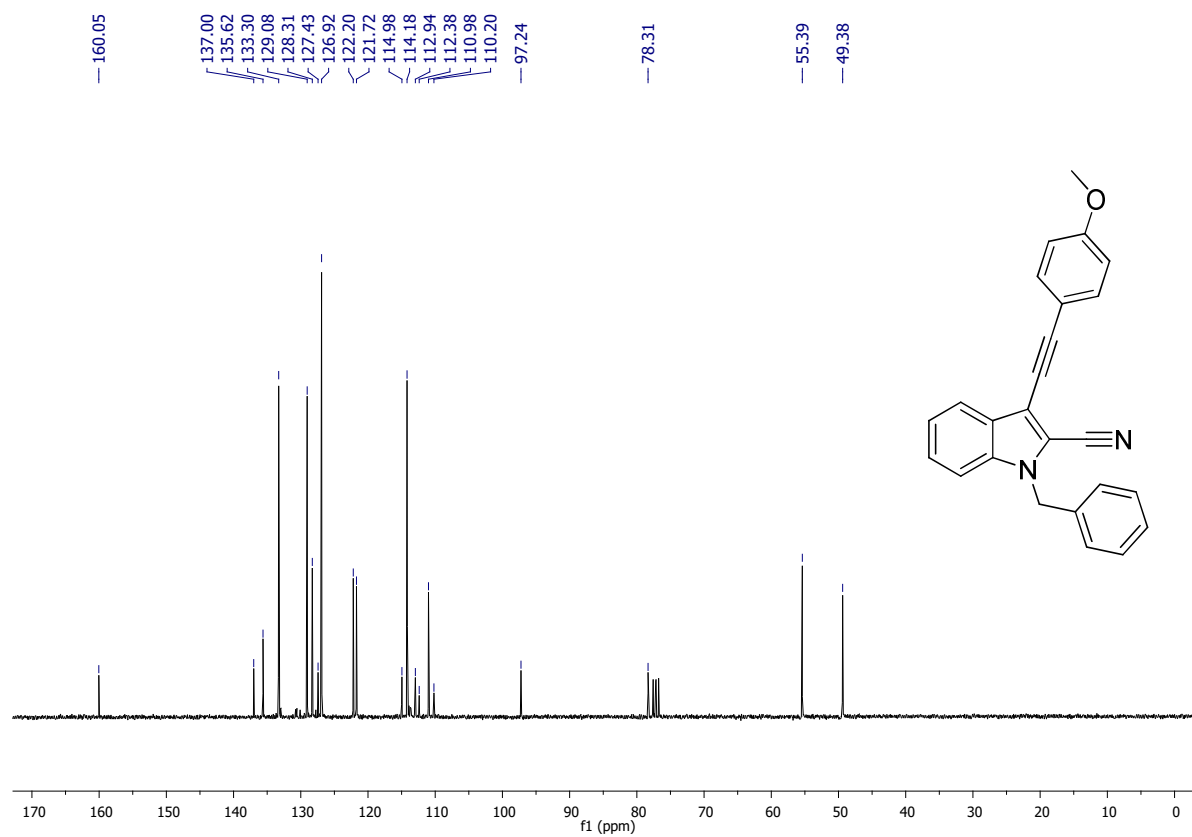

# 1-Benzyl-3-((4-ethylphenyl)ethynyl)-1H-Indole-2-Carbonitrile (8e)

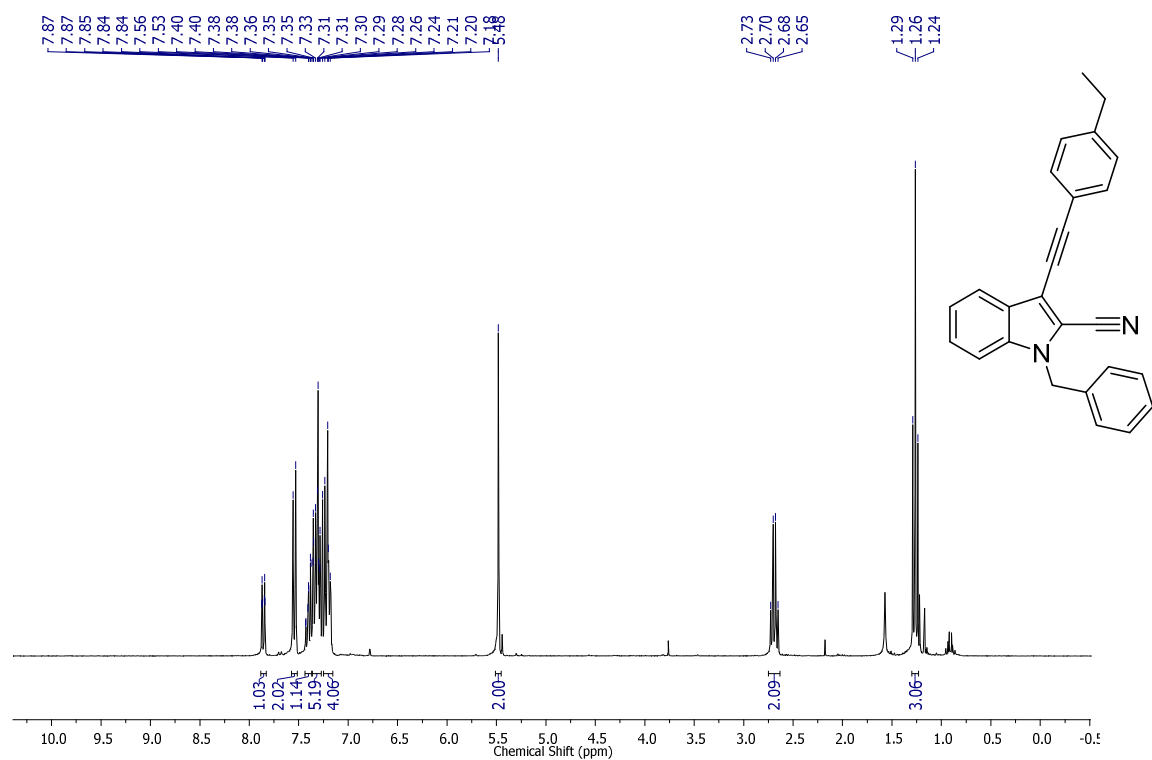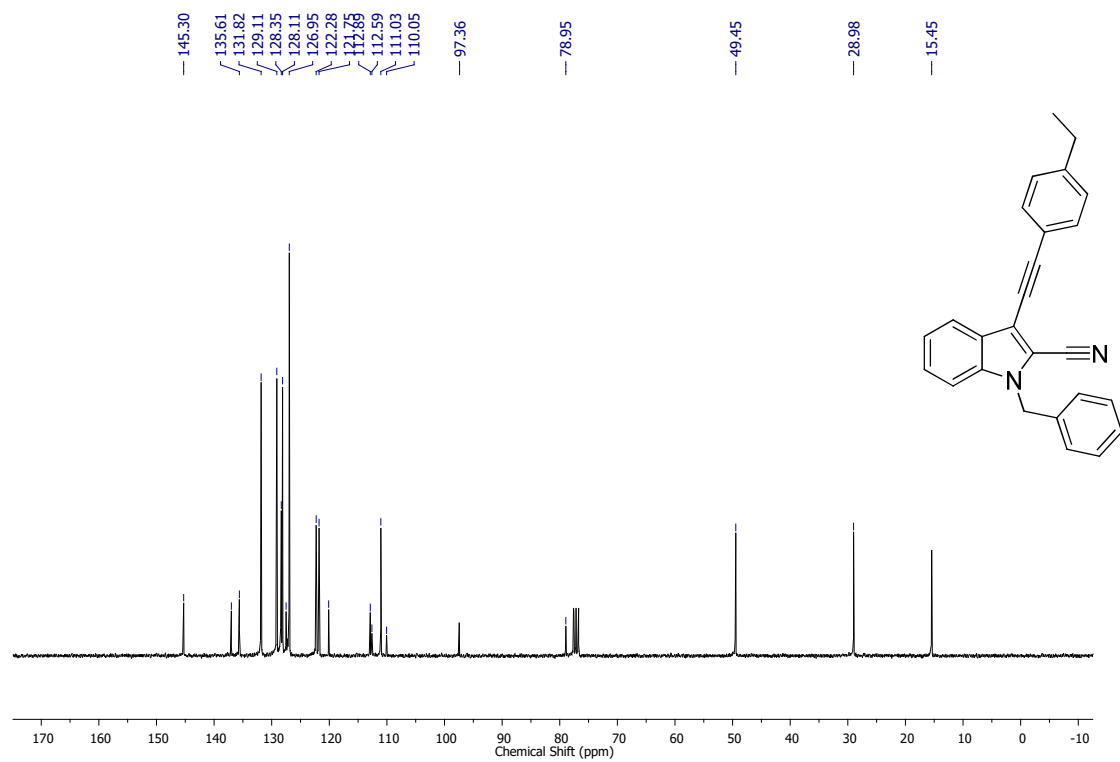

# 1-Benzyl-3-(pyridin-2-yl-ethynyl)-1H-Indole-2-Carbonitrile (8f)

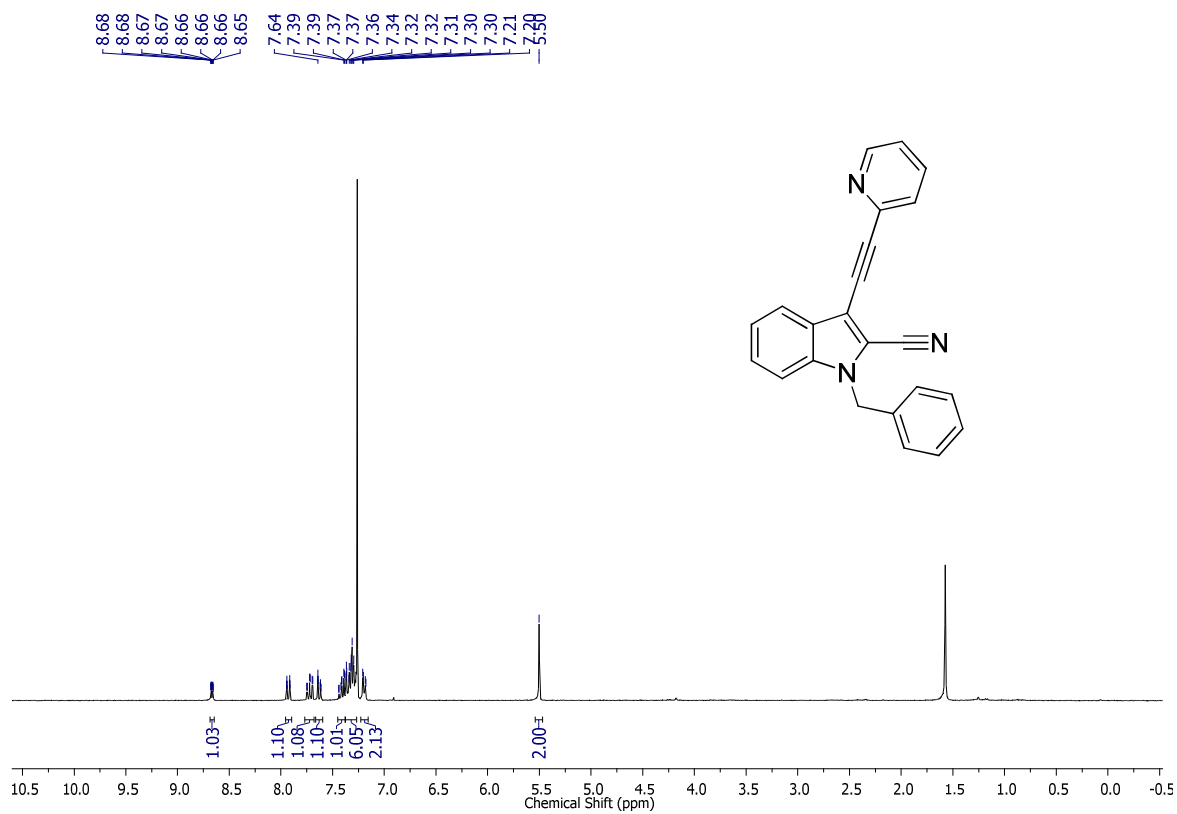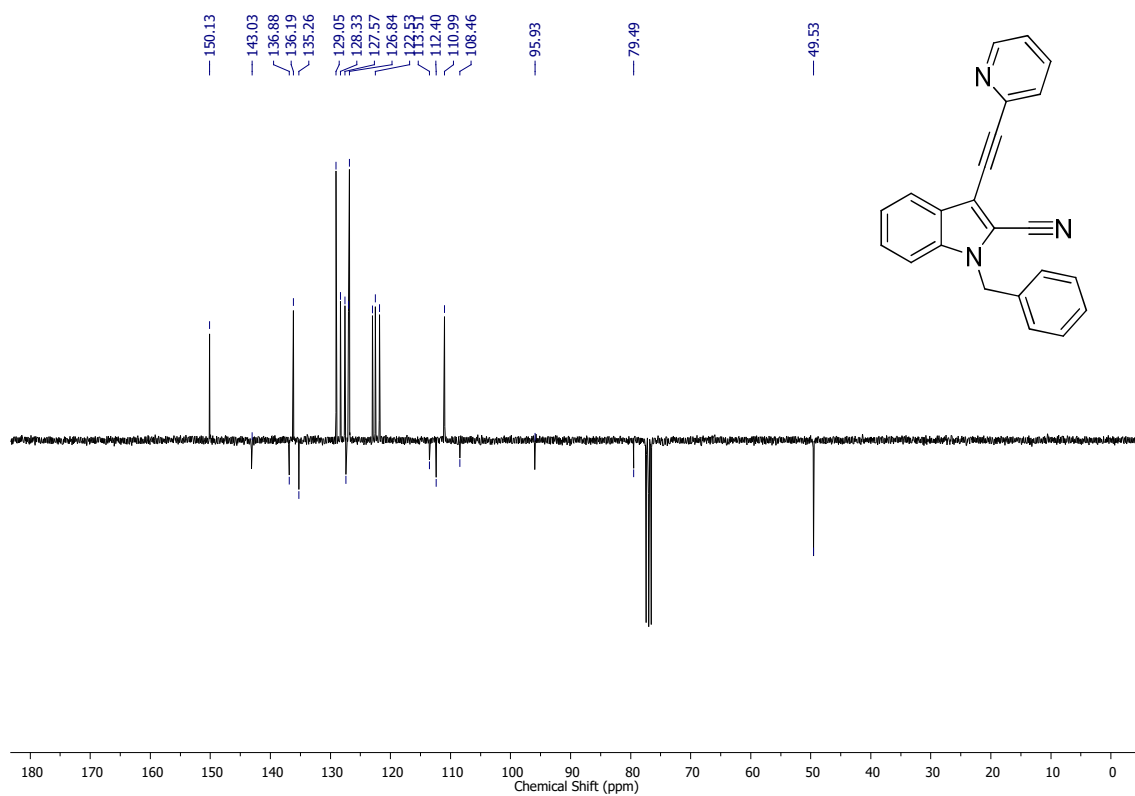

# 1-Benzyl-3-((2-fluorophenyl)ethynyl)-1*H*-indole-2-carbonitrile (8g)

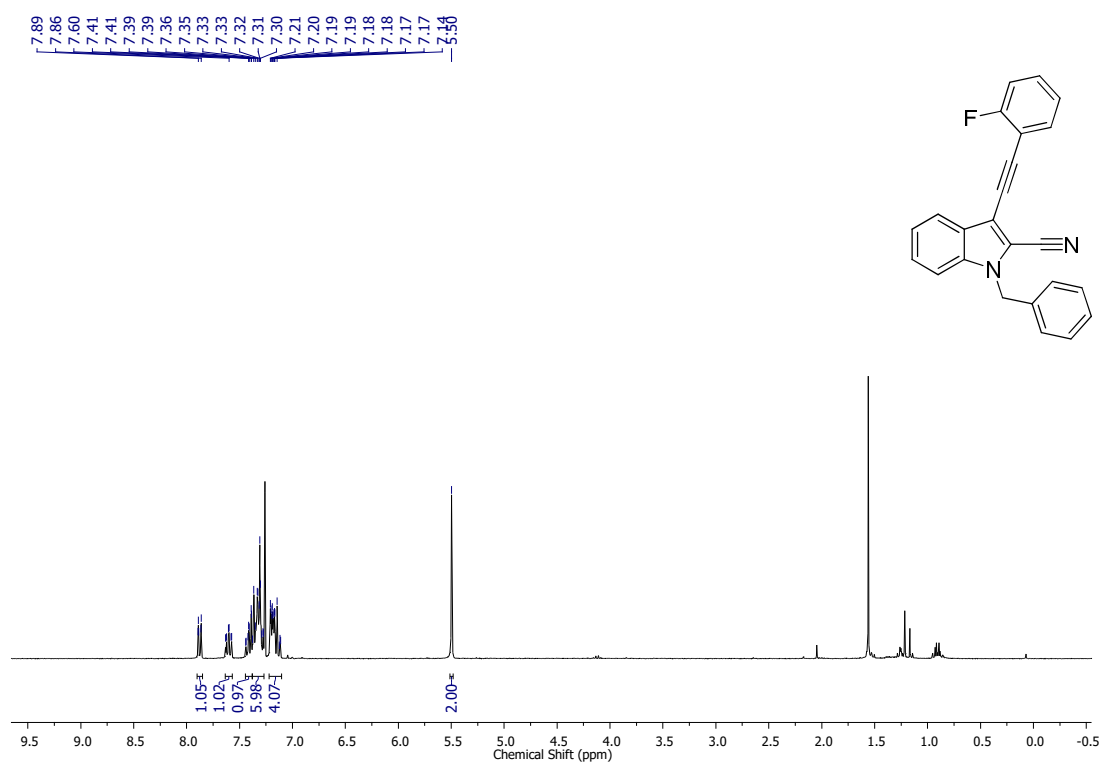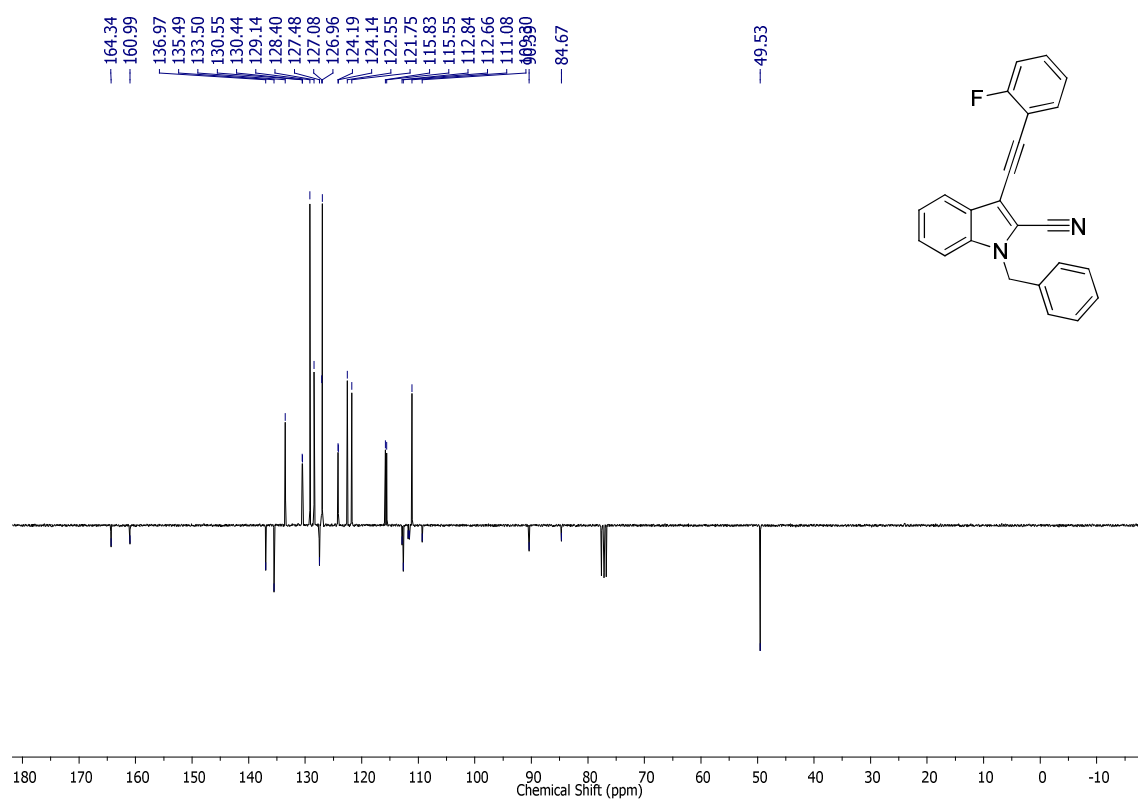

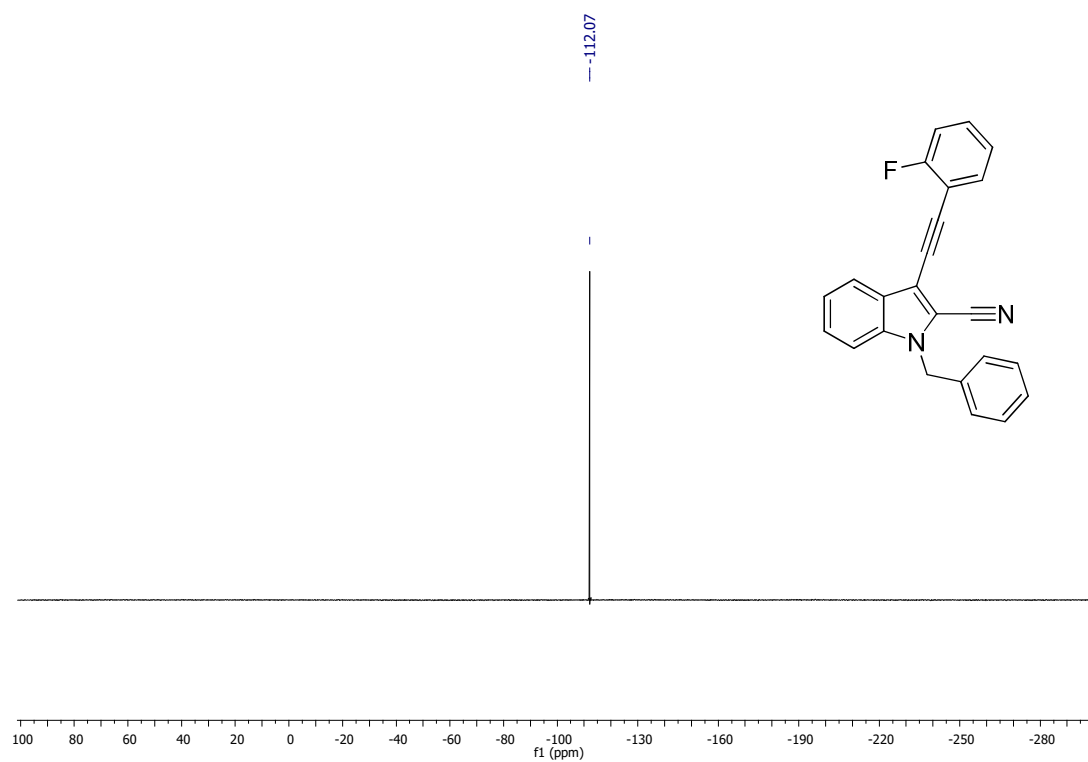



**1-Benzyl-5-methoxy-3-((4-methoxyphenyl)ethynyl)-1*H*-indole-2-carbonitrile (8h)**

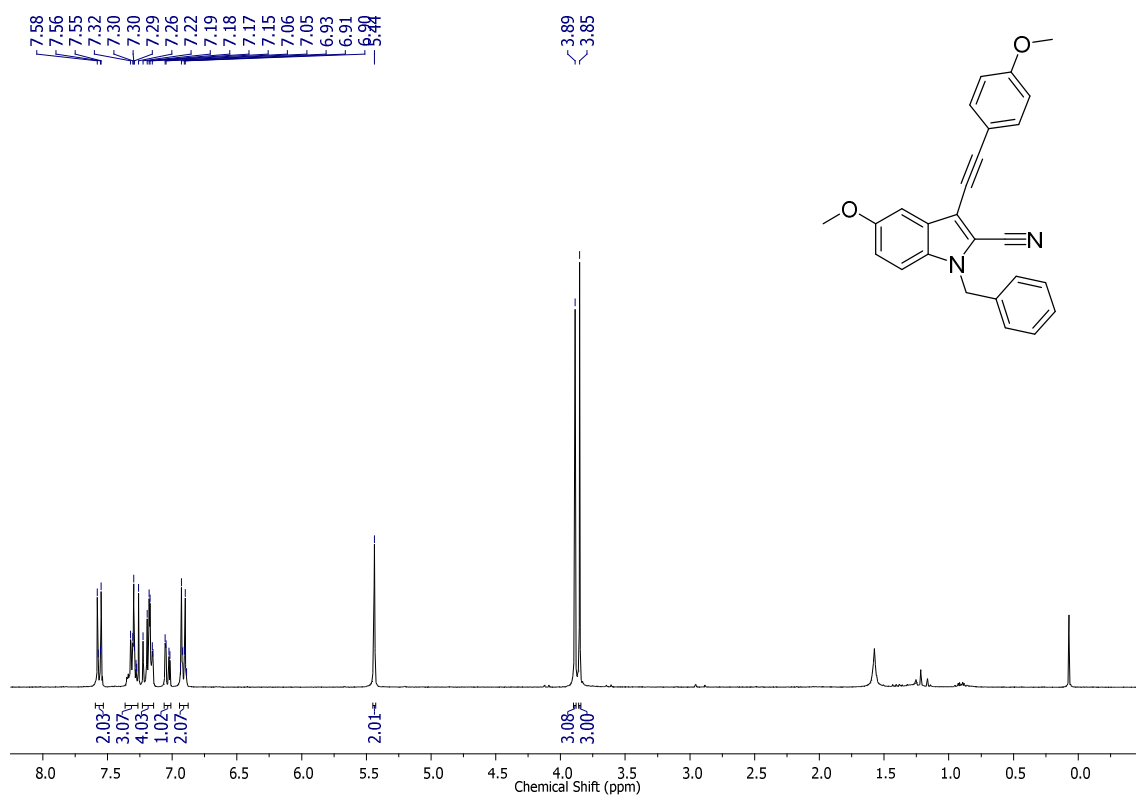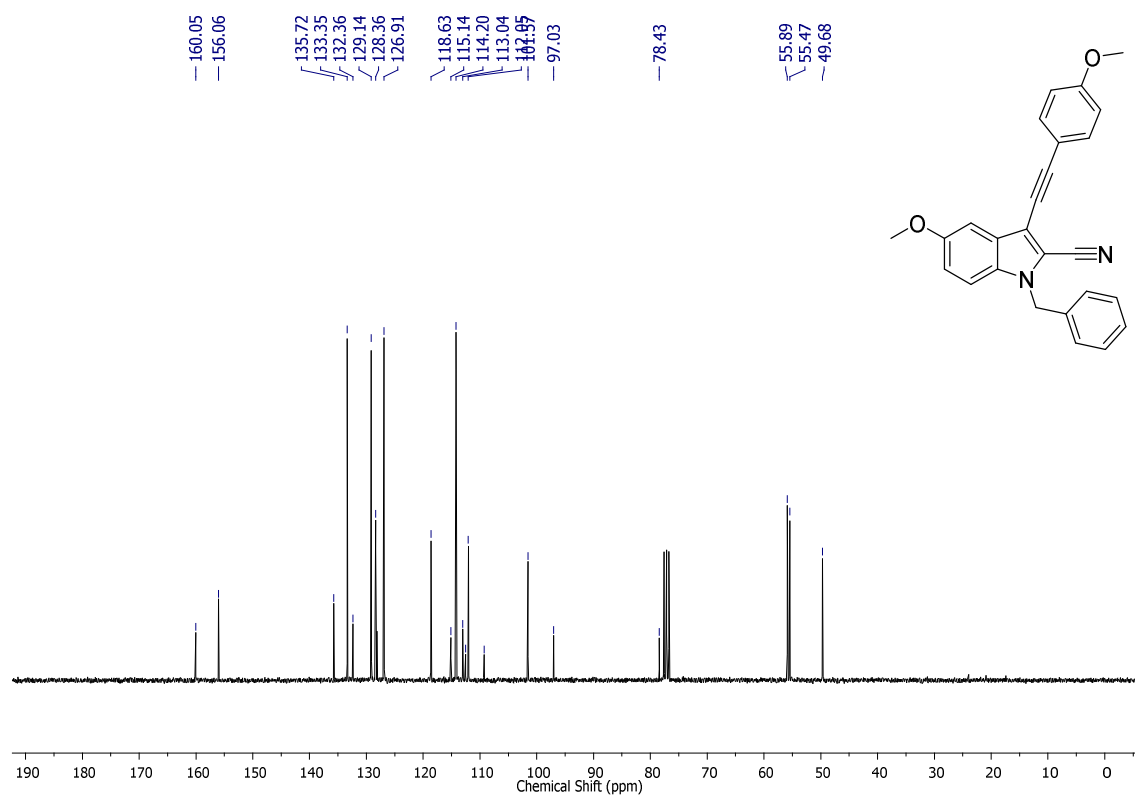

# 1-Benzyl-6-methoxy-3-((2-methoxyphenyl)ethynyl)-1*H*-indole-2-carbonitrile (8i)

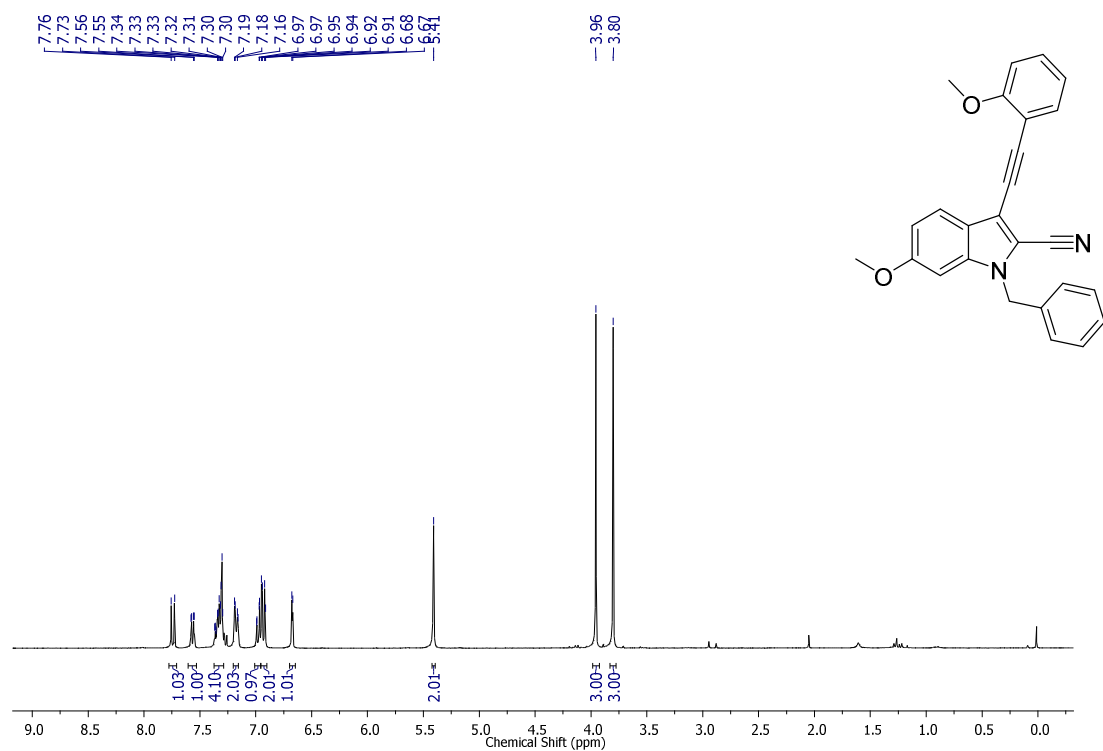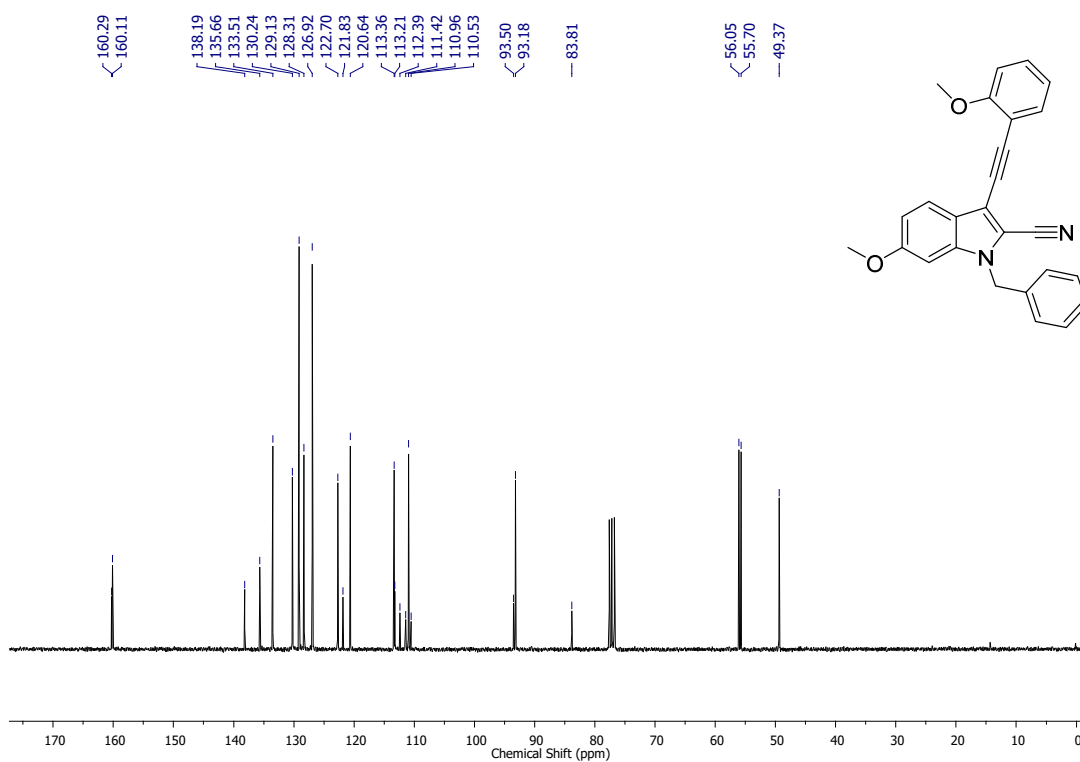

**1-Benzyl-5-fluoro-3-(*m*-tolylethynyl)-1*H*-indole-2-carbonitrile (8j)**

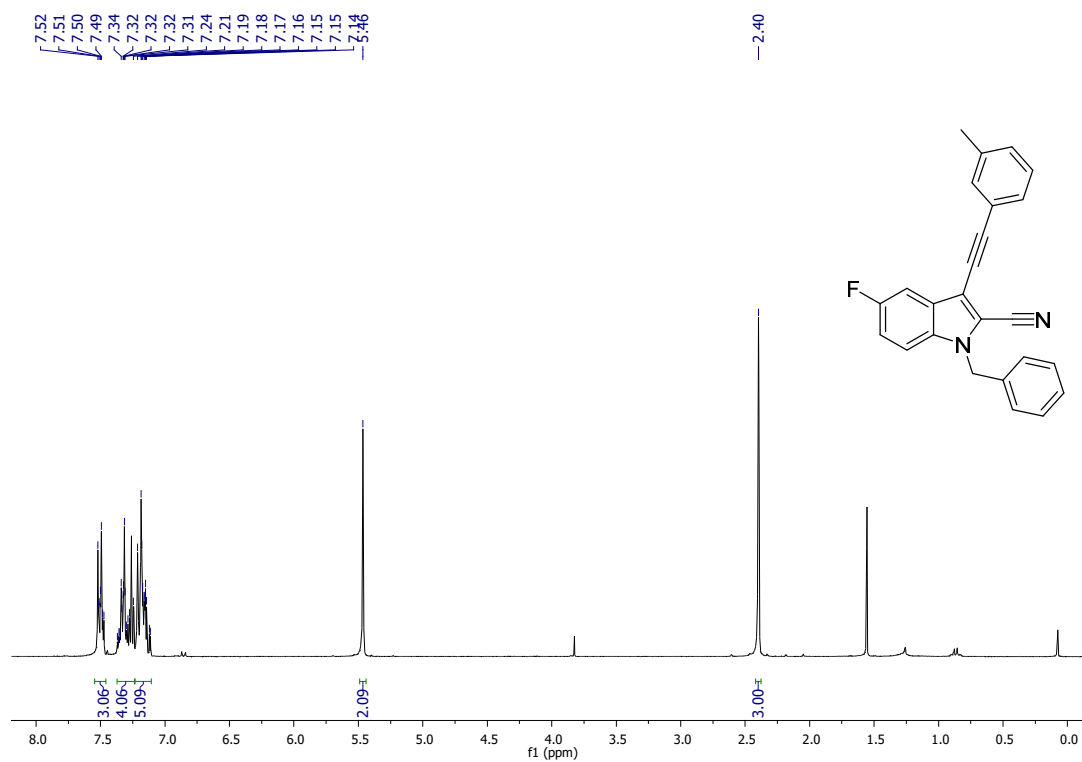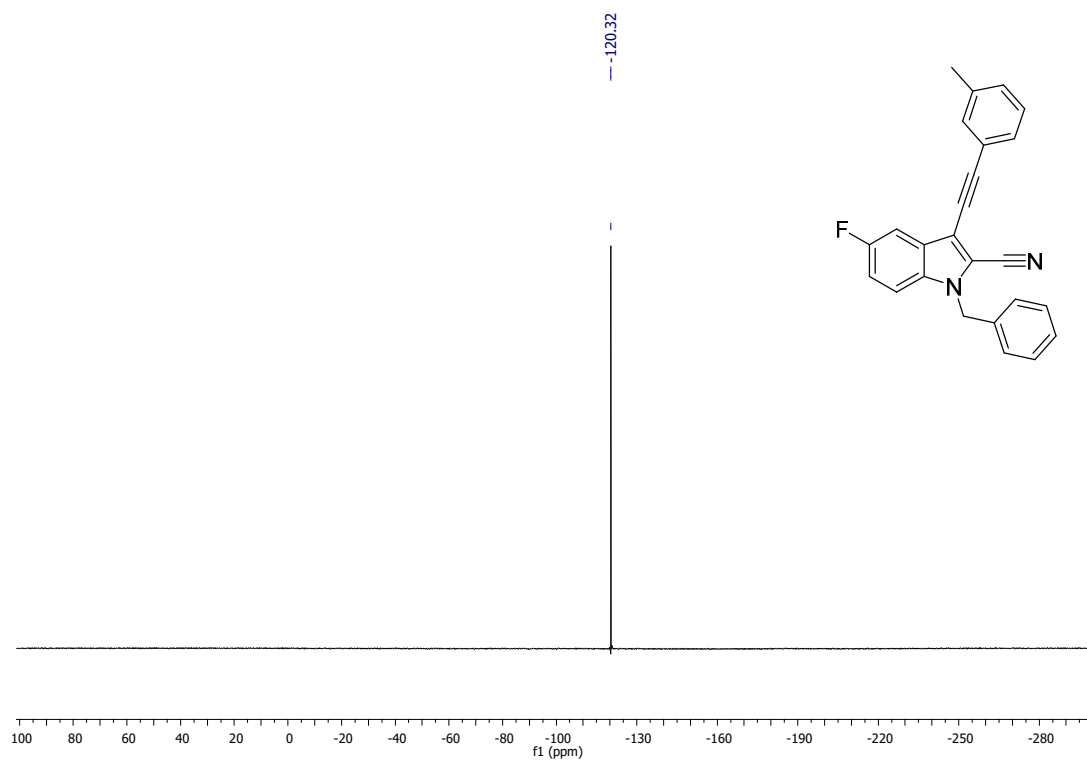

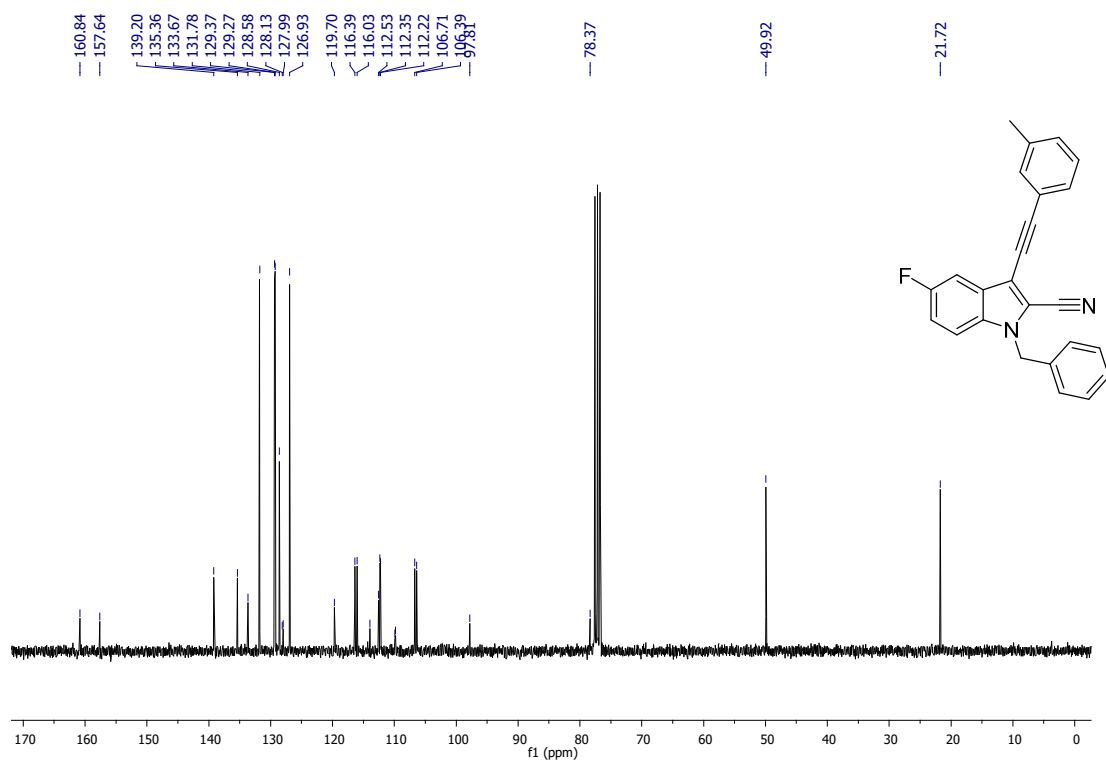

# 1-Benzyl-3-(4-methoxyphenyl)-1*H*-indole-2-carbonitrile (9a)

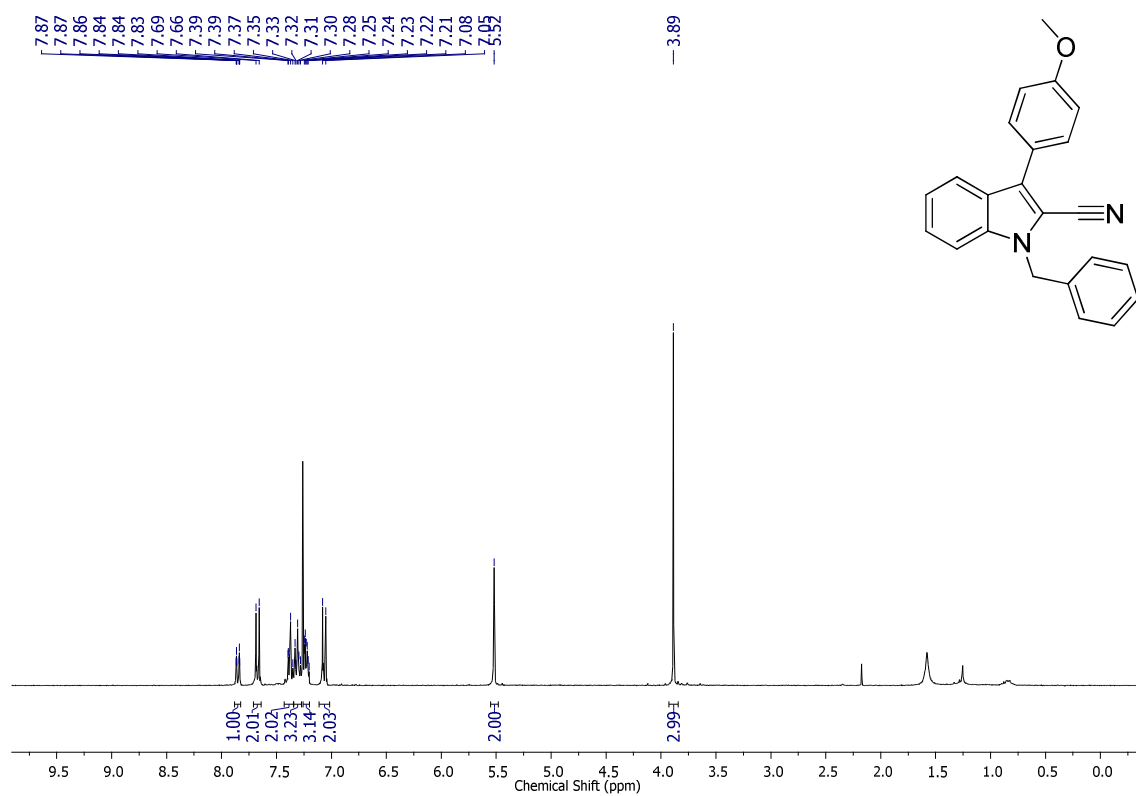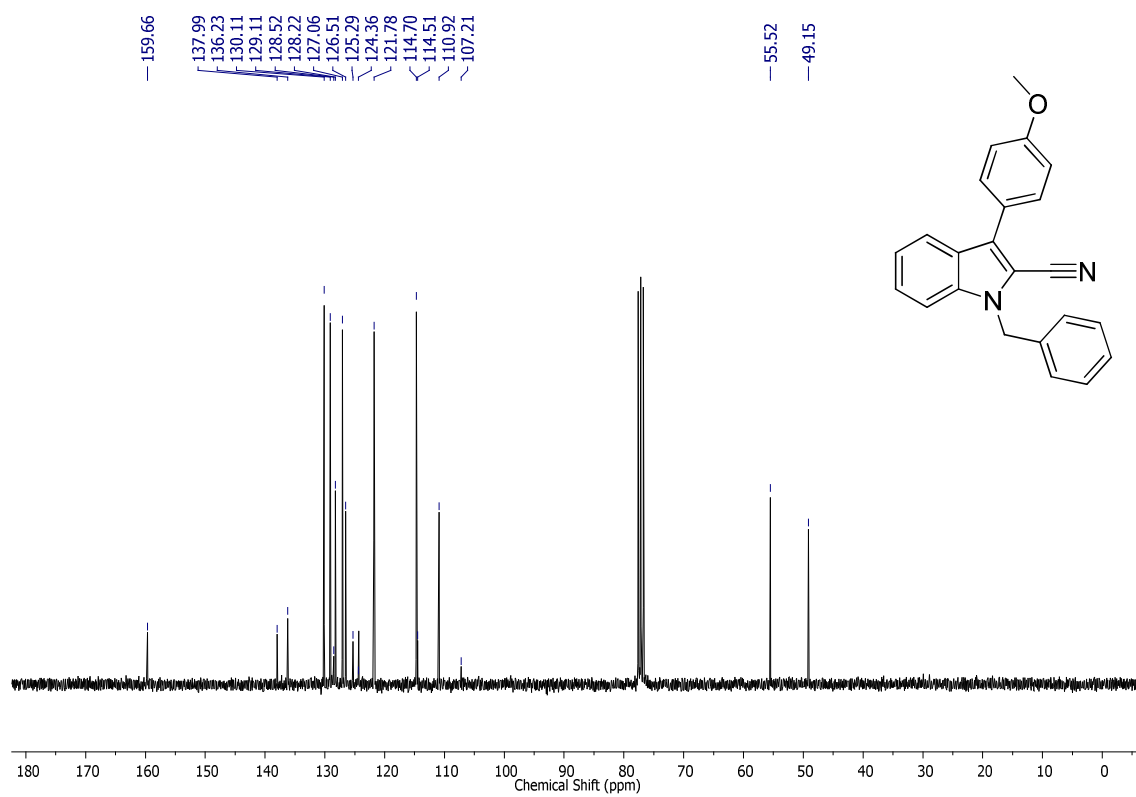

# 1-Benzyl-3-(4-fluorophenyl)-1*H*-indole-2-carbonitrile (9b)

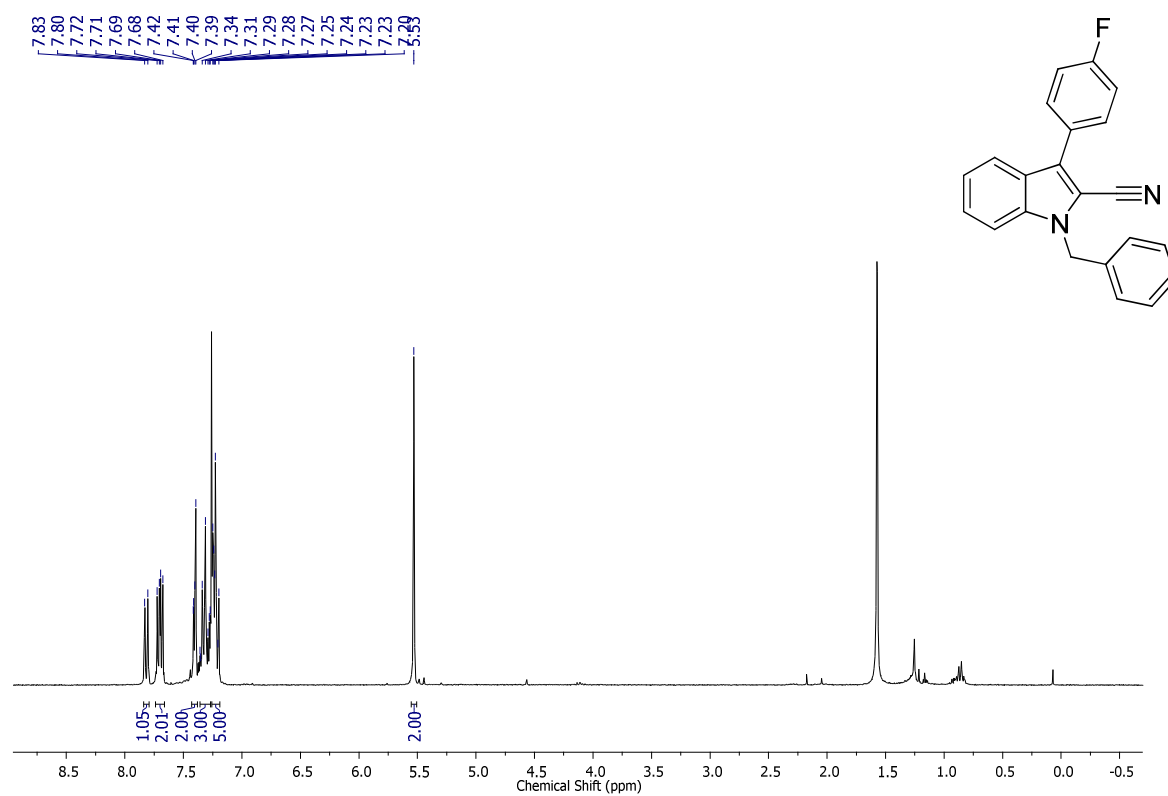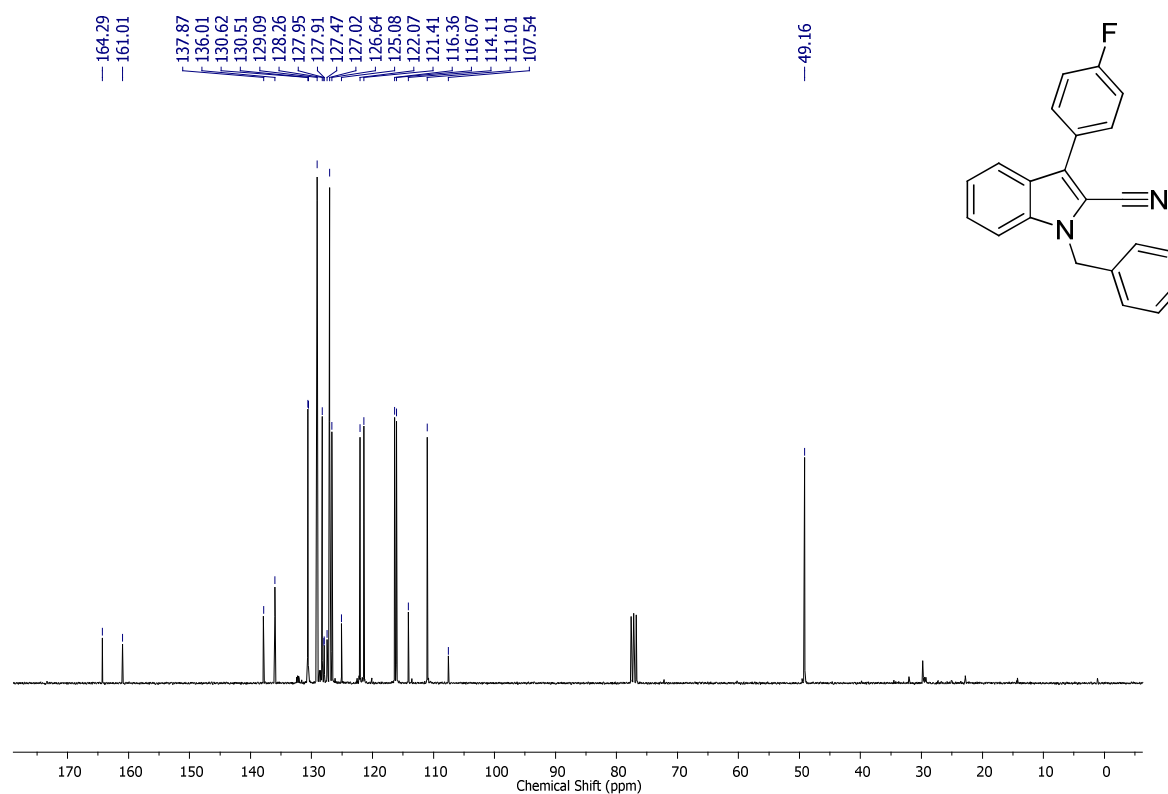

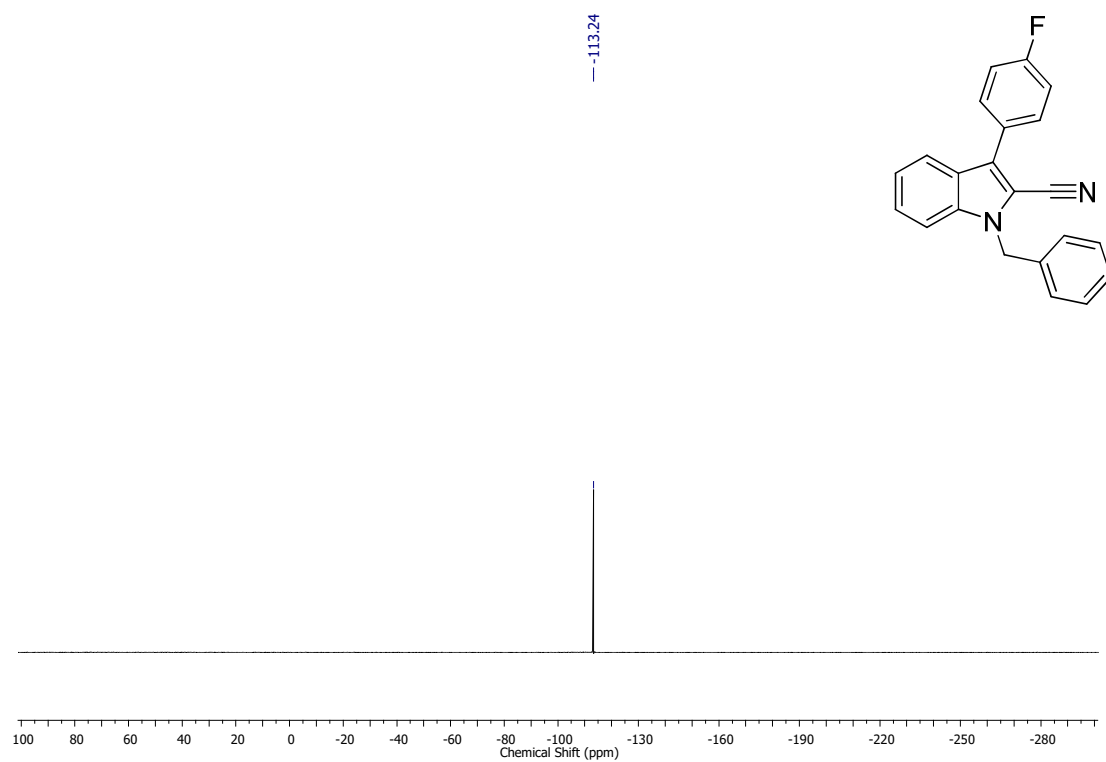

# 1-Benzyl-3-(4-*tert*-butylphenyl)-4-indole-2-carbonitrile (9c)

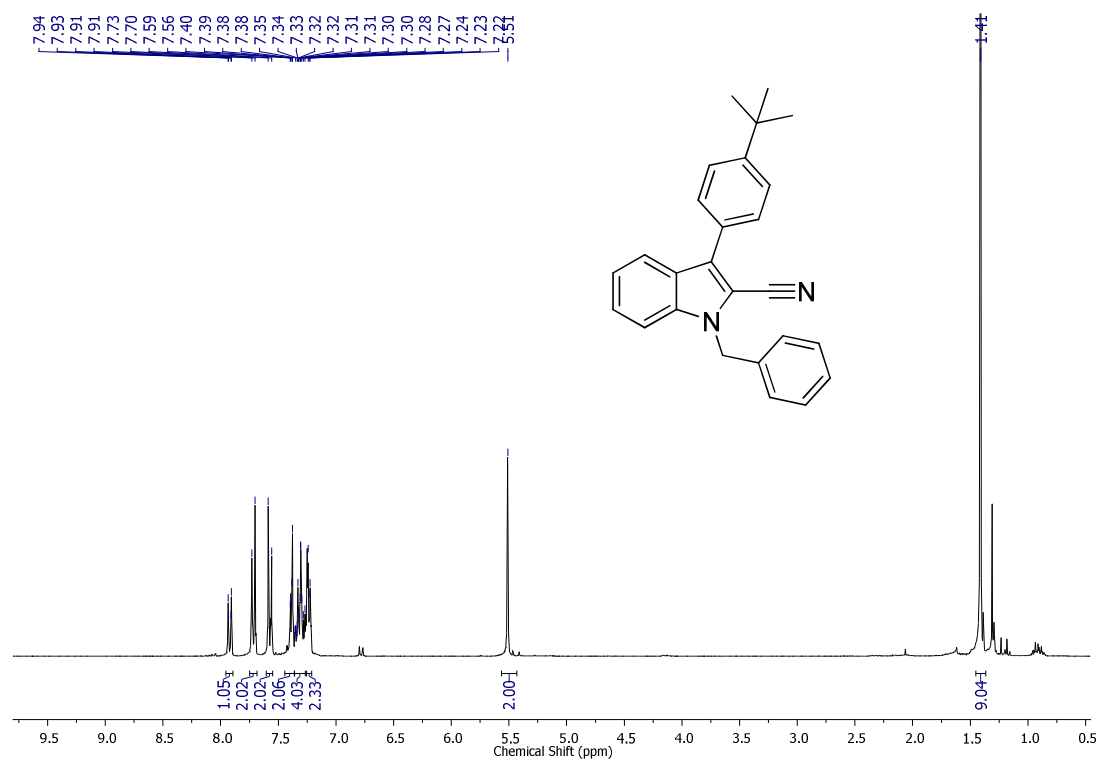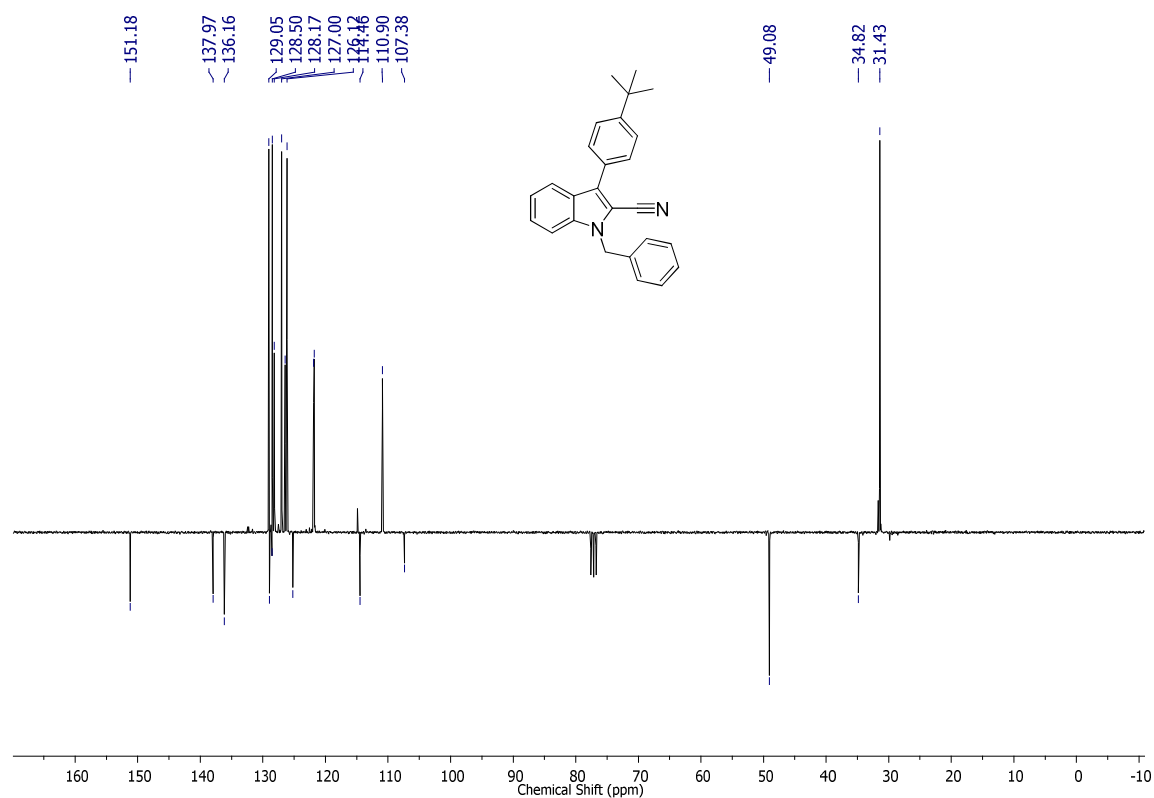



# 1-Benzyl-3-(4-(methylthio)phenyl)-1H-indole-2-carbonitrile (9d)

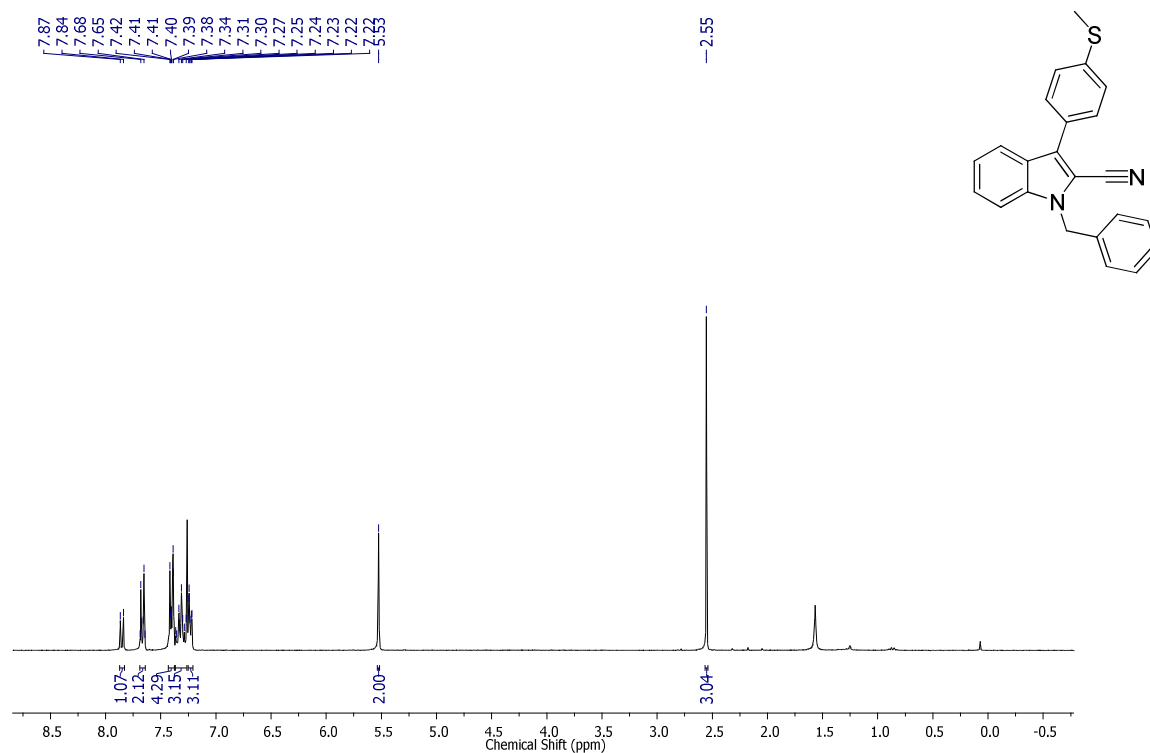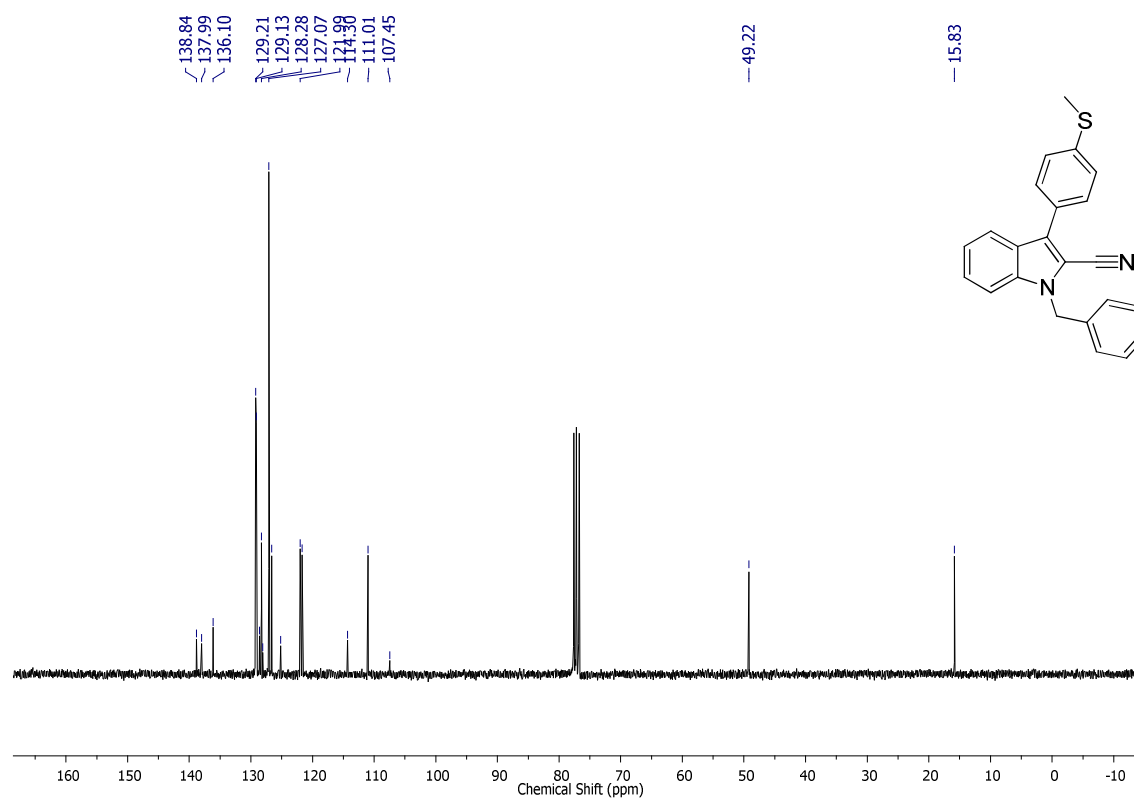

# 1-Benzyl-3-(4-(trifluoromethyl)phenyl)-1H-indole-2-carbonitrile (9e)

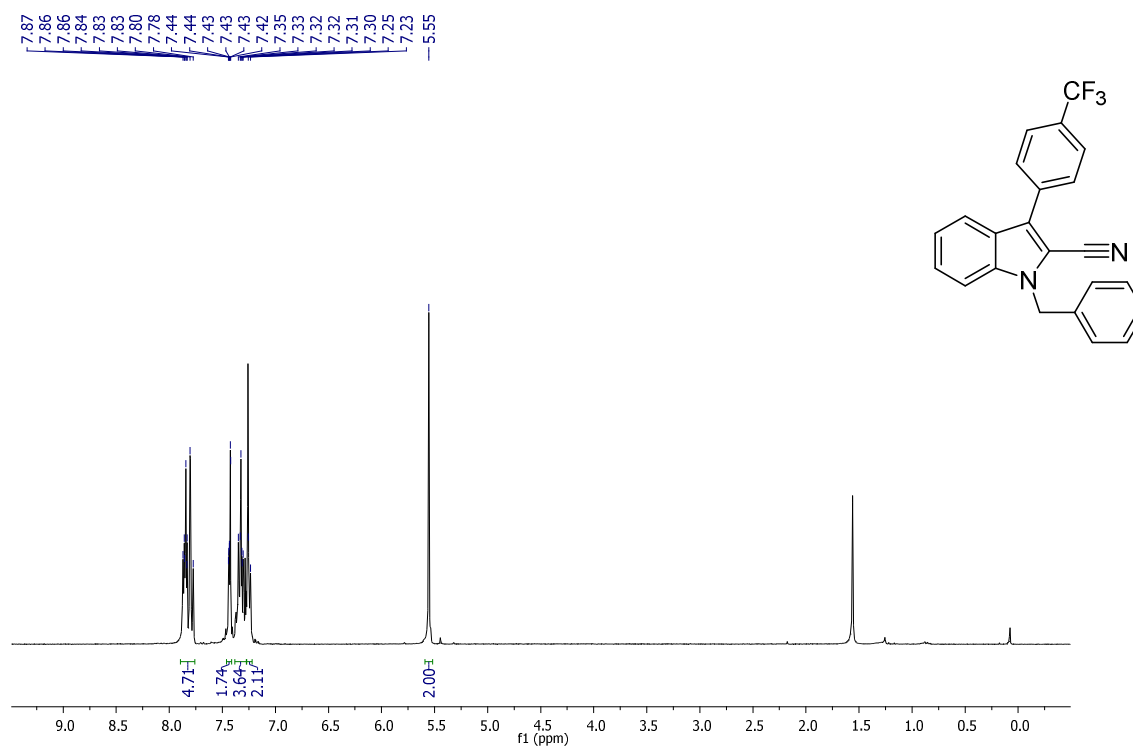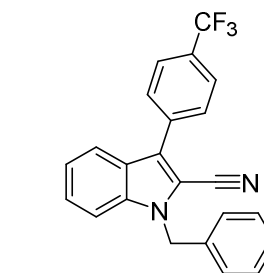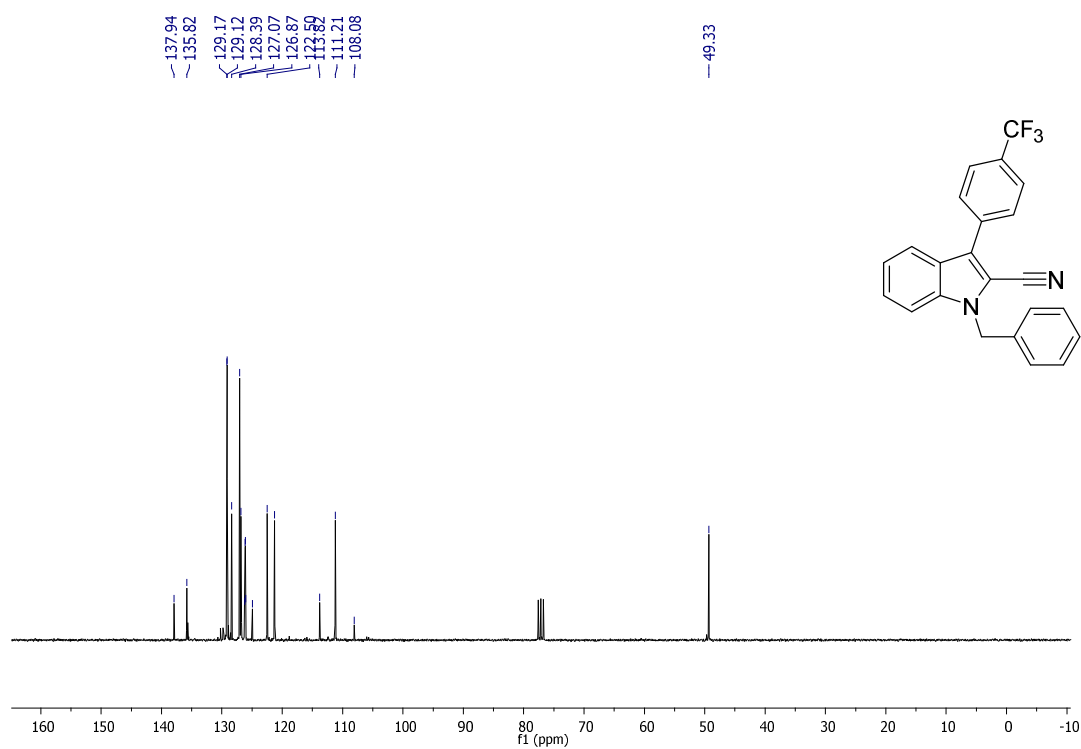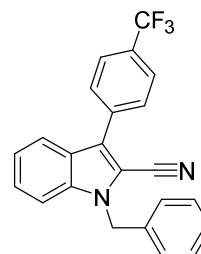

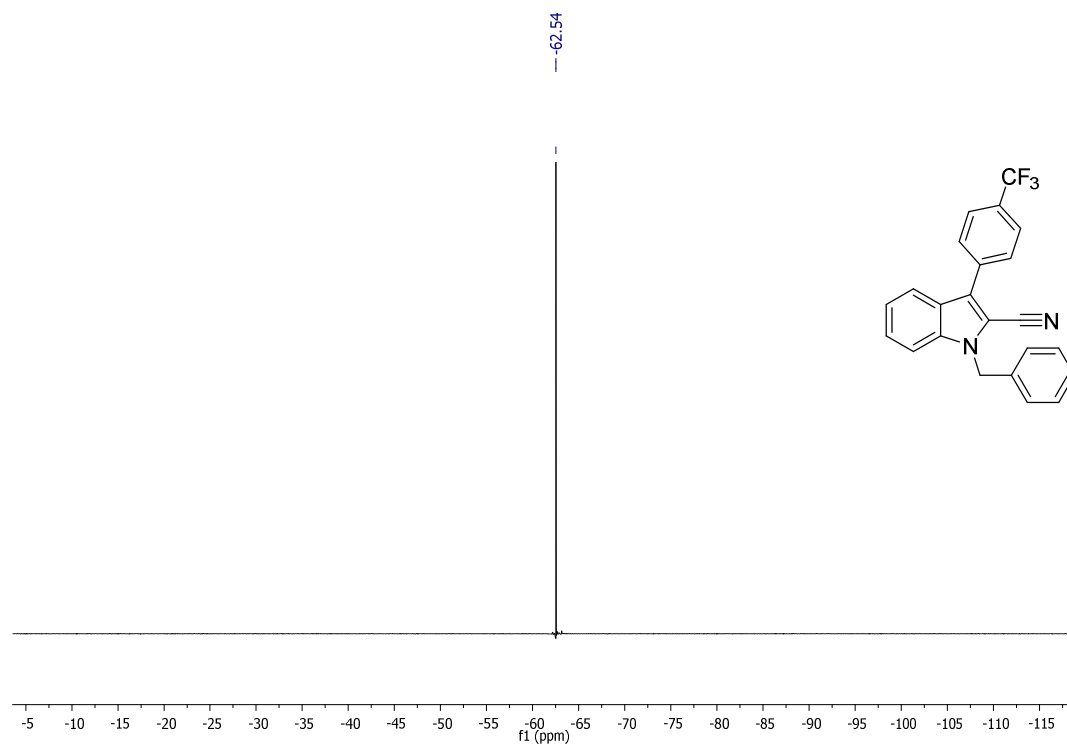

# 1-Benzyl-3-(2-methoxyphenyl)-1*H*-indole-2-carbonitrile (9f)

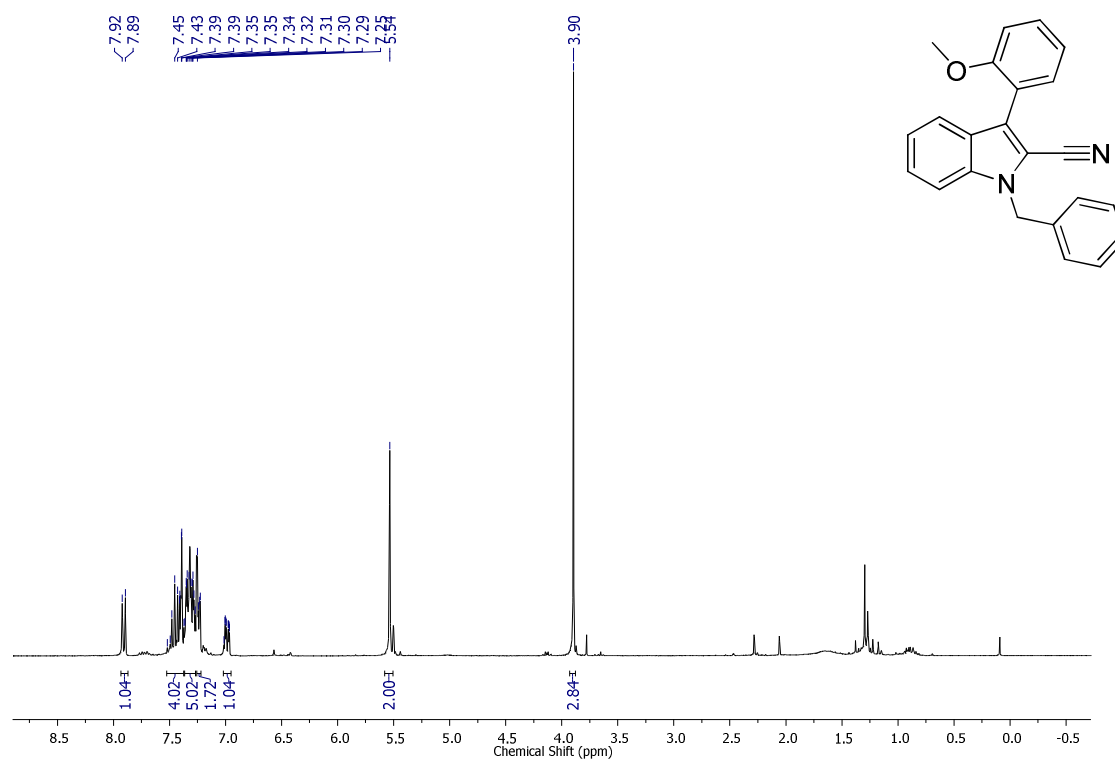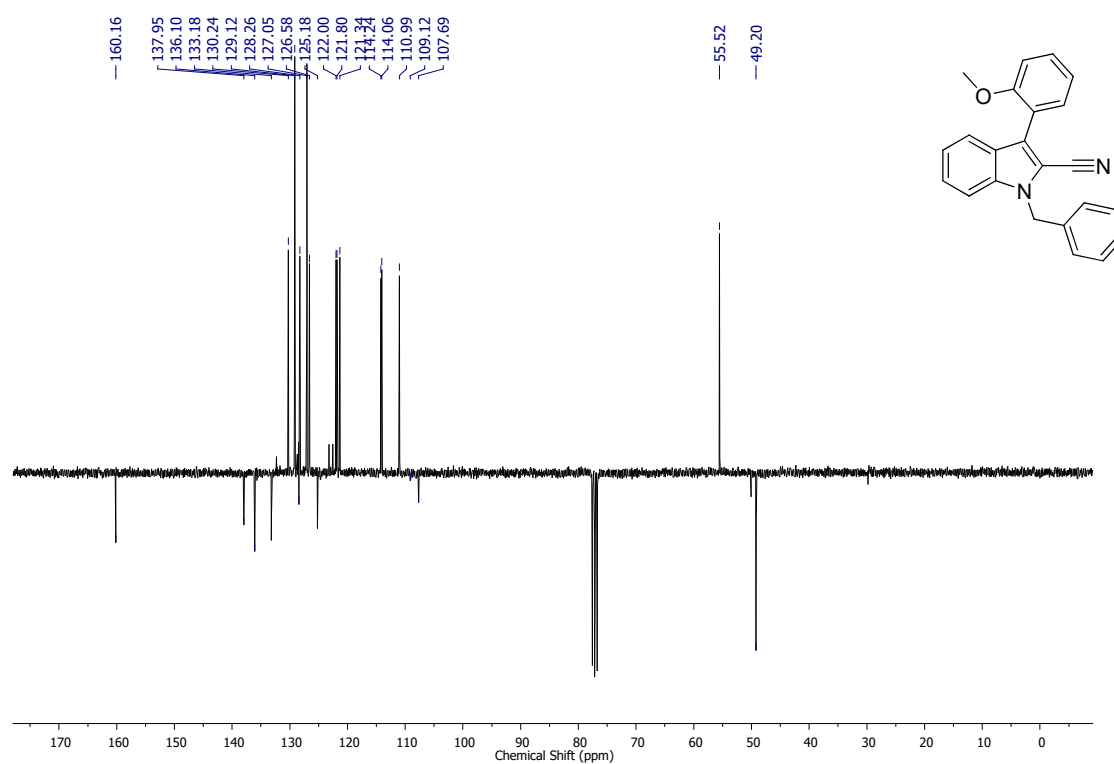

# 1-Benzyl-3-(2-fluorophenyl)-1*H*-indole-2-carbonitrile (9g)

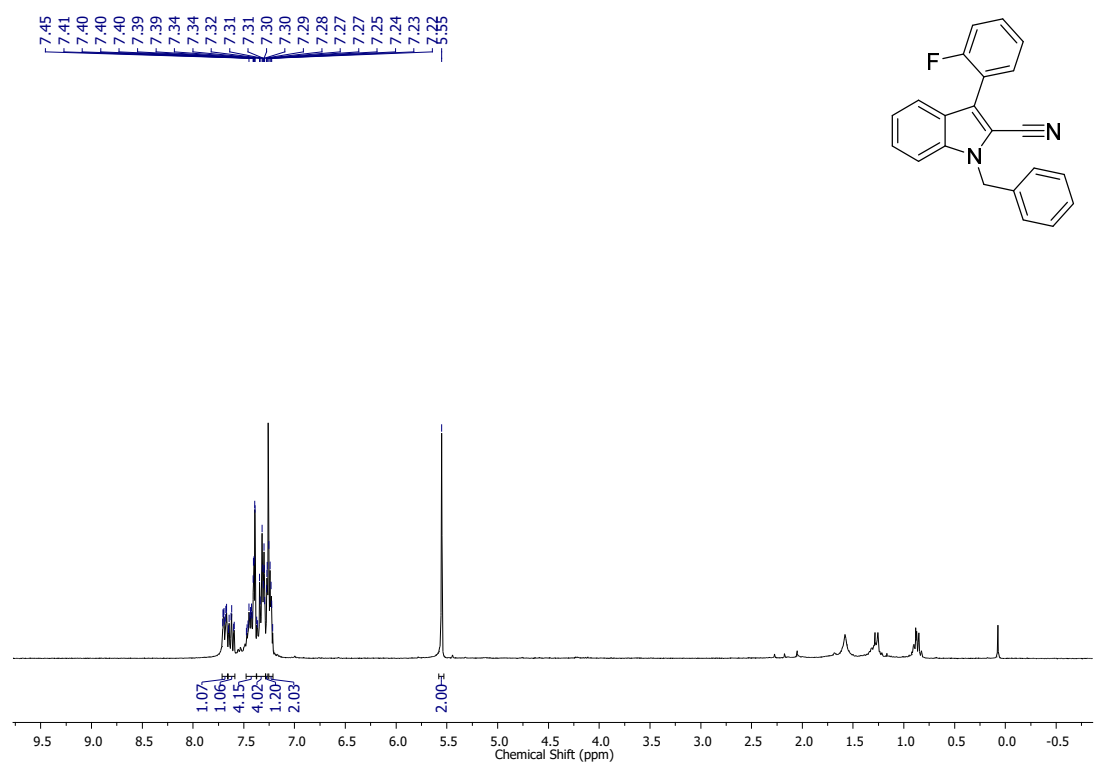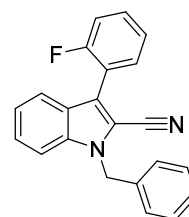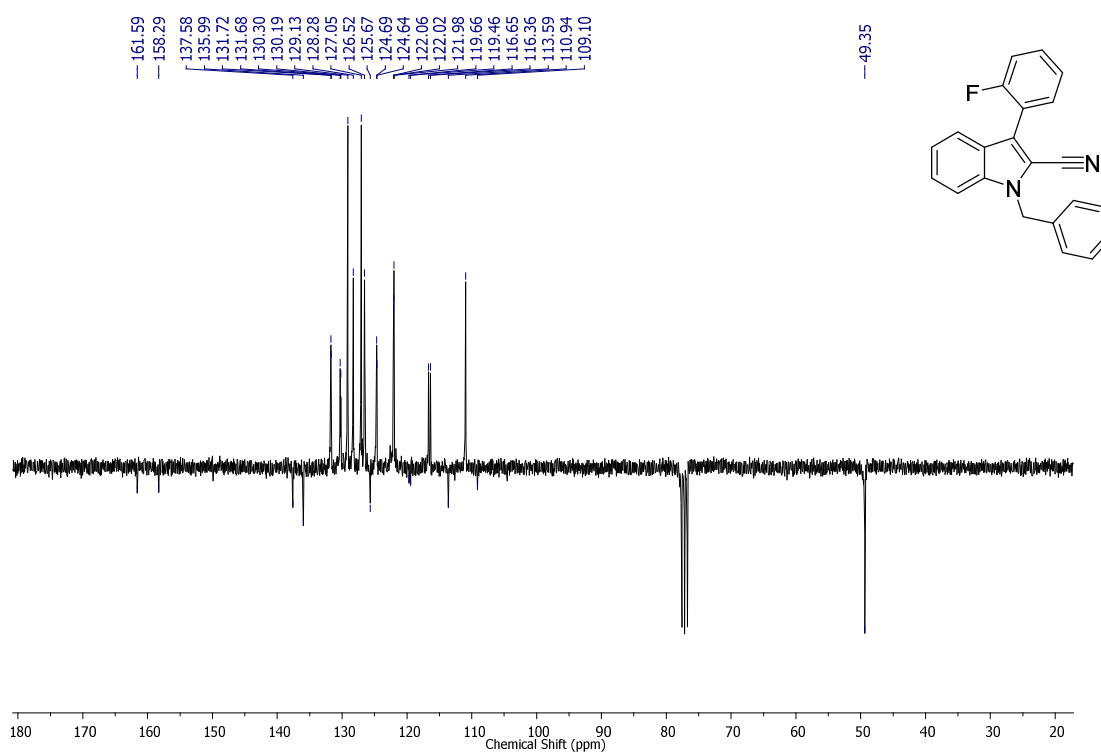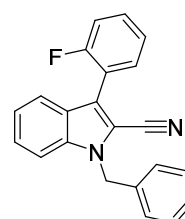

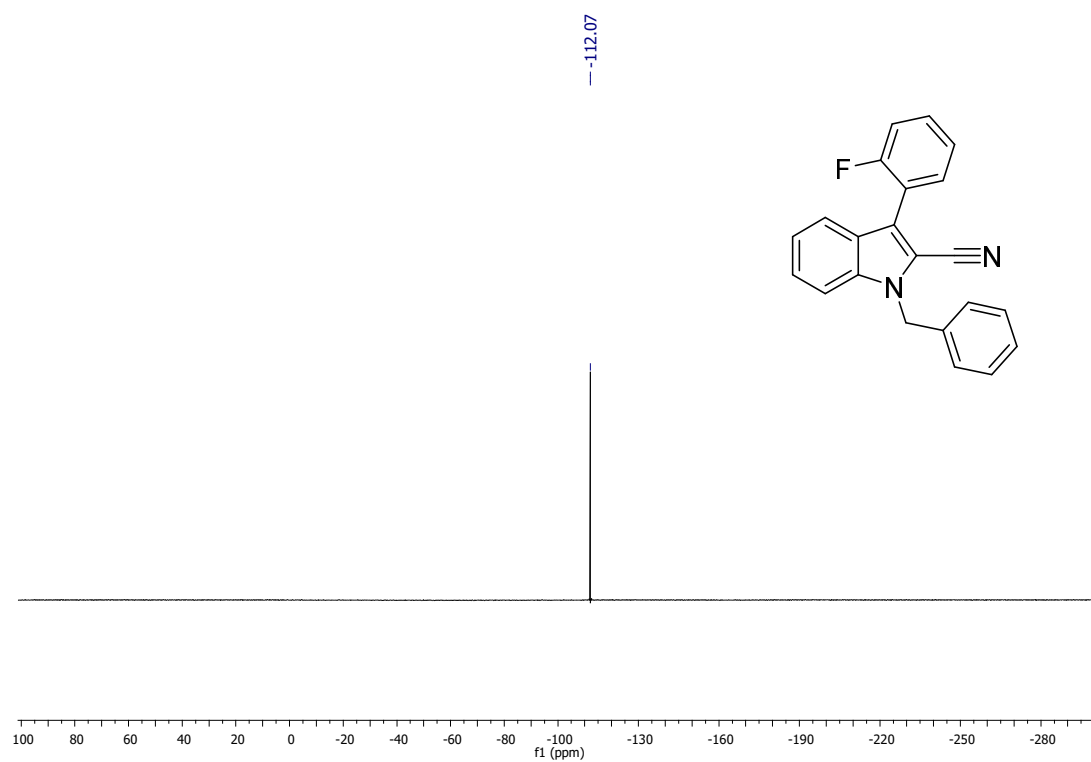

# 1-Benzyl-3-(*o*-tolyl)-1*H*-indole-2-carbonitrile (9h)

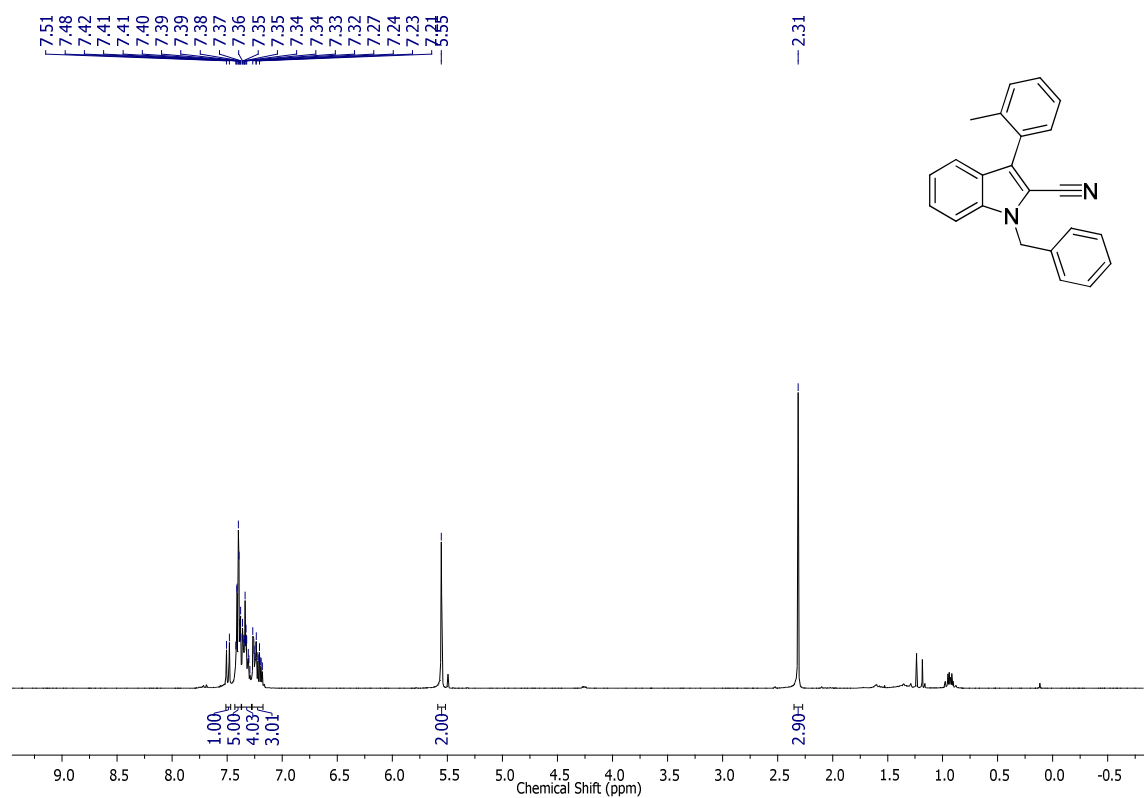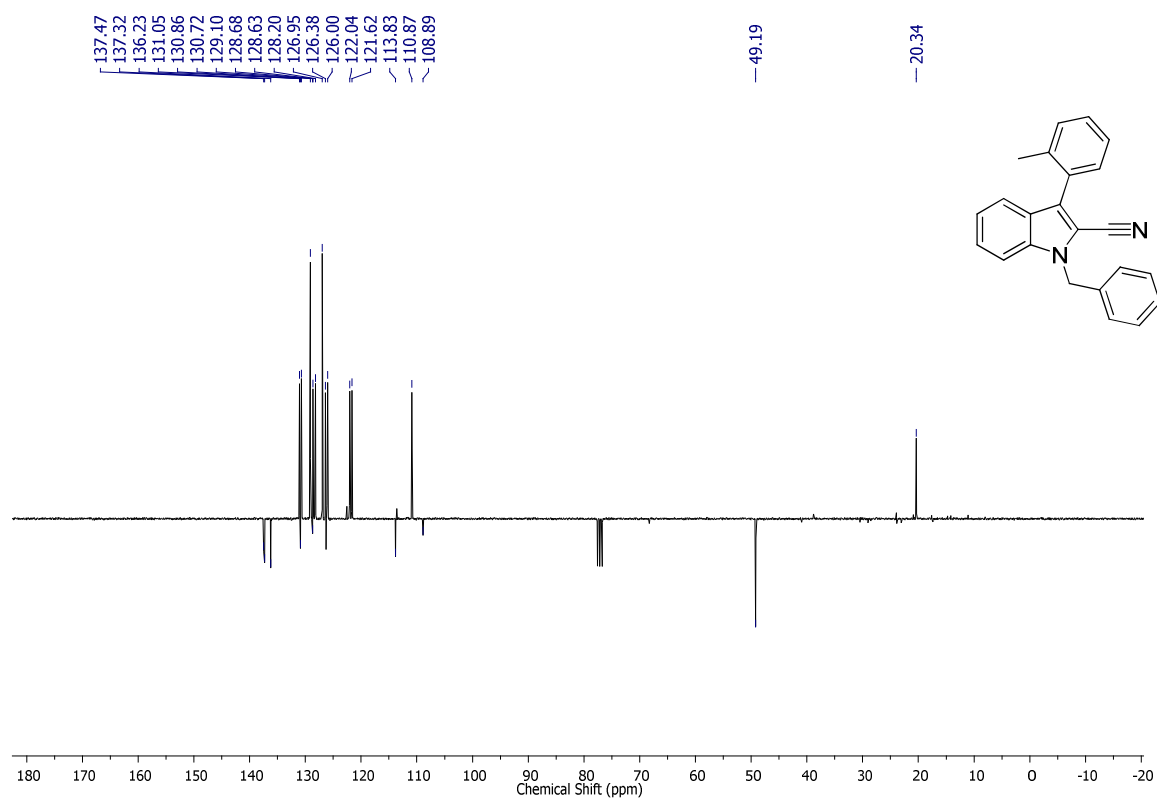

# 1-Benzyl-3-(3-methoxyphenyl)-1*H*-indole-2-carbonitrile (9i)

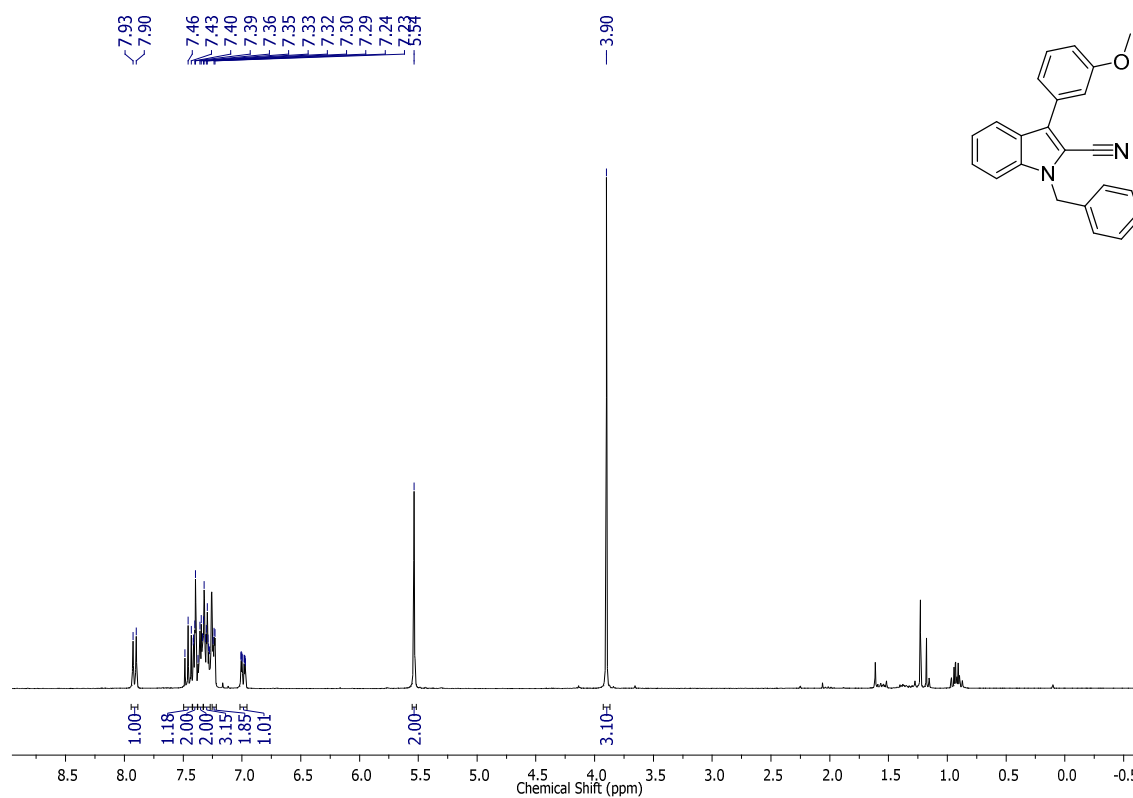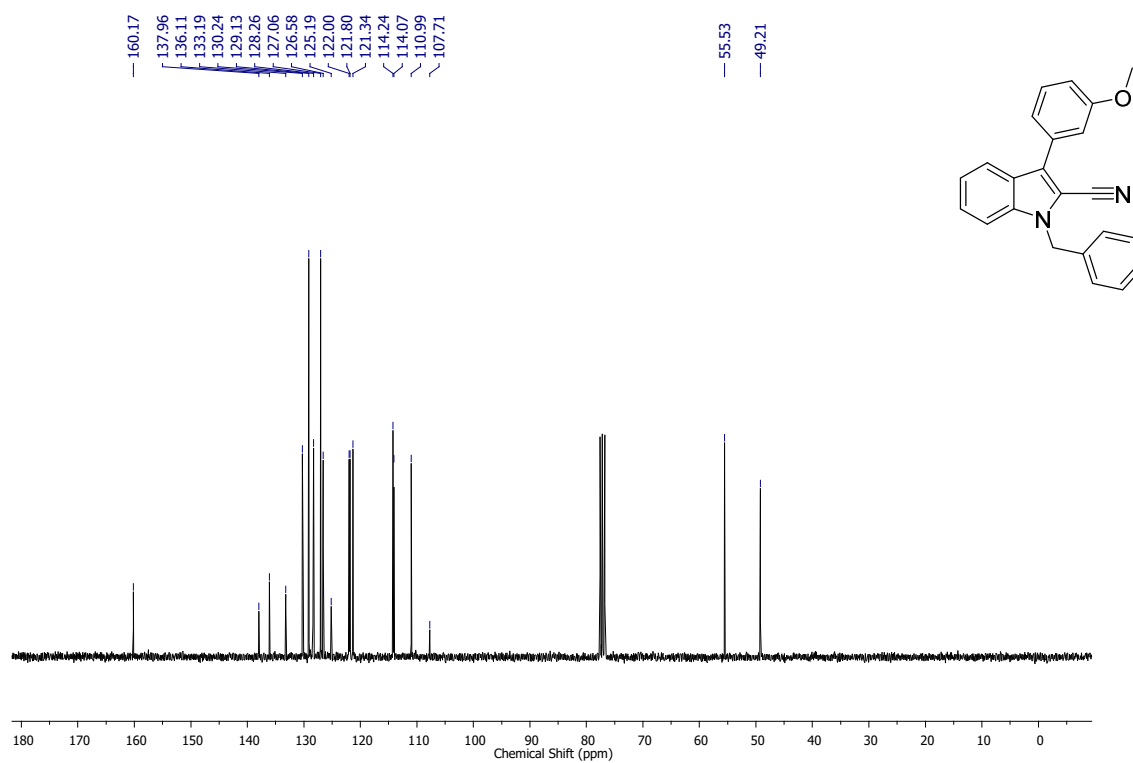



**1-Benzyl-3-(2,4-dimethoxyphenyl)-1*H*-indole-2-carbonitrile (9j)**

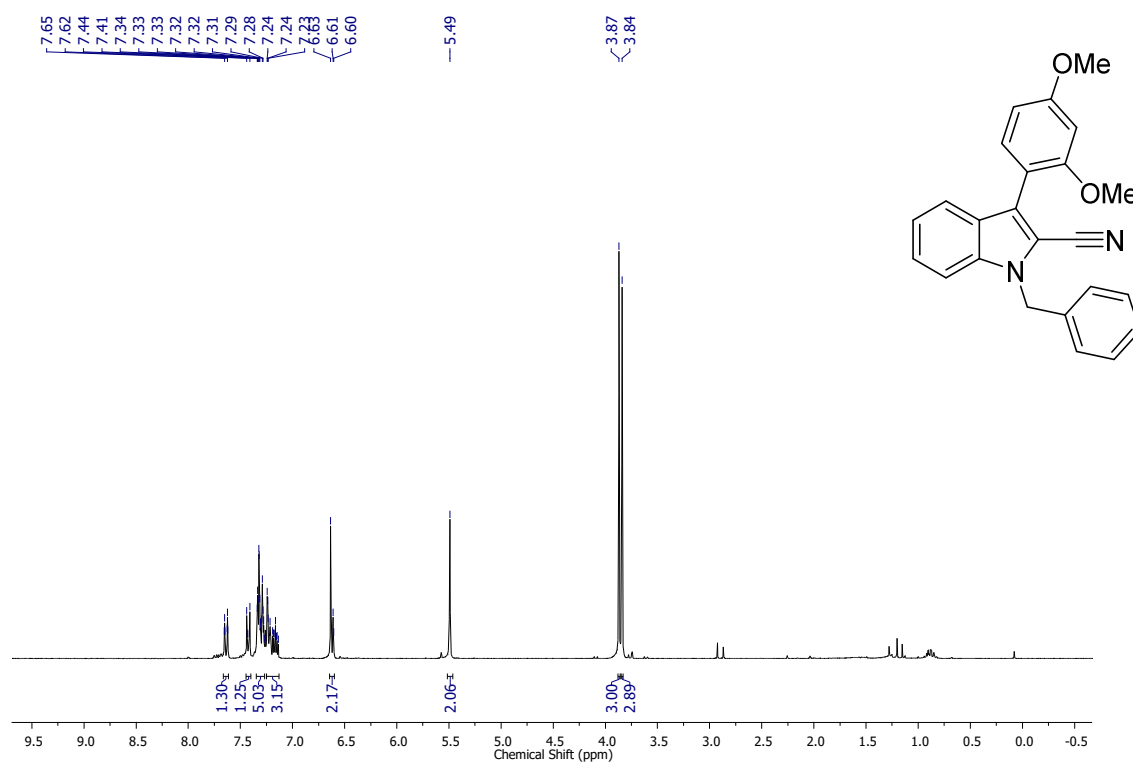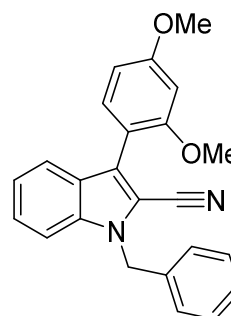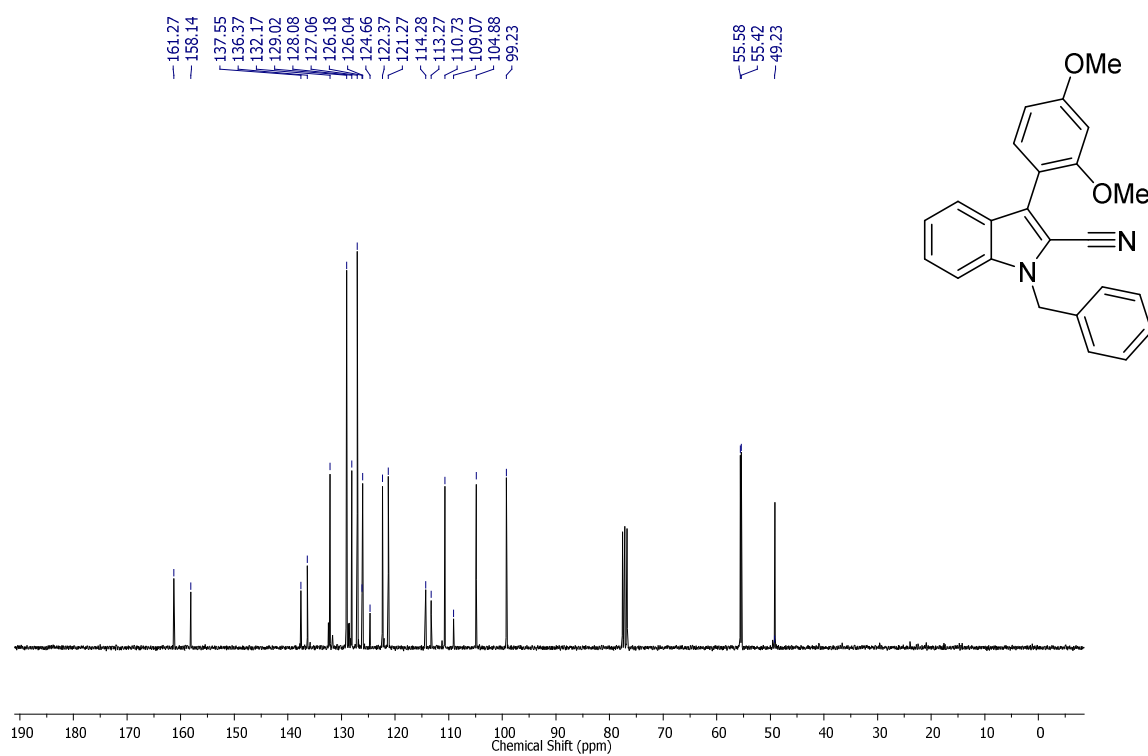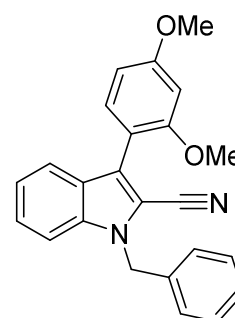

**1-Benzyl-3-(2,3-dihydrobenzo[*b*][1,4]dioxin-6-yl)-1*H*-indole-2-carbonitrile (9k)**

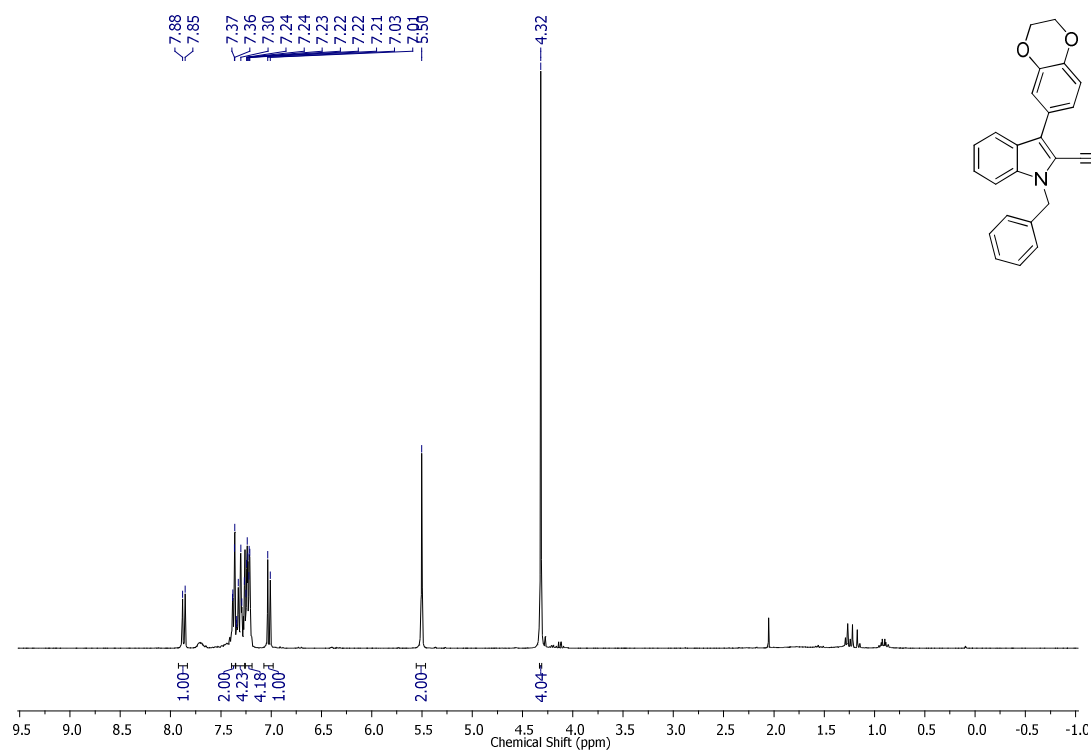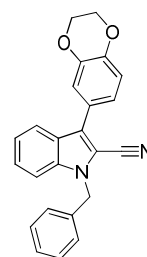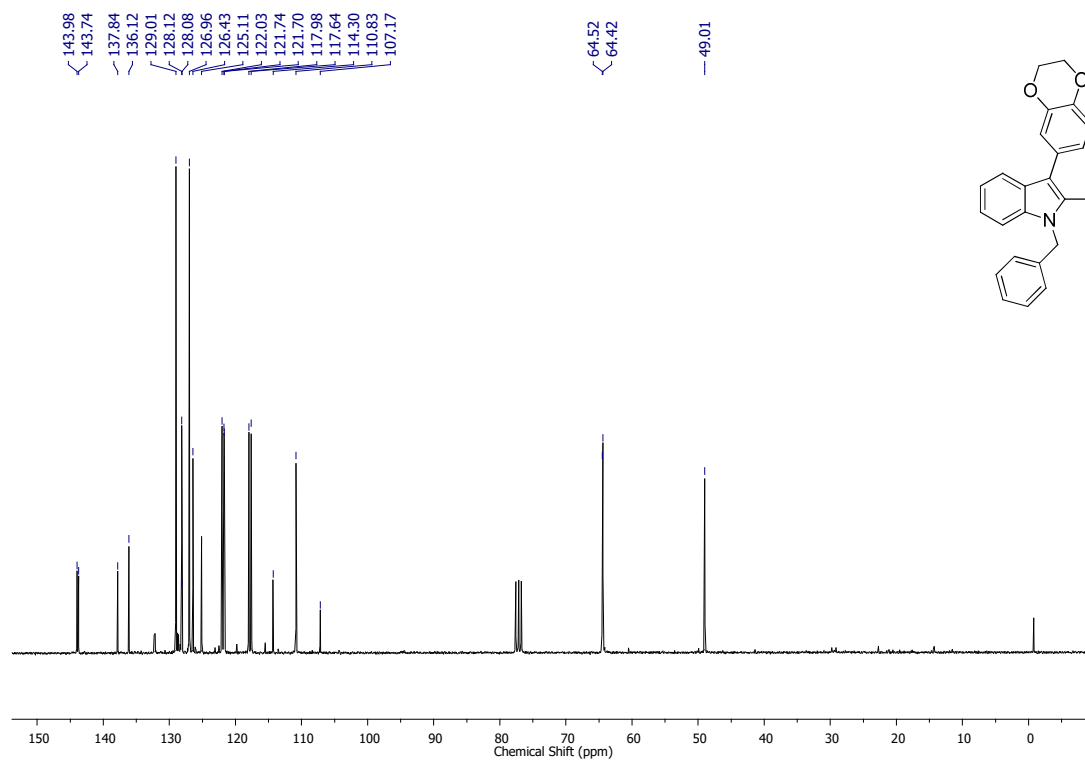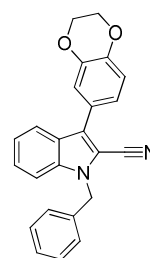

# 1-Benzyl-3-(6-methoxynaphthalen-2-yl)-1*H*-indole-2-carbonitrile (9l)

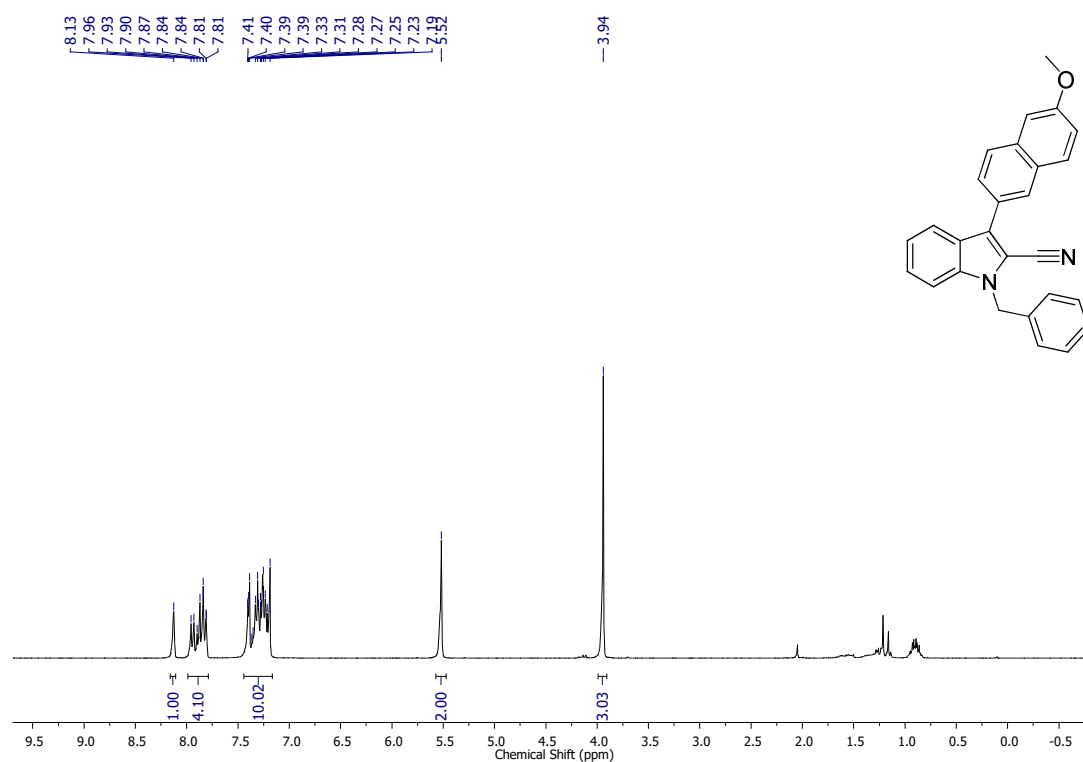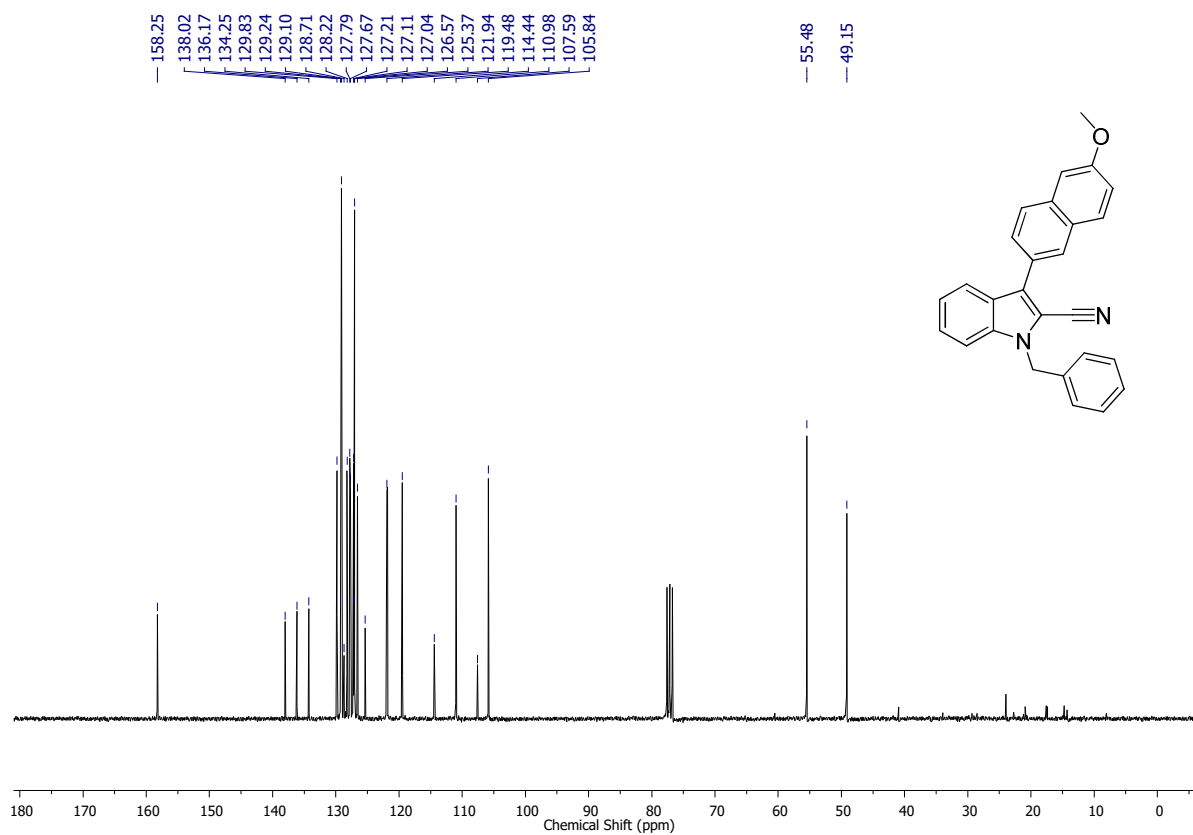

# 1-Benzyl-3-(2-methoxypyridin-3-yl)-1H-indole-2-carbonitrile (9m)

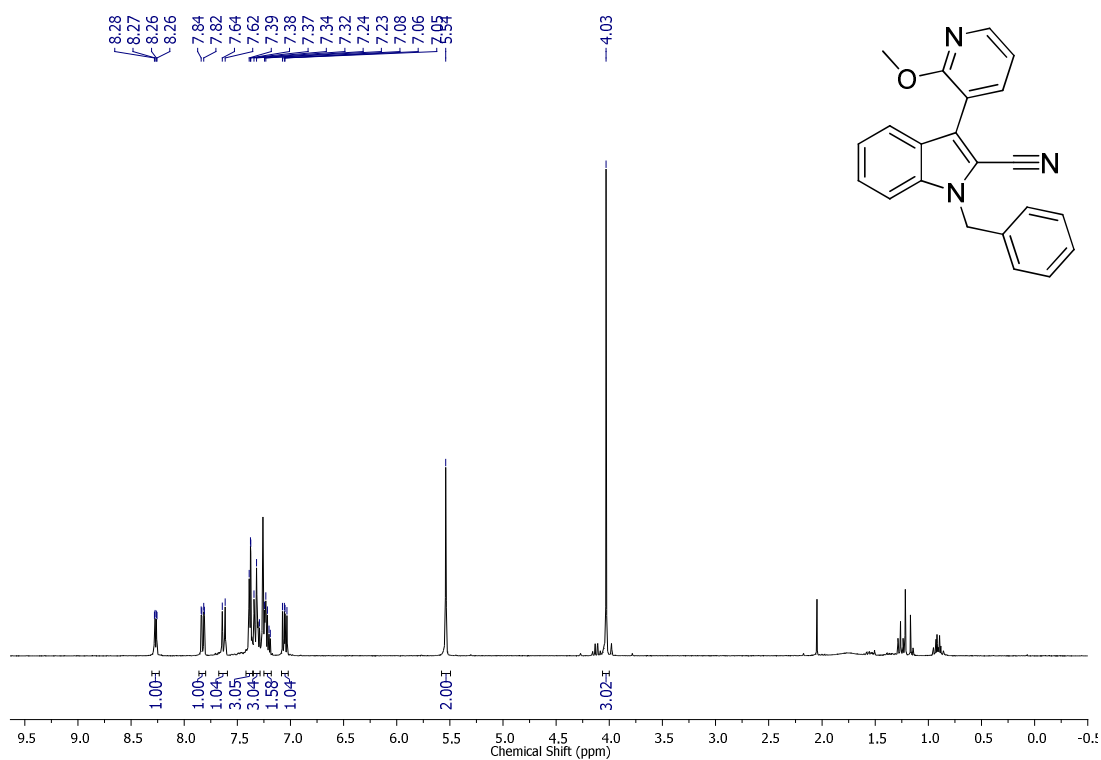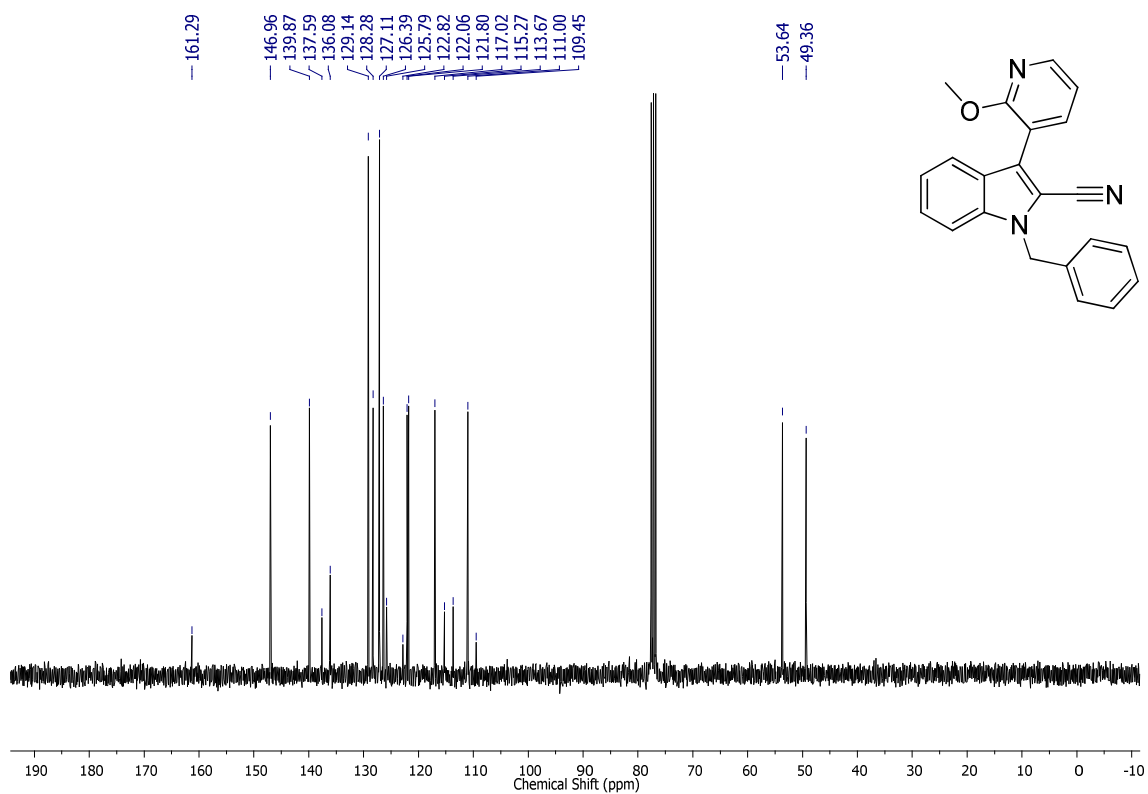

# 1-Benzyl-5-methoxy-3-(4-methoxyphenyl)-1*H*-indole-2-carbonitrile (9n)

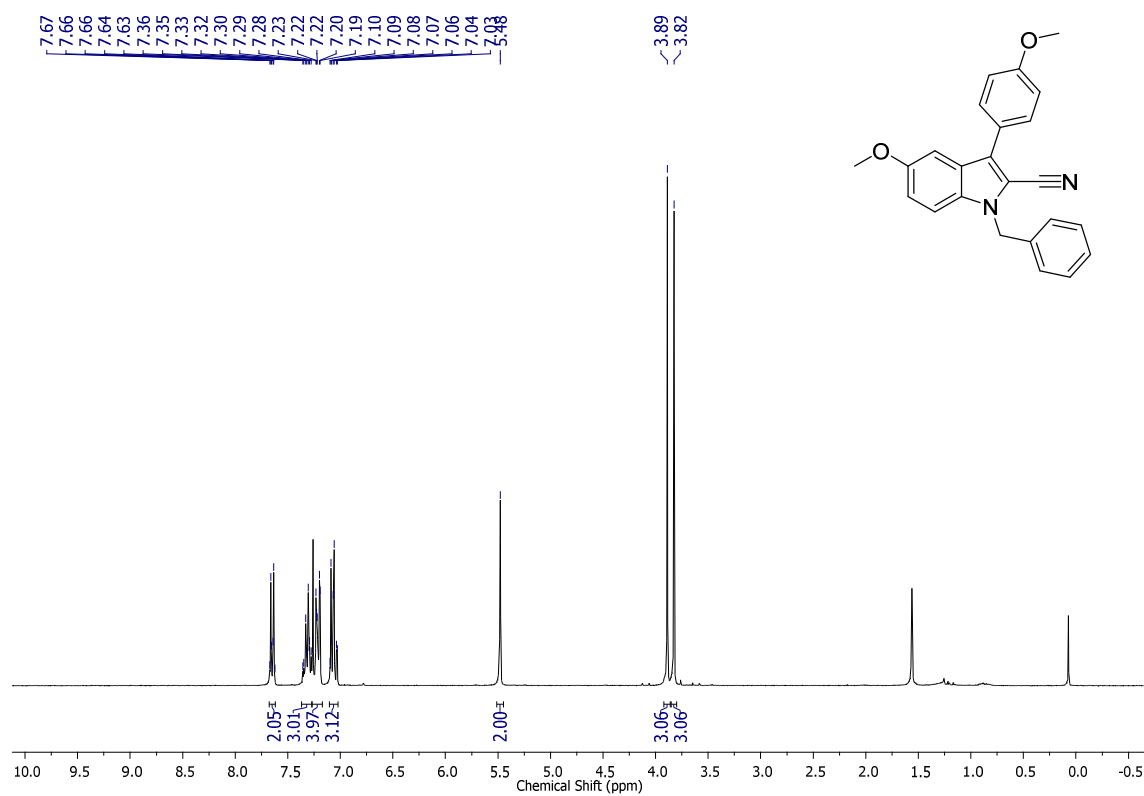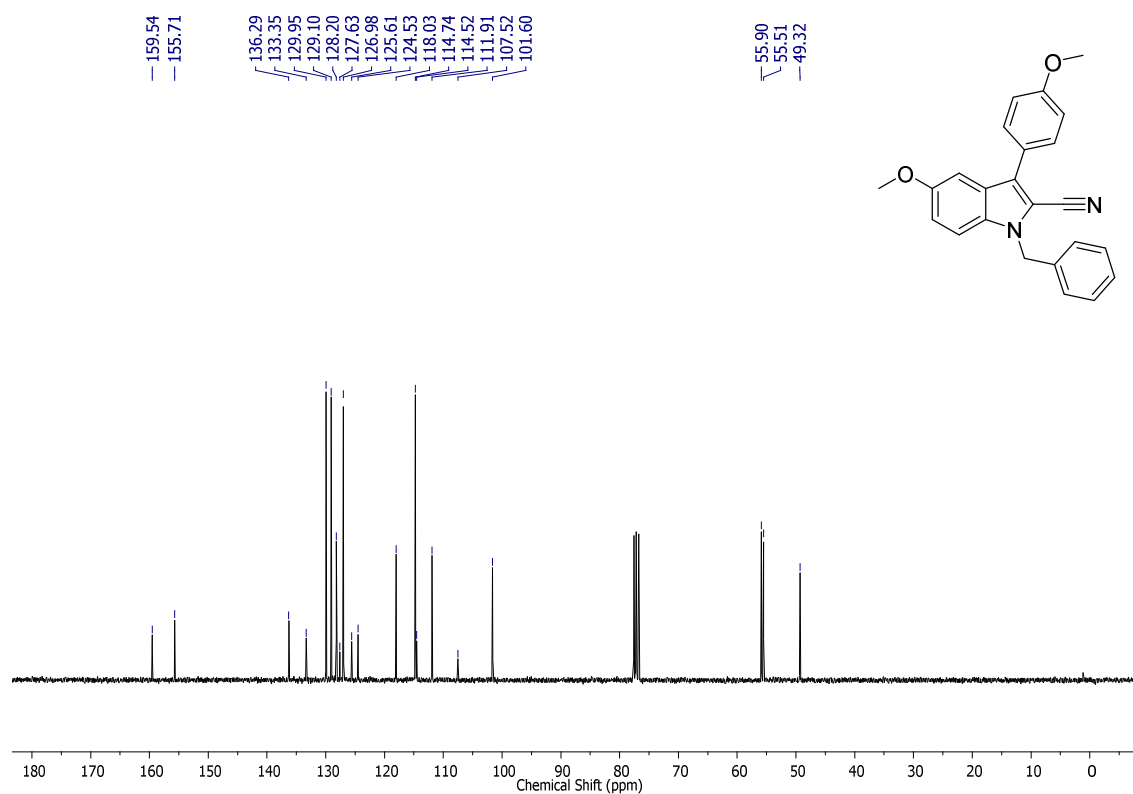

# 1-Benzyl-6-methoxy-3-(3-methoxyphenyl)-1*H*-indole-2-carbonitrile (9o)

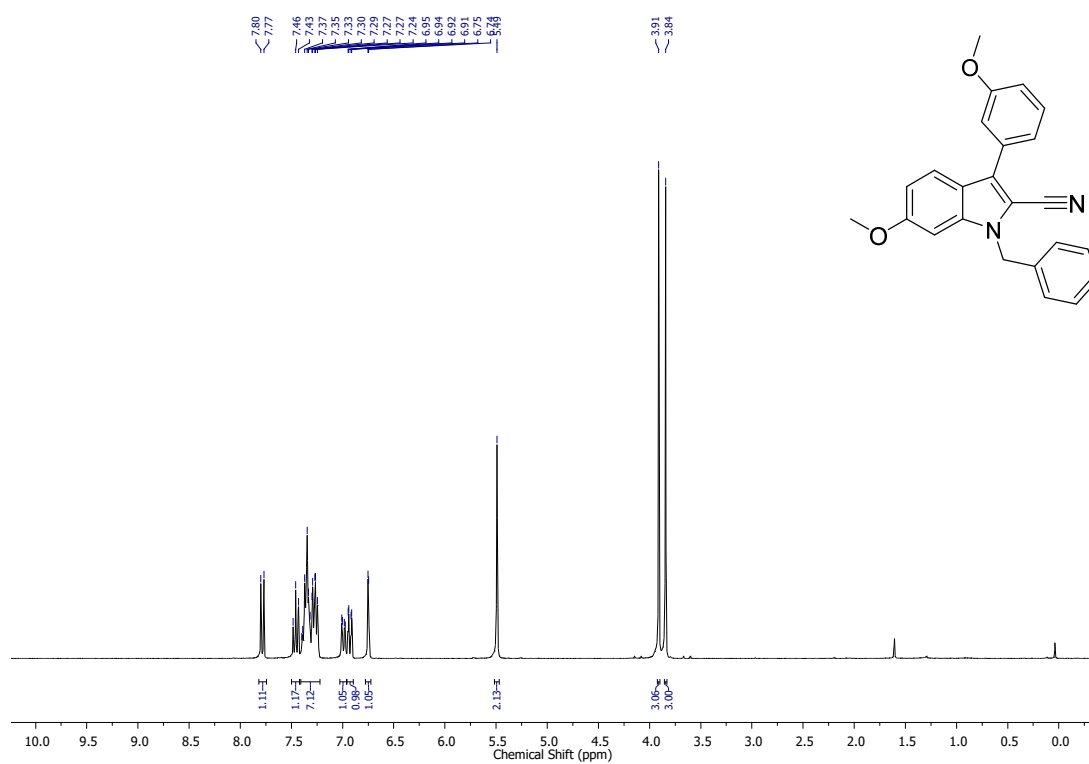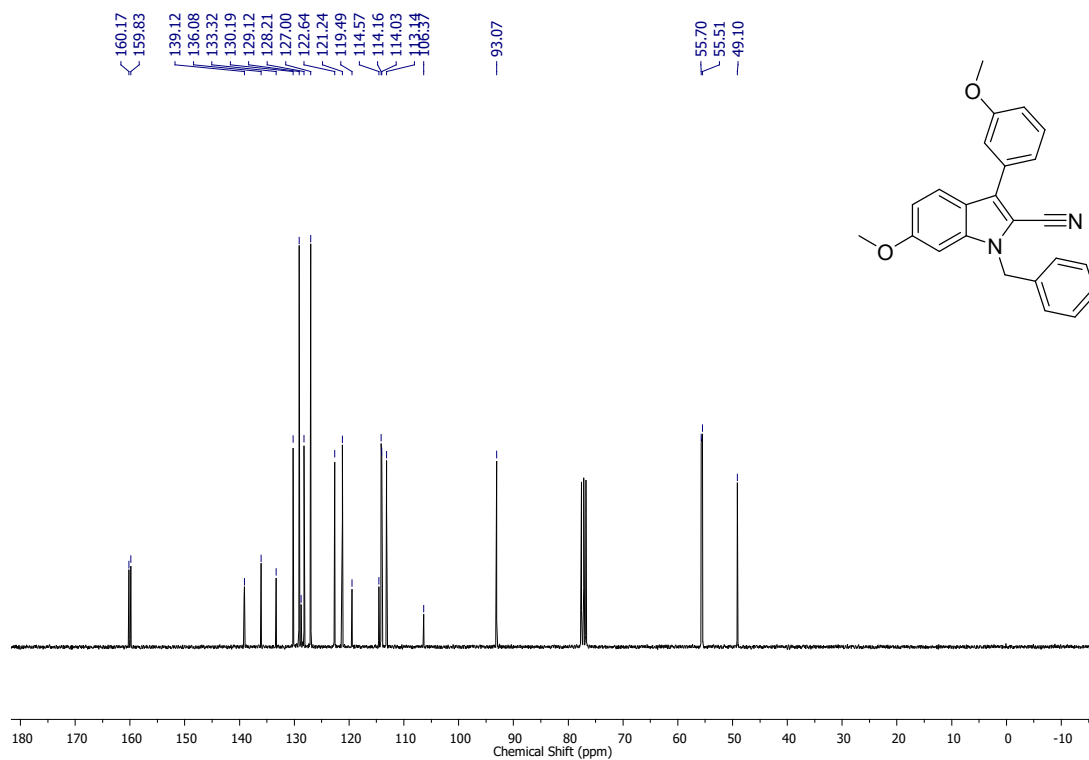

**1-Benzyl-5-fluoro-3-(3-methoxyphenyl)-1*H*-indole-2-carbonitrile (9p)**

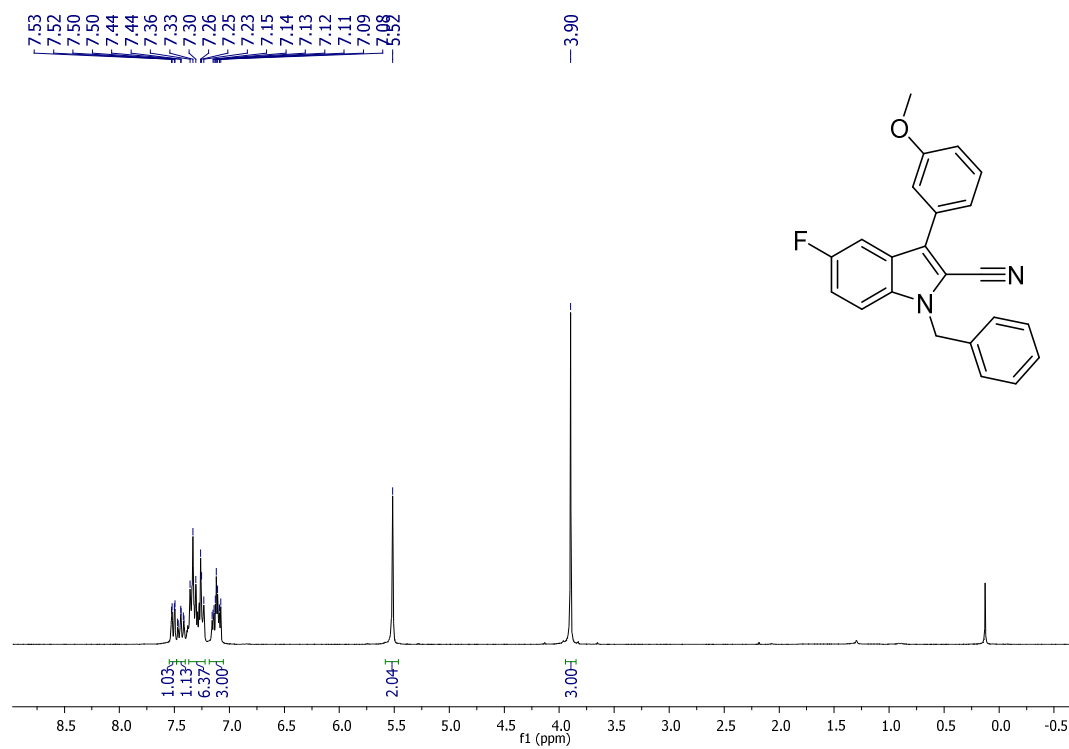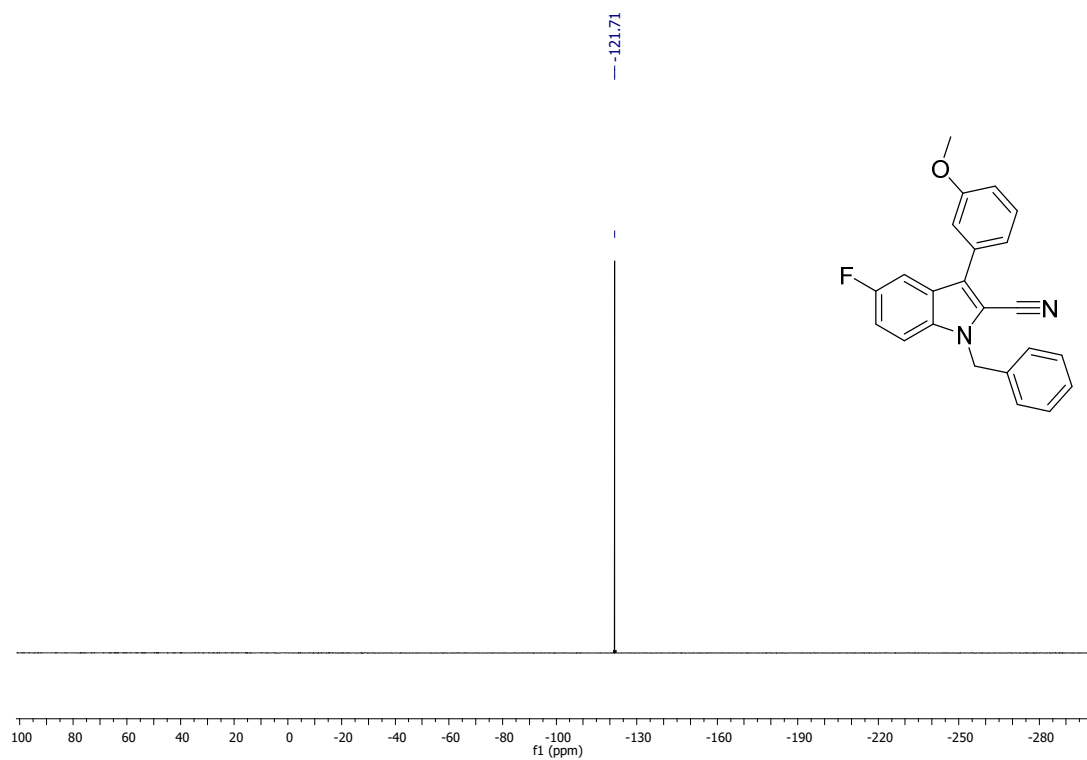

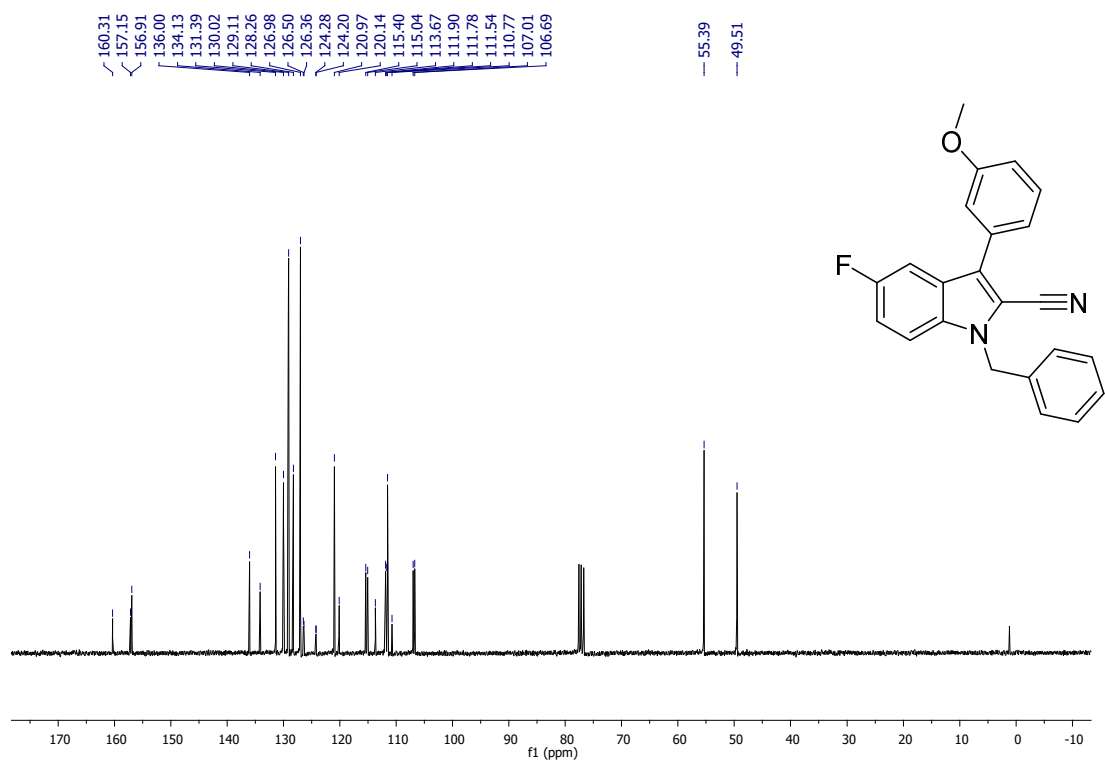



# **Methyl (*E*)-3-(1-benzyl-2-cyano-1*H*-indol-3-yl)acrylate (10a)**

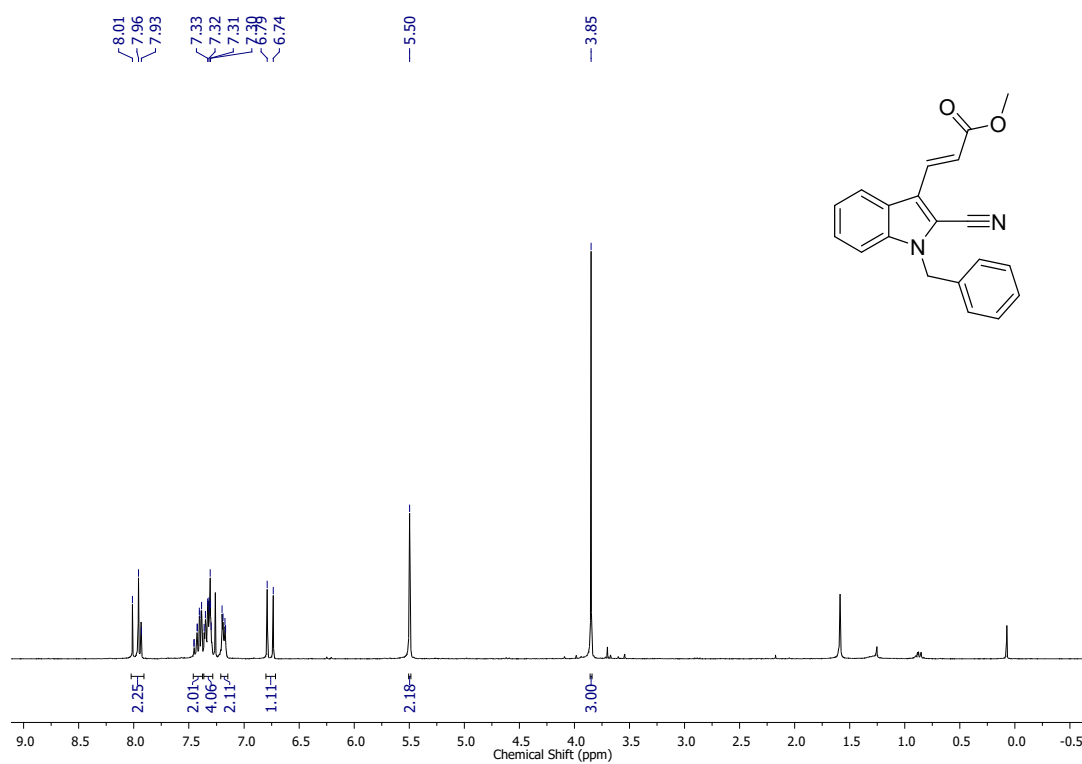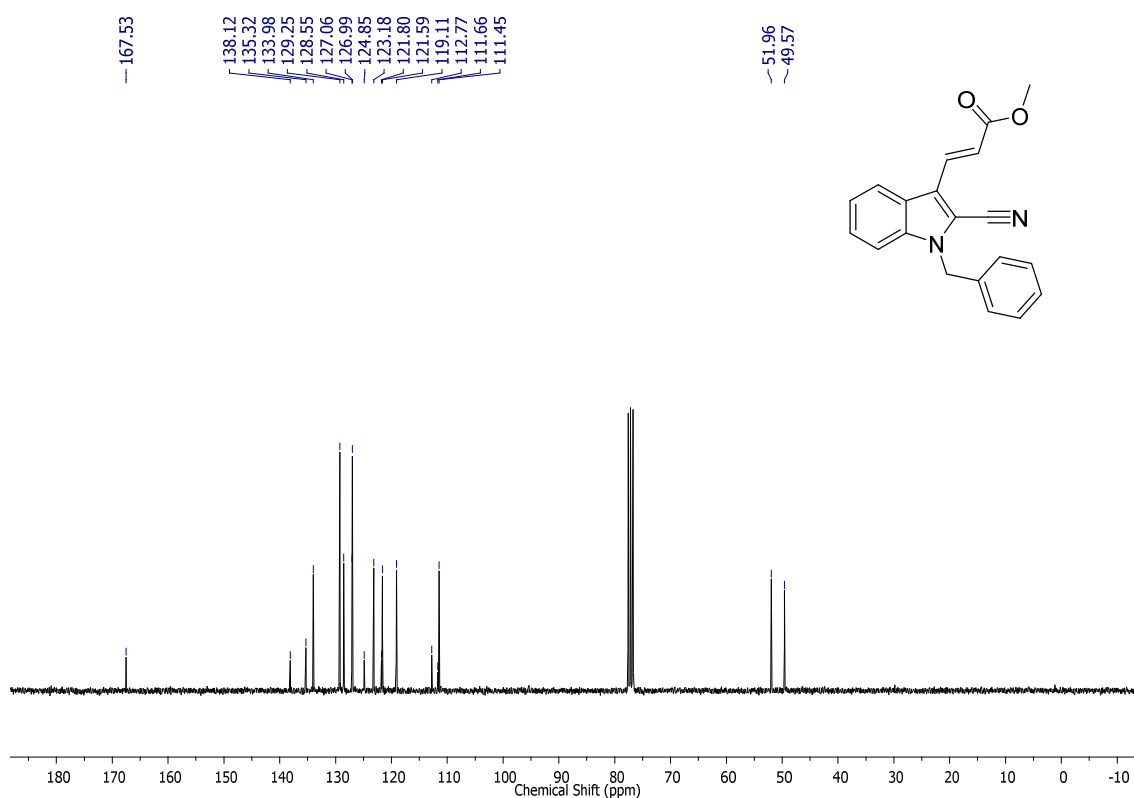

**(E)-1-Benzyl-3-styryl-1*H*-indole-2-carbonitrile (10b)**

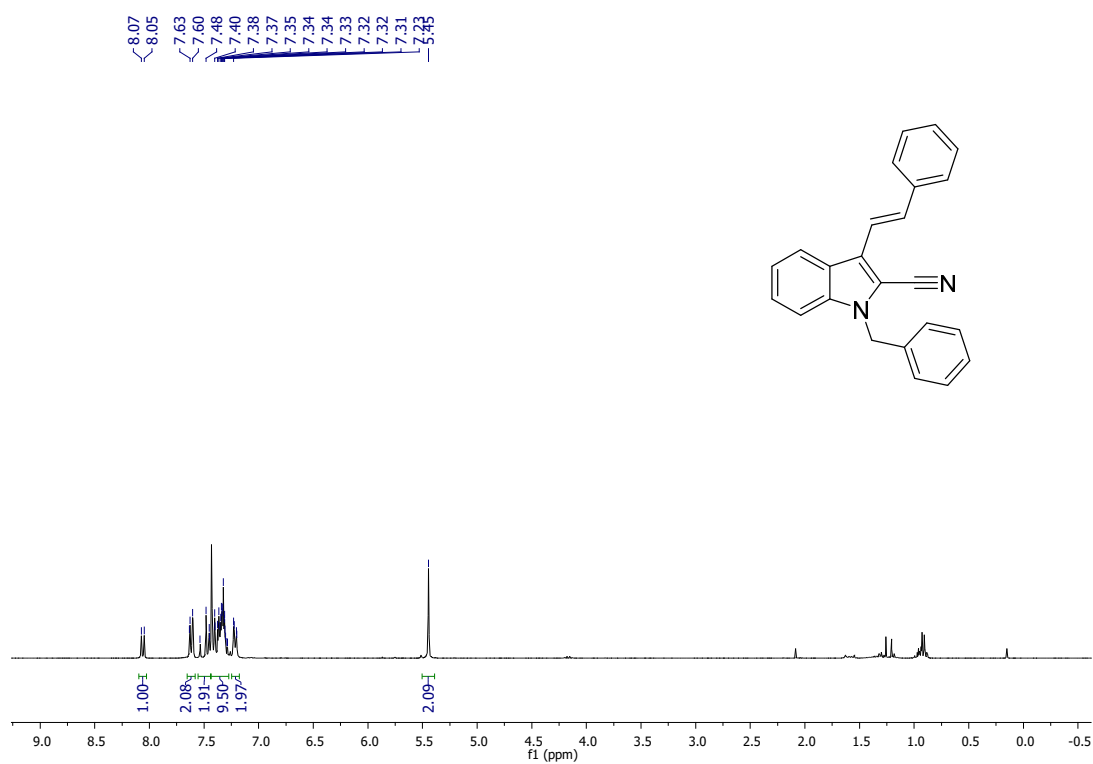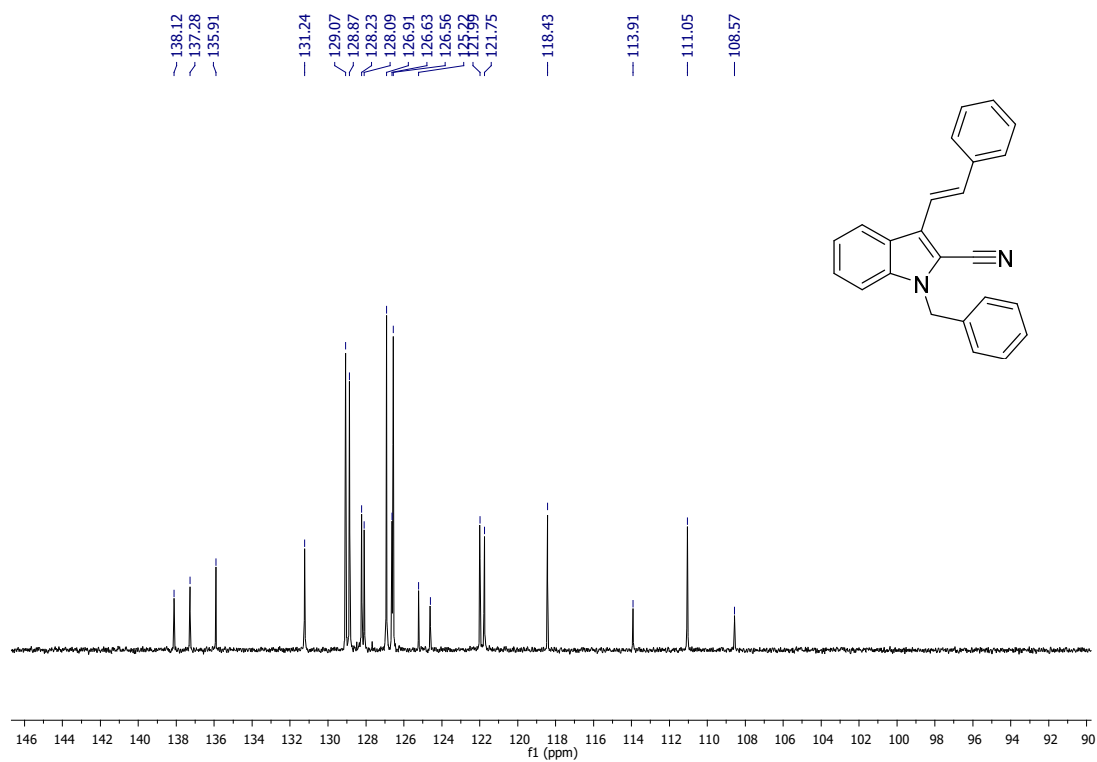

**(E)-1-Benzyl-3-(3-cyanoprop-1-en-1-yl)-1H-indole-2-carbonitrile (10c)**

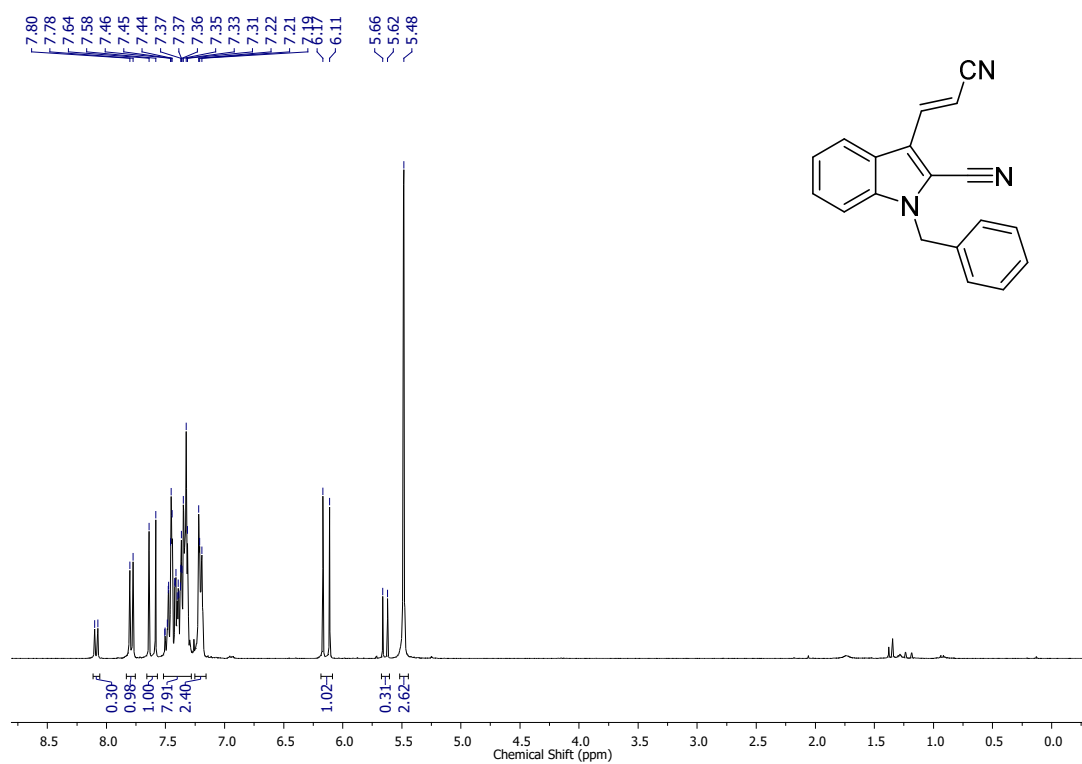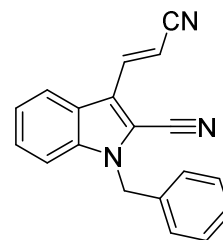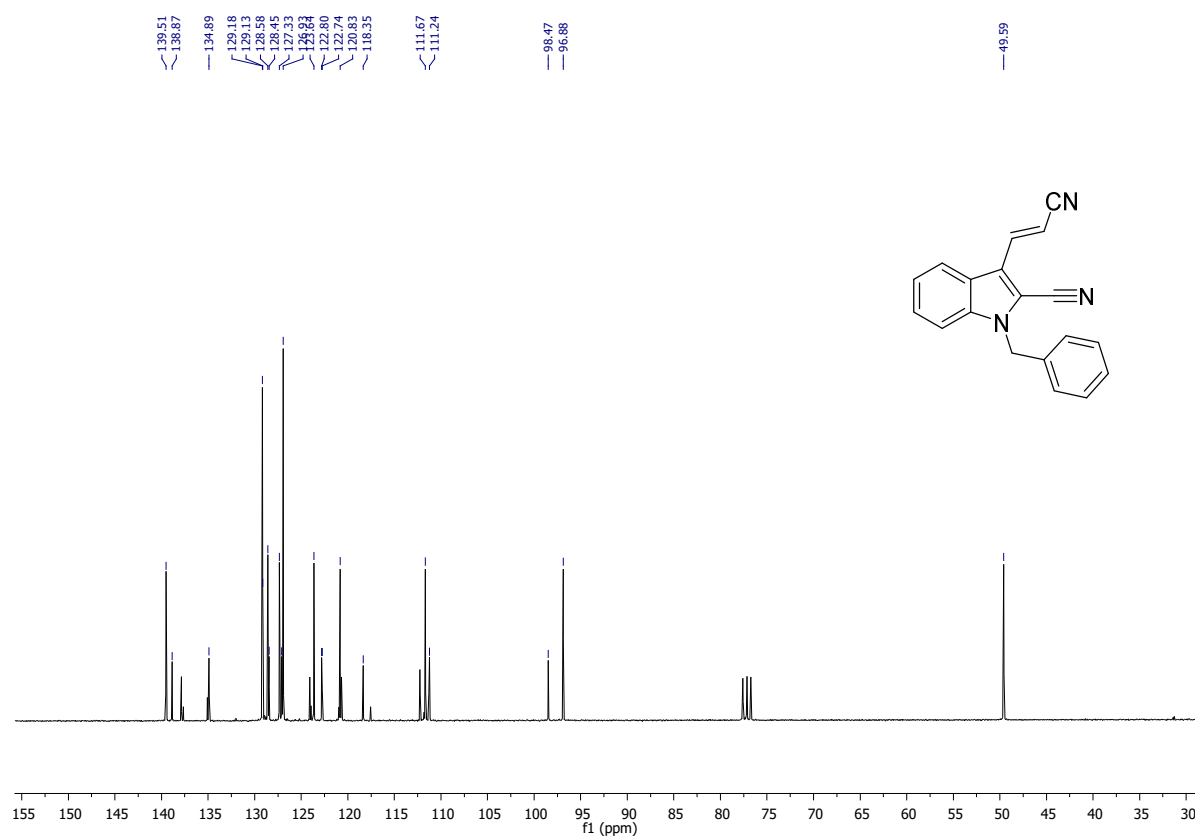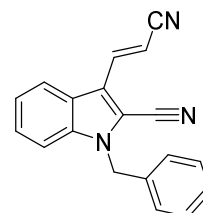

**(E)-Methyl-3-(1-benzyl-2-cyano-5-methoxy-1H-indol-3-yl)acrylate (10d)**

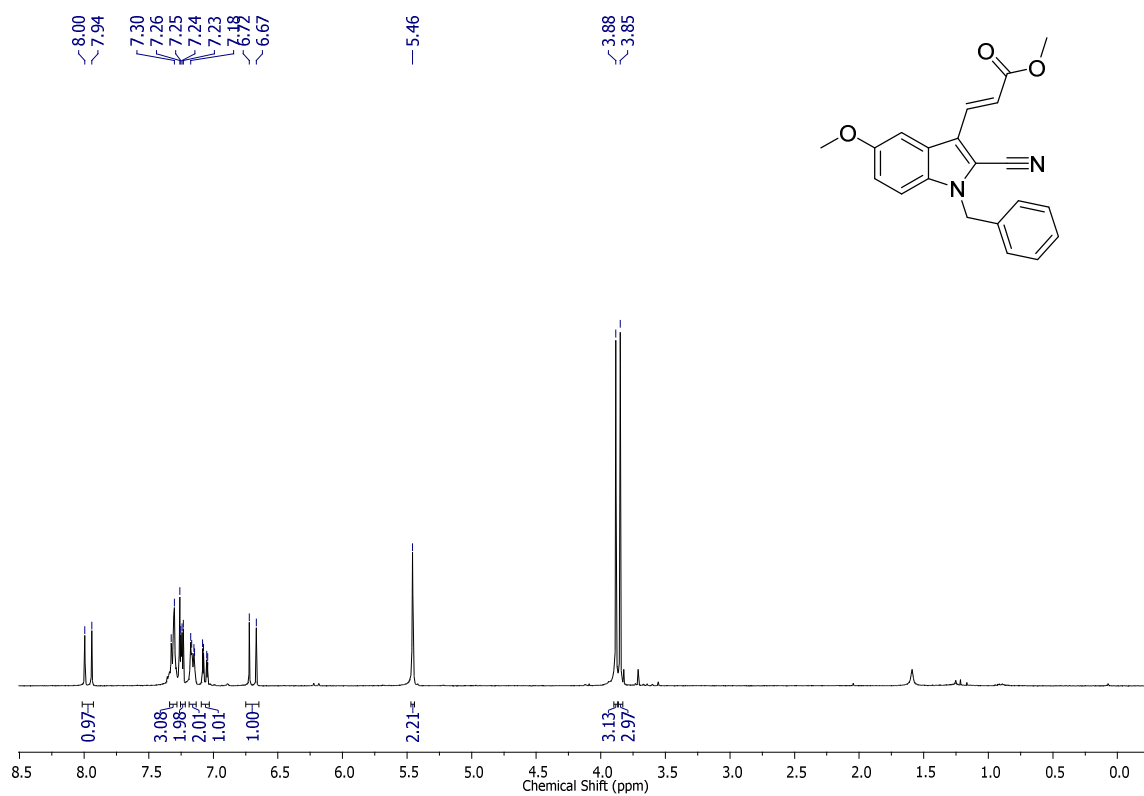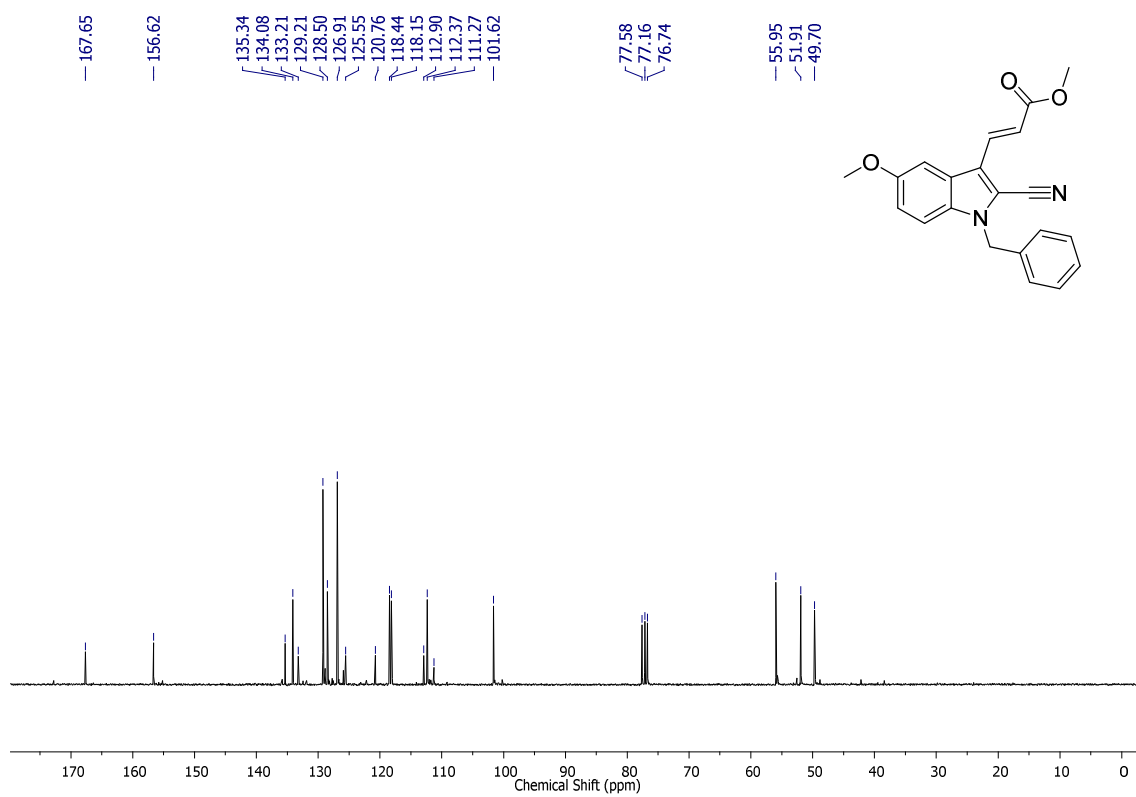

**(E)-Methyl-3-(1-benzyl-2-cyano-6-methoxy-1H-indol-3-yl)acrylate (10e)**

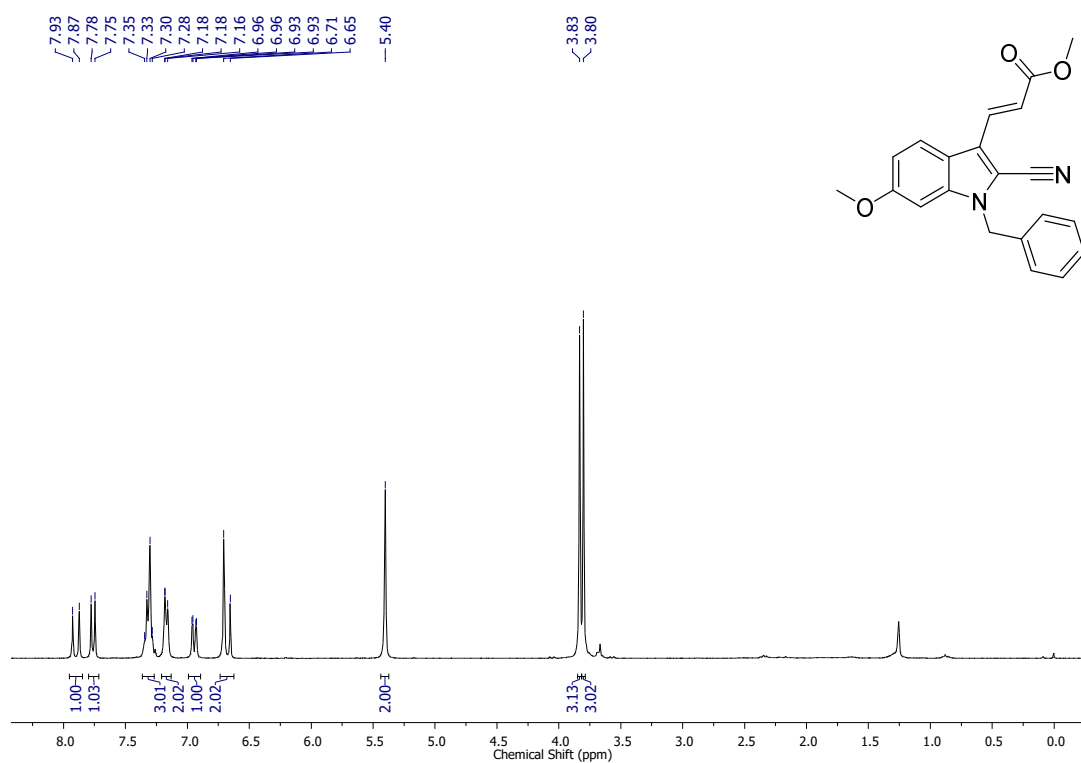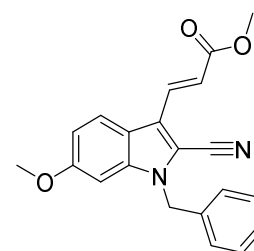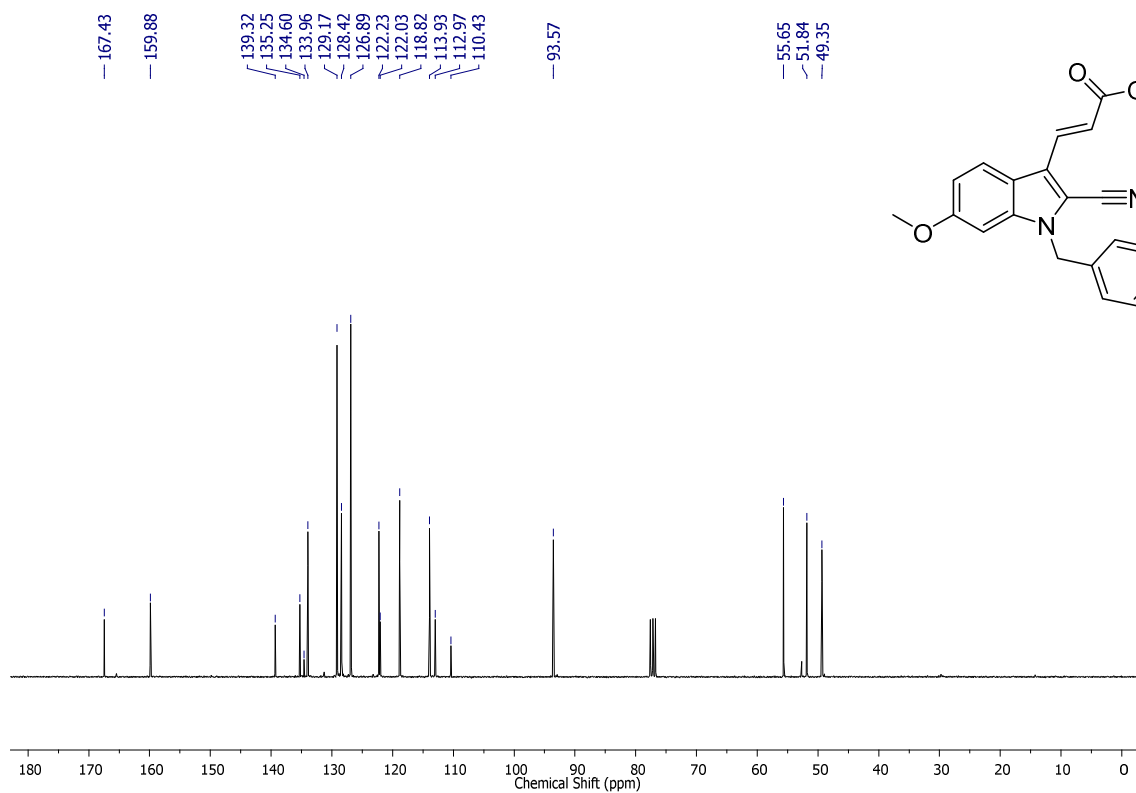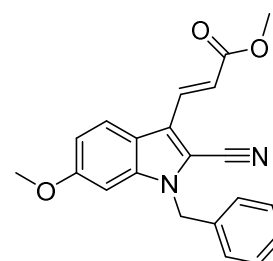

**(E)-Methyl 3-(1-benzyl-2-cyano-5-fluoro-1*H*-indol-3-yl)acrylate (10f)**

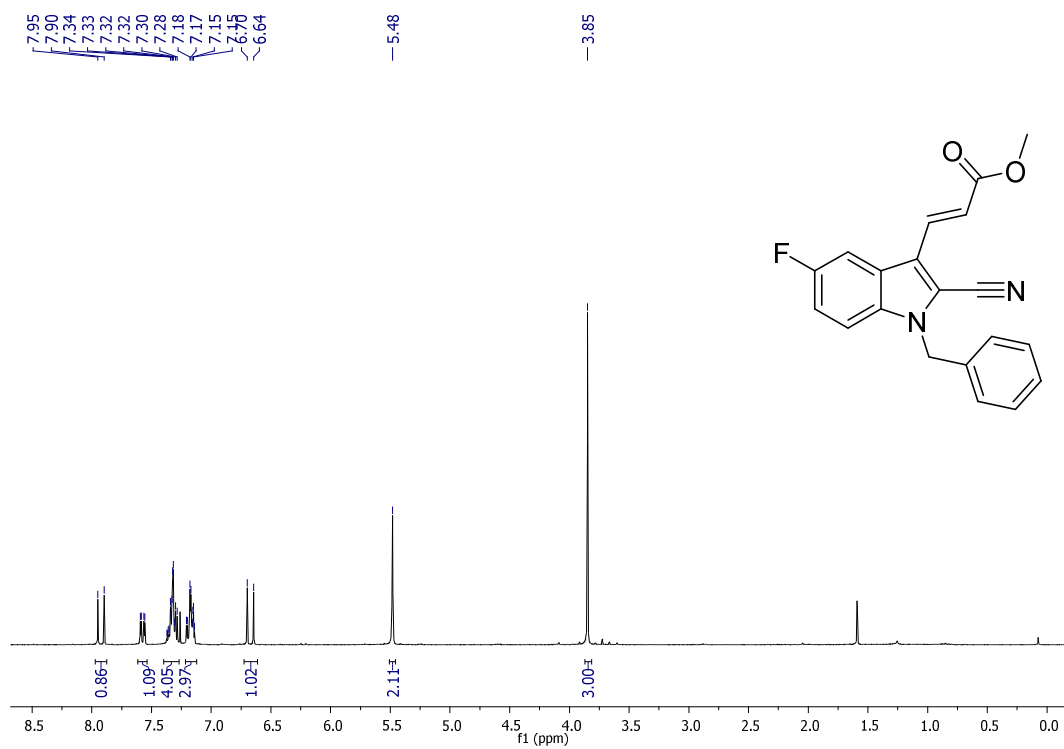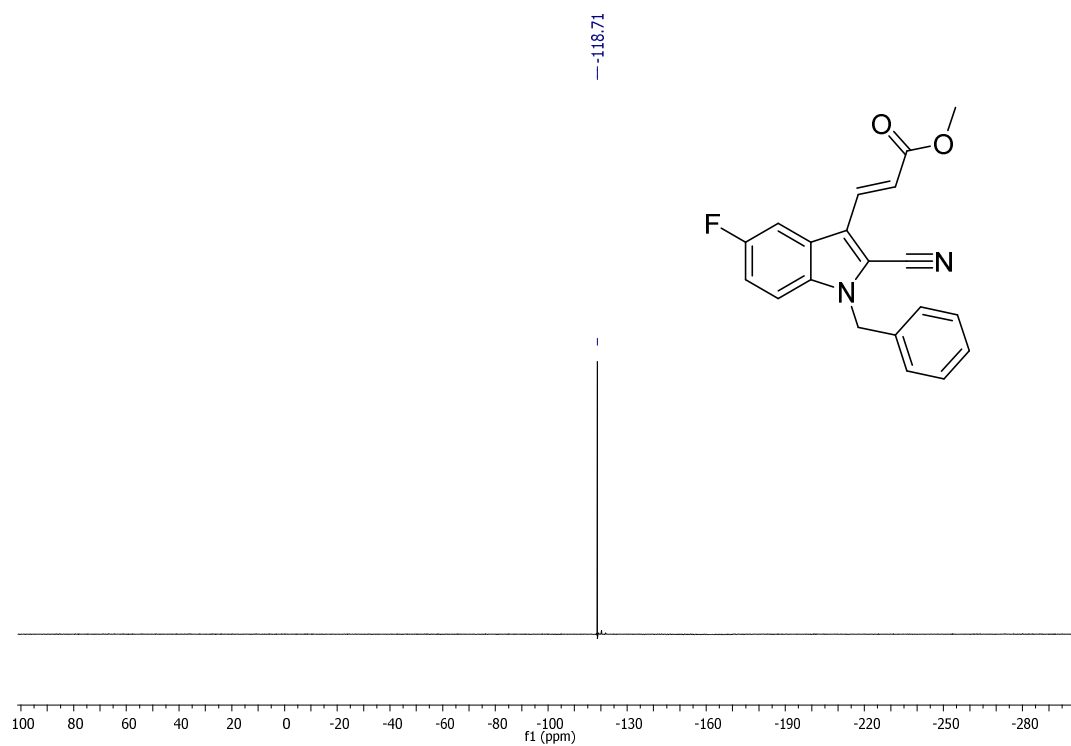

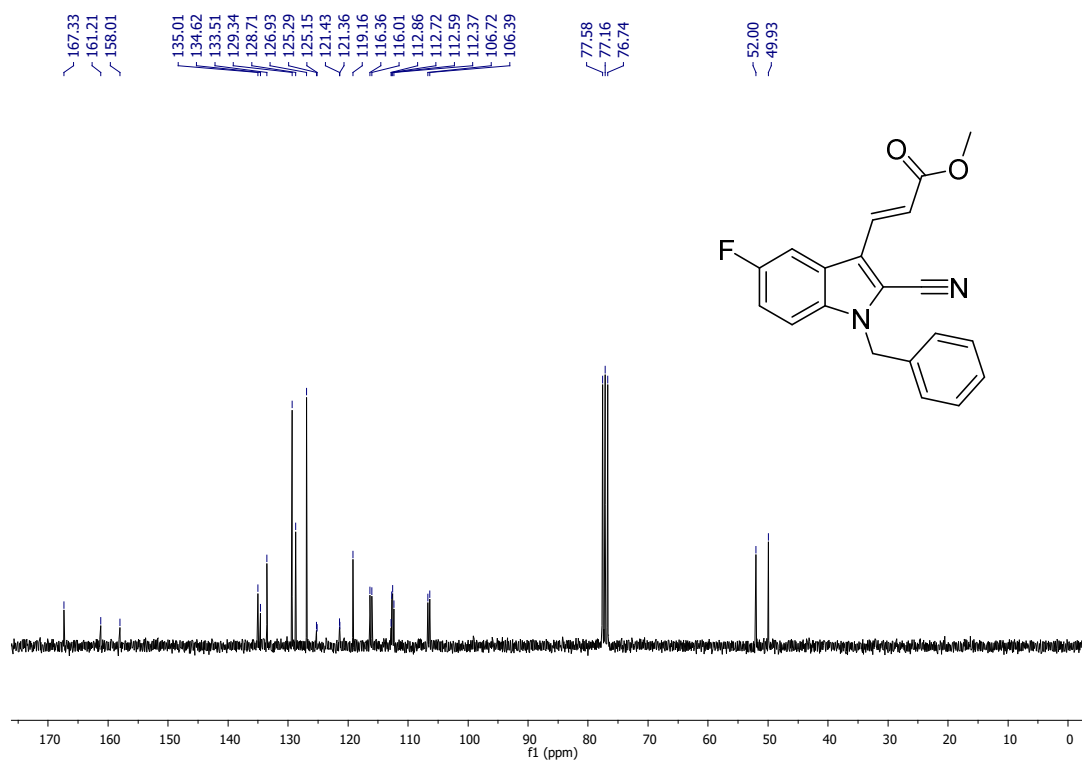

**(E)-1-Benzyl-3-(3-methylbut-1-en-1-yl)-1H-indole-2-carbonitrile (11b)**

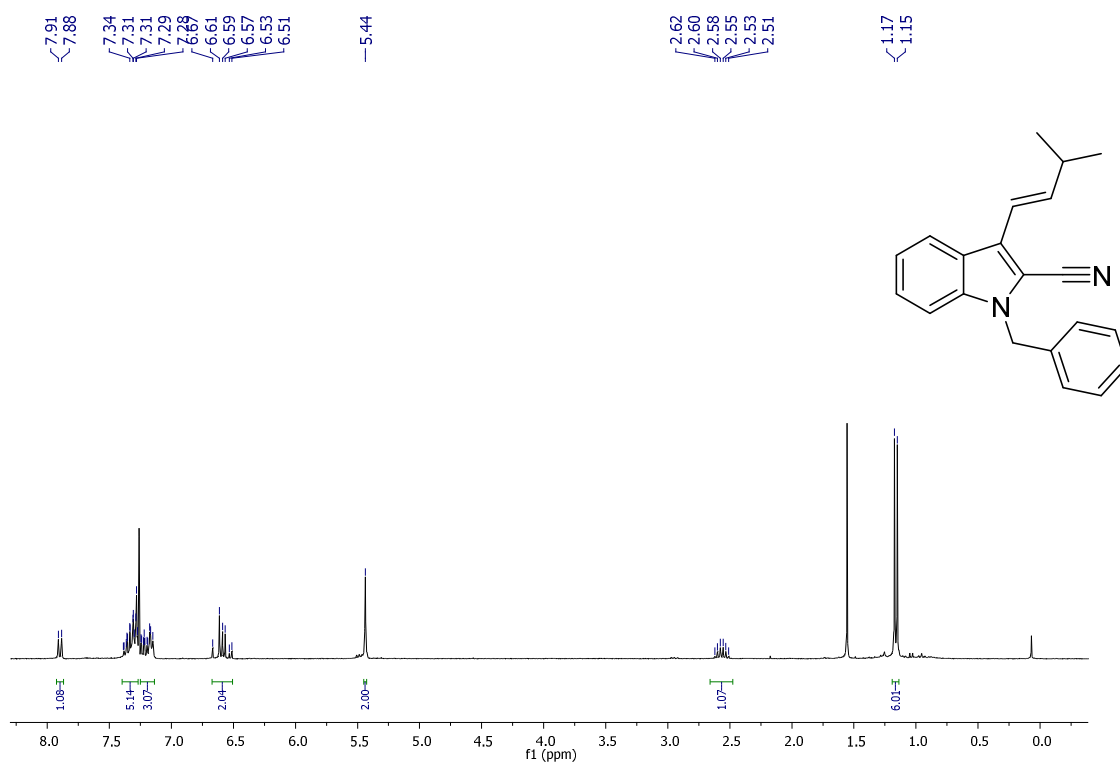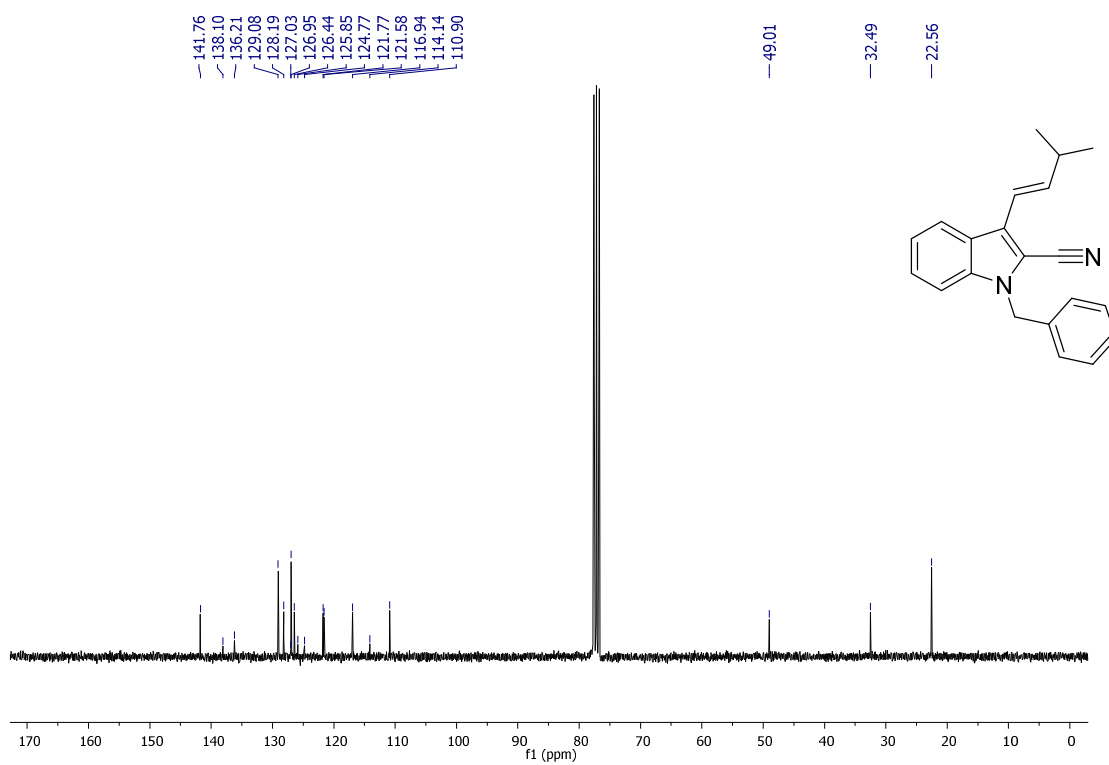



**(*E*)-1-Benzyl-3-(2-(trimethylsilyl)vinyl)-1*H*-indole-2-carbonitrile (11c)**

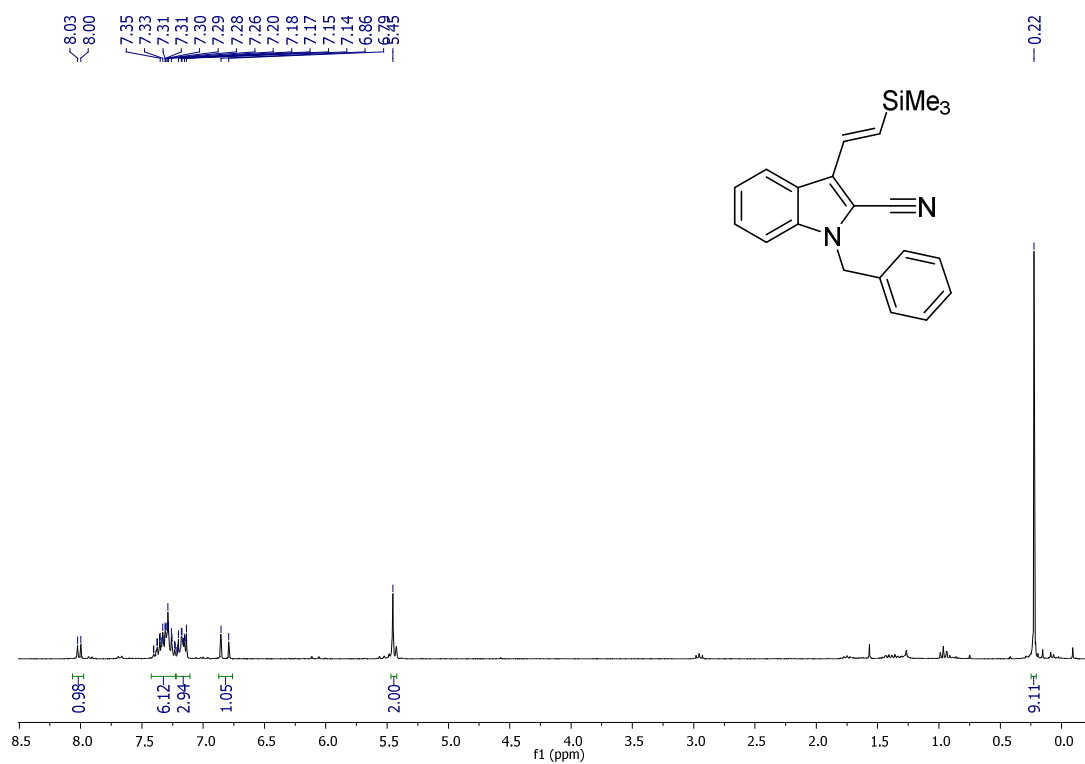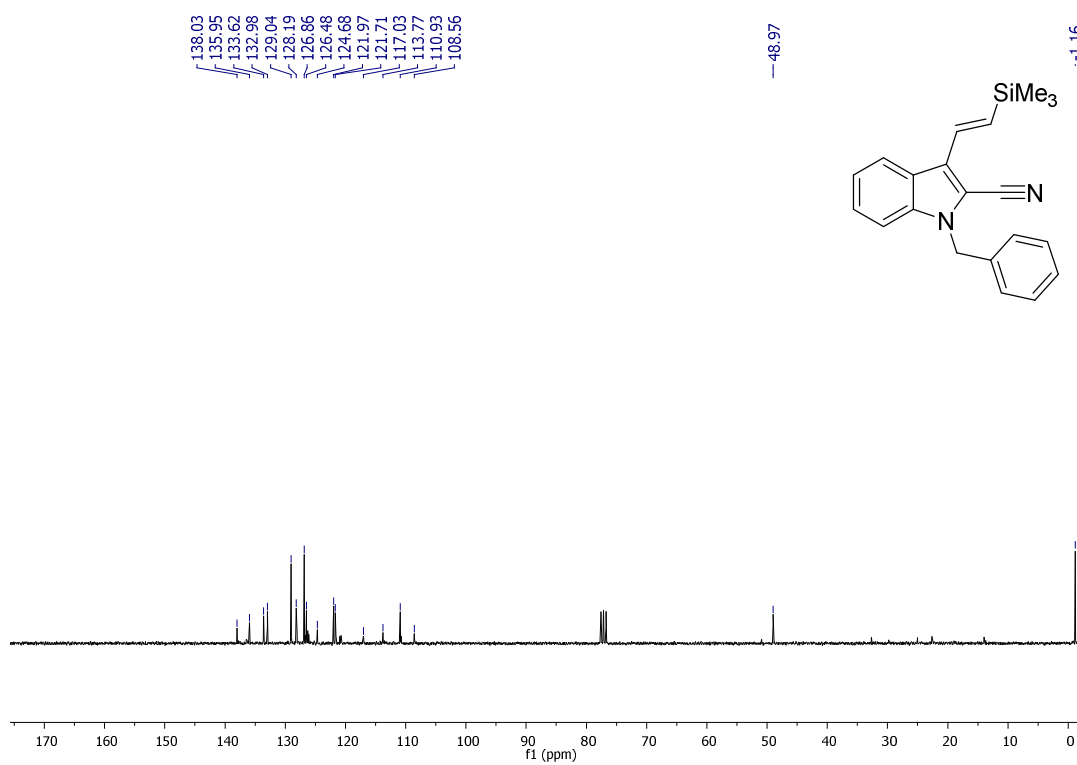

**1-(1-Benzyl-3-(*p*-tolylethynyl)-1*H*-indol-2-yl)pentan-1-one (8b')**

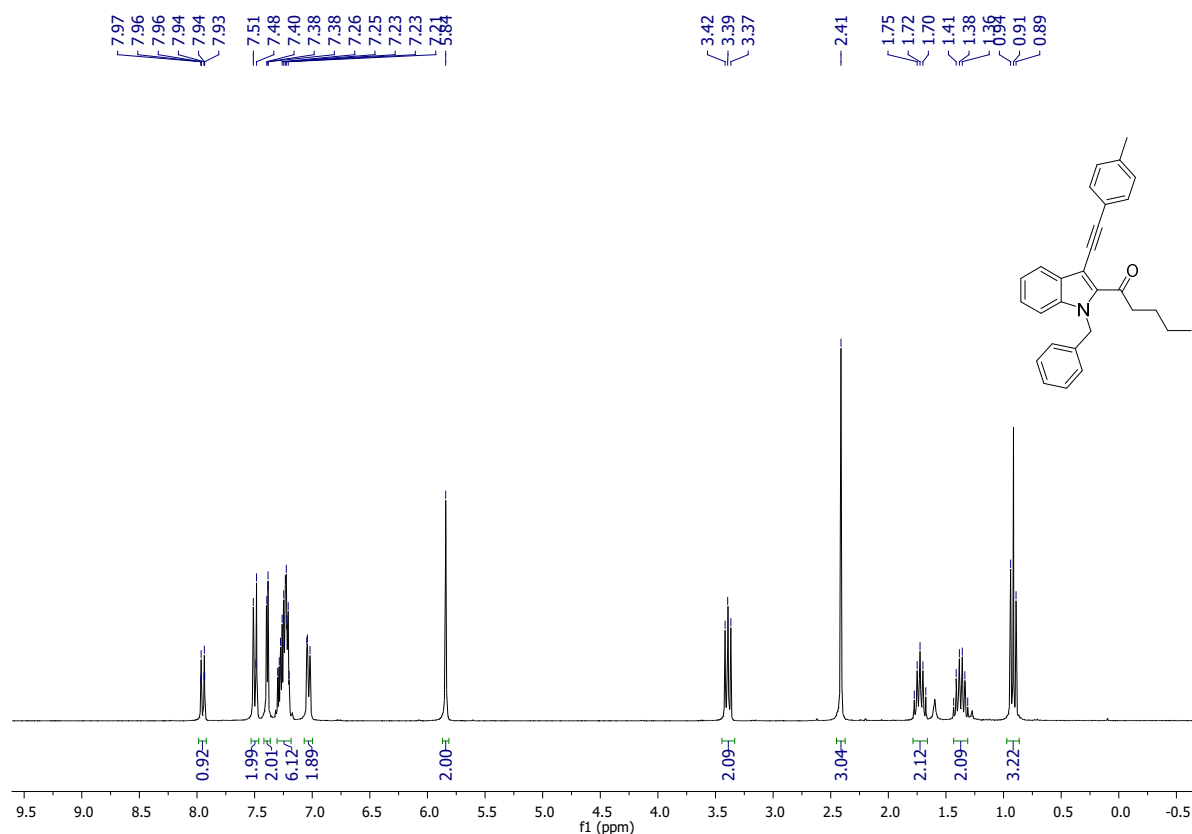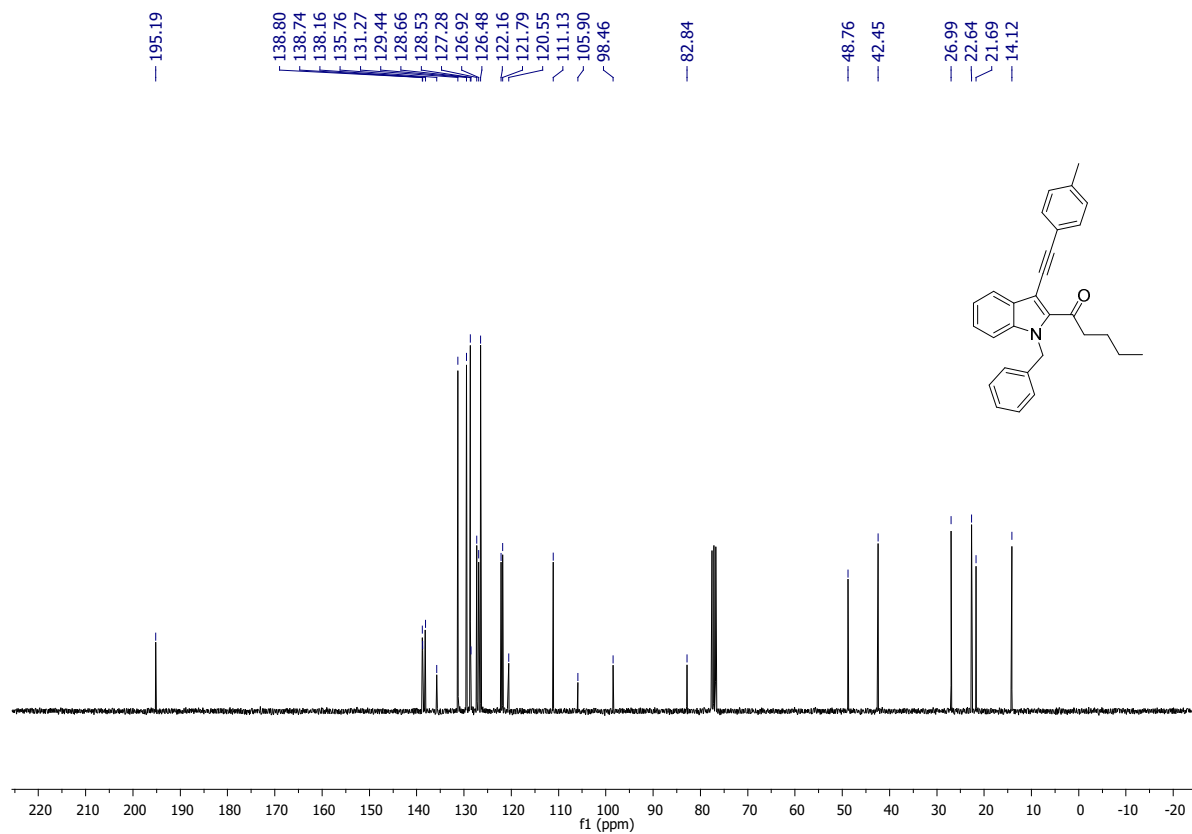

Supplement: s1 [file s1]
